# Supplementary material for: Engineering POLYTAC Nanoparticles for Bioorthogonal Click Reaction-Enforced Protein Degradation and Breast Cancer Therapy
Source: Research Square preprint supplement (doi:10.21203/rs.3.rs-1197718/v1), 2022-02-10
Supplement: Supplementary file 1 [file 166b2539f78c72e8a14c32fb.docx]

**Supporting Information**

**for**

**Engineering POLYTAC Nanoparticles for Bioorthogonal Reaction-Enforced Precise Protein Degradation and Breast Cancer Therapy**

Jing Gao1,2,3, Qiwen Zhu2, Bo Hou2,4, Lei Yang5,2, Xingyu Jiang5,2, Zhifeng Zou2,4, Xutong Li2, Zhiai Xu4, Tianfeng Xu2, Mingyue Zheng2, Huixiong Xu1,3,*, Haijun Yu2,*

1. Center of Minimally Invasive Treatment for Tumor, Department of Medical Ultrasound, Shanghai Tenth People’s Hospital; Ultrasound Research and Education Institute, Clinical Research Center for Interventional Medicine, School of Medicine, Tongji University, Shanghai 200072, China;

2. State Key Laboratory of Drug Research & Center of Pharmaceutics, Shanghai Institute of Materia Medica, Chinese Academy of Sciences, Shanghai 201203, China;

3. Shanghai Engineering Research Center of Ultrasound Diagnosis and Treatment; National Clinical Research Center for Interventional Medicine, Shanghai 200072, China;

4. School of Chemistry and Molecular Engineering, East China Normal University, Shanghai 200241, China;

5. Nanjing University of Chinese Medicine, Nanjing, 210023, China;

[*] Corresponding authors: Prof. Huixiong Xu, xuhuixiong2022@126.com; Prof. Haijun Yu, E-mail: [hjyu@simm.ac.cn](mailto:hjyu@simm.ac.cn).

**Materials and methods**

**Materials:** 1-(3-Dimethylaminopropyl)-3-ethylcarbodiimide hydrochloride (EDCI), 1-Hydroxybenzotriazole (HOBT), 4-Dimethylaminopyridine (DMAP), Trifluoroacetic acid (TFA), N, N-Diisopropylethylamine (DIEA), N,N-Dimethylacetamide (anhydrous, DMAC), Dichloromethane (anhydrous, DCM), Dimethyl sulfoxide (anhydrous, DMSO), N,N-Dimethylformamide (anhydrous, DMF), 2,2'-Azobis (2-methylpropionitrile (AIBN), and methanol (HPLC, MeOH) were purchased from J&K Chemicals (Shanghai, China). 4-Cyano-4-(dodecylsulfanylthiocarbonyl) sulfanylpentanoic acid (CDP), 2-(diisopropylamino) ethyl methacrylate (DPA), Matrix metalloproteases-2/9 (MMP-2/9), Triethylene glycol and tert-butyl (S)-2-(4-(4-chlorophenyl)-2,3,9-trimethyl-6H-thieno[3,2-f][1,2,4]triazolo[4,3-a][1,4]diazepin-6-yl)acetate (JQ1) were obtained from Sigma-Aldrich (Shanghai, China). Bis(2-hydroxyethyl) disulfide, Triphosgene, 2-bromoethanol, 2-hydroxyethyl methacrylate, Methacryloyl chloride and methacryloyl chloride N-ethylpropan-1-amine were purchased from TCI (Shanghai, China). Tert-butyl 2-(3-(2-aminoethoxy)propoxy)acetate, tert-butyl-2-(2-(2-(2-aminoethoxy)ethoxy)ethoxy) acetate were all purchased from Shanghai Tebo Chemical Technology Co., LTD. Fmoc-protected heptapeptide Gly-Pro-Leu-Gly-Leu-Ala-Gly (Fmoc-GPLGLAG) was synthesized by GL Biochem. Co., Ltd (Shanghai, China). Methoxy poly(ethylene glycol) amine (mPEG113-NH2) and azide-poly(ethylene glycol) amine (N3-PEG113-NH2) were purchased from Seebio Biotech. Co., Ltd (Shanghai, China). Pyropheophorbide a (PPa) and Bis(4-nitrophenyl) carbonate were purchased from Dibai biotechnology CO., LTD. (Shanghai, China). Tert-butyl ((2S)-1-((4R)-4-hydroxy-2-(((S)-1-(4-(4-methylthiazol-5-yl)phenyl)ethyl)carbamoyl)pyrrolidin-1-yl)-3,3-dimethyl-1-oxobutan -2-yl) carbamate was obtained from Ruozhi Chemical Technology Co., LTD. (Shanghai, China).

Dulbecco’s modified eagle medium (DMEM), 0.25% trypsin-EDTA, penicillin/streptomycin solution, PBS buffer solution (1 ×), bovine serum albumin (BSA, fraction V), BCA protein quantification kit, protein marker (10-190 kDa), TBST buffer solution (10 ×), HEPES buffer solution (2 ×), 4’,6-Diamidino-2-phenylindole dihydrochloride (DAPI), Anti-fade solution, Lyso-green DND-189, singlet oxygen fluorescent probe SOSG, reactive oxygen species fluorescent probe DCFH-DA, cell counting kit-8 (CCK-8), MG132 proteasome inhibitor and ECL luminescence reagent were purchased from Meilun Biotech Co., Ltd (Dalian, China). Fetal bovine serum (FBS) was purchased from Gibco (Tulsa, OK). BD Matrigel, Tris-Base, glycine, SDS, Peroxidase-Conjugated Goat Anti-Rabbit IgG (H+L) and Peroxidase-Conjugated Goat Anti-Mouse IgG (H+L) were purchased from YEASEN (Shanghai, China). The antibodies against BRD4, c-Myc, caspase-3, GAPDH, β-actin, β-tubulin were all purchased from Abcam (Shanghai). All other reagents and solvents were analytical grade and obtained from SinoPharm Chemical Reagent Co., Ltd. (Shanghai, China).

**Cell lines and animals**

MDA-MB-231 human breast cancer cell line was obtained from the cell bank of Chinese Academy of Sciences (Shanghai, China). The cells were incubated in complete DMEM cell culture medium containing FBS 10% (V/V), penicillin G sodium and streptomycin sulfate (100 U/mL), and incubated at 37 ℃ under a humidified atmosphere containing 5% of CO2. All cell culture studies were performed in the logarithmic phase of cell growth *in vitro*.

Balb/c nude mice (female, 4-week-old, 18 ~ 20 g) were obtained from Shanghai Experimental Animal Center (Shanghai, China). All animal procedures were carried out under the guidelines approved by the Institutional Animal Care and Use Committee (IACUC) of Shanghai Institute of Material Medica, Chinese Academy of Sciences.

**Structure-based molecular docking**

The crystal structure of VHL obtained from the complex crystal structure that the PROTAC MZ1 in complex with the BRD4 and pVHL:ElonginC:ElonginB (PDB code 5T35) was used for docking studies implemented by Schrödinger's Maestro (2018). The crystal structure was prepared using the Protein Preparation Wizard module with default parameters. The process of protein preparation included the determination of valence bonds, the addition of hydrogen atom, removal of water molecule and heteroatom, optimization of hydrogen bond network, optimization of the orientation of Asn, Gln, and His, and restrained structural optimization. The grid box of VHL binding pocket was generated with the Receptor Grid Generation module by setting the central as VHL ligand part of the MZ1 PROTAC. Subsequently, the three-dimensional coordinates, different stereoisomers, and protonation states at pH 7.0 ± 2.0 of VHL ligand were generated with LigPred Module. Finally, molecular docking was performed with the Glide module in standard precision mode. The top pose with docking score of -8.920 was selected for further analysis.

**Supplementary Scheme 1. Synthesis of ARV-771**

**Synthesis of (2S,4R)-1-((S)-2-amino-3,3-dimethylbutanoyl)-4-hydroxy-N-((S)-1-(4-(4-methylthiazol-5-yl)phenyl)ethyl)pyrrolidine-2-carboxamide (2)**

Compound 1 (commercially available, 500.0 mg, 0.92 mmol) was dissolved in DCM solution containing 50% of TFA (v/v), and stirred at room temperature for 3 h. The reaction was monitored by thin layer chromatography (TLC). The solvent was removed under pressure 3 h post-reaction. Thereafter, the crude product was redissolved in DCM and washed with water. The organic layer was collected and dried over anhydrous Na2SO4, the raw product was purified by silica gel chromatography (DCM: MeOH = 80:1~20:1) to obtain purified compound 2 (375.6 mg, yield 90%) as white solid. 1H-NMR (CDCl3, 500 MHz) δ:1.03 (s, 9H), 1.38 (d, *J* = 7.0 Hz, 3H) 1.78 (m, 1H), 2.10 (dd, *J* = 12.95 Hz, 7.7 Hz, 1H), 2.45(s, 3H), 3.50 (dd, *J* = 10.95 Hz, 3.55 Hz, 1H), 3.67 (d, *J* = 11.05 Hz, 1H), 3.93 (s, 1H), 4.34 (s, 1H), 4.54 (m, 1H), 4.92 (m, 1H), 5.23 (d, *J* = 3.05 Hz, 1H), 7.38 (d, *J* = 8.2 Hz, 2H), 7.44 (d, *J* = 8.3 Hz, 2H), 7.99 (s, 2H), 8.56 (d, *J* = 7.8 Hz, 1H), 8.99 (s, 1H).

**Synthesis of** **(S)-2-(4-(4-chlorophenyl)-2,3,9-trimethyl-6H-thieno[3,2-f][1,2,4]triazolo[4,3-a][1,4]diazepin-6-yl)acetic acid (4)**

Compound 3 (commercially available, 500.0 mg, 1.1 mmol) was dissolved in 50% TFA (V/V)-containing DCM solution and stirred for 3 h at room temperature. After removal of the solution, the raw product was redissolved in DCM, washed with water, dried over anhydrous Na2SO4, and then purified by silica gel column chromatography (DCM: MeOH = 80:1~20:1) to obtain compound 4 as yellow solid (392.5 mg, yield 90%). 1H-NMR (CDCl3, 500 MHz) δ:1.09 (s, 3H), 2.42 (s, 3H), 2.71 (s, 3H), 3.59 (dd, *J* =12.55 Hz, 8.7 Hz, 1H), 3.71 (dd, *J* = 12.4 Hz,8.8 Hz, 1H), 4.62 (t, *J* = 8.7 Hz, 1H), 7.33 (d, *J* = 10.8 Hz, 2H), 7.43 (d, *J* = 10.55 Hz, 2H).

**Synthesis of tert-butyl (S)-2-(3-(2-(2-(4-(4-chlorophenyl)-2,3,9-trimethyl-6H-thieno[3,2-f][1,2,4]triazolo[4,3-a][1,4]diazepin-6 yl) acetamido)ethoxy)propoxy) acetate (6)**

Compound 4 (200.4 mg, 0.50 mmol, 1.0 eq), compound 5 (commercially available, 128.2 mg, 0.55 mmol, 1.1 eq), HATU (239.3 mg, 0.625 mmol, 1.25 eq) and DIEA (322.5 mg, 2.5 mmol, 5.0 eq) were dissolved in DCM, and stirred overnight at room temperature. The reactant was washed with water and saturated NH4Cl solution, and then dried with anhydrous Na2SO4. The crude production was purified via silica gel column chromatography (DCM: MeOH = 80:1~20:1) to obtain compound 6 as light-yellow oily liquid (180.5 mg, 59% yield). 1H-NMR (CDCl3, 500 MHz) δ:1.50 (s, 9H), 1.69 (s, 3H), 1.92 (m, 2H), 2.42 (m, 3H), 2.68 (s, 3H), 3.41 (dd, *J* = 14.5 Hz, 7.25 Hz, 1H), 3.49 (m, 1H), 3.56 (m, 4H), 3.61 (t, *J* = 6.3 Hz, 2H), 3.64 (t, *J* = 6.15 Hz, 2H), 3.99 (s, 2H), 4.66 (t, *J* = 7.0 Hz, 1H), 6.84 (s, 1H), 7.34 (d, *J* = 8.8 Hz, 2H), 7.43 (d, *J* = 8.55 Hz, 2H).

**Synthesis of (S)-2-(3-(2-(2-(4-(4-chlorophenyl)-2,3,9-trimethyl-6H-thieno[3,2-f][1,2,4]triazolo[4,3-a][1,4]diazepin-6-yl)acetamido)ethoxy)propoxy)acetic acid (7)**

Compound 7 (180.5 mg, 0.29 mmol, 1.0 eq) was dissolved in DCM solution containing 50% TFA (V/V), and stirred at room temperature for 3 h. After removal of solution by vacuum evaporation, the crude product was diluted by DCM, washed with water, dried over anhydrous Na2SO4, and then purified by silica gel column chromatography (DCM: MeOH = 80:1~20:1) to obtain compound 7 as yellow solid (140.3 mg, 86% yield). 1H-NMR (CDCl3, 500 MHz) δ: 1.71 (s, 3H), 1.89 (s, 2H), 2.44 (s, 3H), 2.72 (s, 3H), 3.52 (m, 3H), 3.64 (t, *J* = 4.95 Hz, 2H), 3.70 (m, 4H), 3.77 (m, 1H), 4.13 (q, *J* =16.7 Hz, 2H), 4.75 (dd, *J* = 16.85 Hz, 6.2 Hz, 2H), 7.36 (d, *J* = 8.75 Hz, 2H), 7.43 (d, *J* = 8.45 Hz, 2H).

**Synthesis of (2S,4R)-1-((S)-2-(tert-butyl)-15-((S)-4-(4-chlorophenyl)-2,3,9-trimethyl-6H-thieno[3,2-f][1,2,4]triazolo[4,3-a][1,4]diazepin-6-yl)-4,14-dioxo-6,10-dioxa-3, 13-diazapentadecanoyl)-4-hydroxy-N-((S)-1-(4-(4-methylthiazol-5-yl)phenyl) ethyl) pyrrolidine-2-carboxamide (8, ARV771)**

Compound 7 (140.3 mg, 0.25 mmol, 1.0 eq), compound 2 (133.2 mg, 0.30 mmol, 1.2 eq), HATU (142.5 mg, 0.38 mmol, 1.5 eq) and DIEA (161.3 mg, 1.25 mmol, 5.0 eq) were dissolved in DCM and stirred overnight. The crude product was washed with water and saturated NH4Cl solution, dried over anhydrous Na2SO4 solution. After removal of solution, the raw product was then purified by silica gel column chromatography (DCM: MeOH = 80:1~15:1) to obtain compound 8 as white solid (172.5 mg, 70% yield). 1H-NMR (CDCl3, 500 MHz) δ: 1.08 (s, 9H), 1.42 (d, *J* = 7.0 Hz, 3H), 1.67 (s, 3H), 1.83-1.92 (m, 2H), 2.16-2.23 (m, 5H), 2.40 (s, 3H), 2.50 (s, 3H), 2.63 (d, *J* = 7.4 Hz, 2H), 3.38-3.67 (m, 12H), 3.93 (d, *J* = 15.5 Hz, 1H), 4.03 (d, *J* = 15.5 Hz, 1H), 4.63-4.67 (m, 2H), 4.82-4.85 (m, 1H), 5.04-5.07 (m, 1H), 7.28-7.41 (m, 8H), 7.67 (d, *J* = 7.75 Hz, 2H), 8.88 (s, 1H). 13C-NMR (CDCl3, 125 MHz) δ: 11.8, 13.1, 14.4, 16.1, 22.1, 26.5, 29.5, 35.6, 36.5, 38.4, 39.5, 48.8, 54.2, 56.9, 57.1, 58.7, 67.6, 69.0, 69.4, 70.0, 70.2, 76.8, 77.0, 77.3, 126.5, 128.7, 129.4, 129.9 130.6, 130.8, 131.0, 131.7, 131.8, 136.5, 136.8, 143.4, 148.4, 150.0, 150.2, 155.7, 163.8, 170.3, 170.5, 170.6, 171.2. LC-MS m/z Calcd. for C49H60ClN9O7S2 [M+H]+ 986.4, Found 986.0.

**Supplementary Scheme 2. Synthesis of ARV-771 mimic (mARV771)**

**Synthesis of (2S,4R)-1-((S)-2-amino-3,3-dimethylbutanoyl)-4-hydroxy-N-(4-(4-methylthiazol-5-yl)benzyl)pyrrolidine-2-carboxamide (10)**

Compound 9 (commercially available, 500.0 mg, 0.94 mmol, 1.0 eq) was dissolved in DCM solution containing 50% of TFA (v/v), and stirred at room temperature for 3 h and then removed the solution by vacuum evaporation. The raw product was redissolved in DCM, washed with water, dried over anhydrous Na2SO4, and then purified by silica gel column chromatography (DCM: MeOH = 80:1~20:1) to obtain compound 10 as white solid (363.8 mg, 90% yield). 1H-NMR (CDCl3, 500 MHz) δ: 1.47 (s, 9H), 2.41 (s, 3H), 2.67 (s, 2H), 3.39 (m, 1H), 3.68 (d, *J* = 5.4 Hz, 2H), 3.74 (m, 2H), 4.04 (s, 2H), 4.66 (d, *J* = 7.0 Hz, 1H), 7.33 (d, *J* = 8.8 Hz, 2H), 7.42 (d, *J* = 8.5 Hz, 2H).

**Synthesis of (2S,4R)-1-((S)-2-(tert-butyl)-15-((S)-4-(4-chlorophenyl)-2,3,9-trimethyl-6H-thieno[3,2-f][1,2,4]triazolo[4,3-a][1,4]diazepin-6-yl)-4,14-dioxo-6,10-dioxa-3,13-diazapentadecanoyl)-4-hydroxy-N-(4-(4-methylthiazol-5-yl)benzyl) pyrrolidine-2-carboxamide (11, mARV771)**

Compound 7 (140.3 mg, 0.25 mmol, 1.0 eq), compound 10 (120.5 mg, 0.30 mmol, 1.2 eq), HATU (142.5 mg, 0.38 mmol, 1.5 eq) and DIEA (161.3 mg, 1.25 mmol, 5.0 eq) were dissolved in DCM, stirred overnight at room temperature. The mixture was then washed with water and saturated NH4Cl solution, and dried over anhydrous Na2SO4 solution. The crude production was further purified by silica gel column chromatography (DCM: MeOH = 80:1~15:1) to obtain compound 11 as white solid (177.2 mg, 73% yield). 1H-NMR (CDCl3, 500 MHz) δ: 1.02 (s, 9H), 1.65 (s, 3H), 1.78 (s, 2H), 1.96 (d, *J* = 9.8 Hz, 2H), 2.21 (m, 2H), 2.40 (s, 3H), 2.50 (s, 3H), 2.62 (s, 3H), 3.32-3.71 (m, 10H), 3.92-4.04 (m, 2H), 4.44 (dd, *J* = 15.3 Hz, 6.4 Hz, 1H), 4.54 (s, 1H), 4.64 (dd, *J* = 8.05 Hz, 6.0 Hz, 1H), 4.68 (d, *J* =9.35 Hz, 1H), 4.83 (t, *J* = 8.1 Hz, 1H), 7.23-7.36 (m, 8H), 7.60-7.66 (m, 2H), 8.67 (s, 1H). 13C-NMR (CDCl3, 125 MHz) δ: 11.8, 12.0, 13.1, 14.4, 16.1, 17.4, 18.6, 26.5, 29.3, 29.7, 30.3, 35.6, 37.1, 38.1, 39.6, 41.9, 42.9, 53.7, 54.2, 56.9, 57.2, 59.0, 67.8, 68.2, 69.3, 70.2, 70.3, 76.8, 77.1, 77.3, 127.8, 128.7, 129.2, 130.0, 130.8, 131.1, 131.7, 131.9, 136.5, 136.9, 138.4, 148.3, 150.0, 150.2, 155.7, 164.0, 170.4, 170.6, 171.1, 171.6. LC-MS m/z Calcd. for C48H58ClN9O7S2 [M+H]*+* 972.4, Found 972.1.

**Supplementary Scheme 3. Synthesis of MZ1**

**Synthesis of** **tert-butyl (S)-1-(4-(4-chlorophenyl)-2,3,9-trimethyl-6H-thieno[3,2-f][1,2,4]triazolo[4,3-a][1,4]diazepin-6-yl)-2-oxo-6,9,12-trioxa-3-azatetradecan-14-oate (13)**

Compound 4 (200.4 mg, 0.50 mmol, 1 eq), compound 12 (commercially available, 154.5 mg, 0.55 mmol, 1.1 eq), HATU (239.3 mg, 0.625 mmol, 1.25 eq) and DIEA (322.5 mg, 2.5 mmol, 5.0 eq) were dissolved in DCM, and stirred overnight at room temperature. The reactive solution was then diluted with DCM, washed with water and saturated NH4Cl solution, and then dried over anhydrous Na2SO4. After removal of solution, the crude product was purified via silica gel column chromatography (DCM: MeOH = 80:1~20:1) to obtain compound 6 as light-yellow oily liquid (177.5 mg, 55% yield). 1H-NMR (CDCl3, 500 MHz) δ: 1.04 (s, 9H), 1.25 (s, 3H), 2.27 (s, 3H), 2.51 (s, 3H), 3.58-3.60 (m, 2H), 3.82-4.21 (m, 10H), 4.32 (dd, *J* = 15.05 Hz, 5.6 Hz, 2H), 4.50 (s, 2H), 4.58 (m, 2H), 7.32 (d, *J* = 8.35 Hz, 2H), 7.35 (d, *J* = 8.35 Hz, 2H), 8.87 (s, 1H).

**Synthesis of (S)-1-(4-(4-chlorophenyl)-2,3,9-trimethyl-6H-thieno[3,2-f][1,2,4]triazolo[4,3-a][1,4]diazepin-6-yl)-2-oxo-6,9,12-trioxa-3-azatetradecan-14-oic acid (14)**

Compound 13 (177.5 mg, 0.275 mmol) was dissolved in DCM containing 50% of TFA (v/v), and stirred at room temperature for 3 h and then removed the solvent and TFA by vacuum evaporation. Then, the crude production was diluted with DCM, washed with water, dried over anhydrous Na2SO4, and then purified by silica gel column chromatography (DCM: MeOH = 80:1~20:1) to give compound 14 as light-yellow solid (132.7 mg, 82% yield). 1H-NMR (CDCl3, 500 MHz) δ: 1.69 (s, 3H), 2.41 (s, 3H), 2.68 (s, 3H), 3.47 (m, 2H), 3.57-3.77 (m, 12H), 4.18 (m, 2H), 4.73 (t, *J* = 7.05 Hz, 1H), 7.33 (d, *J* = 8.8 Hz, 2H), 7.41 (d, *J* = 8.5 Hz, 2H), 7.74 (t, *J* = 5.1 Hz, 1H).

**Synthesis of (2S,4R)-1-((S)-2-(tert-butyl)-17-((S)-4-(4-chlorophenyl)-2,3,9-trimethyl-6H-thieno[3,2-f][1,2,4]triazolo[4,3-a][1,4]diazepin-6-yl)-4,16-dioxo-6,9,12-trioxa-3,15-diazaheptadecanoyl)-4-hydroxy-N-(4-(4-methylthiazol-5-yl)benzyl) pyrrolidine-2-carboxamide (15, MZ1)**

Compound 14 (132.7 mg, 0.23 mmol, 1.0 eq), compound 10 (108.5 mg, 0.27 mmol, 1.2 eq), HATU (127.5 mg, 0.34 mmol, 1.5 eq) and DIEA (145.8 mg, 1.13 mmol, 5.0 eq) were dissolved in DCM, and then stirred overnight. The mixture was washed through water and saturated NH4Cl solution, dried over anhydrous Na2SO4 solution, filtered. And then the raw product was purified by silica gel column chromatography (DCM: MeOH = 80:1~15:1) to obtained compound 15 as white solid (168.8 mg, 75% yield). 1H-NMR (CDCl3, 500 MHz) δ: 1.07 (s, 9H), 1.47 (s, 3H), 1.67 (s, 3H), 2.42 (m, 2H), 2.40-2.45 (m, 4H), 2.52 (s, 3H), 2.63 (s, 3H), 3.36-3.40 (m, 2H), 3.48-3.58 (m, 2H), 3.61-3.74 (m, 12H), 4.07-4.11 (m, 1H), 4.30 (m, 1H), 4.46 (m, 1H), 4.67 (m, 1H), 4.73 (d, *J* = 9.3 Hz, 1H), 4.81 (t, *J* = 7.7 Hz, 1H), 5.08 (t, *J* = 7.2 Hz, 1H), 7.30-7.39 (m, 8H), 7.41 (m, 1H), 7.54 (s, 1H), 7.86 (s, 1H), 8.67 (s, 1H). 13C-NMR (CDCl3, 125 MHz) δ: 11.8, 13.1, 14.4, 16.1, 22.2, 26.5, 35.6, 35.8, 38.1, 39.8, 48.8, 54.2, 56.8, 57.1, 58.7, 69.9, 70.2, 70.3, 70.4, 70.8, 71.6, 76.8, 77.0, 77.3, 126.5, 128.7, 129.5, 130.0, 130.7, 130.8,130.9, 131.1, 131.9, 136.5, 136.8, 143.4, 148.5, 149.8, 150.2, 155.9, 163.9, 170.0, 170.8, 170.9, 171.4. LC-MS m/z Calcd. for C49H60ClN9O8S2 [M+H]+ 1002.4, Found 1002.1.

**Supplementary Scheme 4. Synthesis of MZ1 mimic (16, mMZ1)**

**Synthesis of (2S,4R)-1-((S)-2-(tert-butyl)-17-((S)-4-(4-chlorophenyl)-2,3,9-trimethyl-6H-thieno[3,2-f][1,2,4]triazolo[4,3-a][1,4]diazepin-6-yl)-4,16-dioxo-6,9,12-trioxa-3,15-diazaheptadecanoyl)-4-hydroxy-N-((S)-1-(4-(4-methylthiazol-5-yl) phenyl)ethyl)pyrrolidine-2-carboxamide (16, mimic MZ1)**

Compound 14 (132.7 mg, 0.23 mmol, 1.0 eq), compound 2 (120.4 mg, 0.27 mmol, 1.2 eq), HATU (127.5 mg, 0.34 mmol, 1.5 eq) and DIEA (145.8 mg, 1.13 mmol, 5.0 eq) were dissolved in DCM and stirred overnight. The reaction solution was washed with water and saturated NH4Cl solution, then dried over anhydrous Na2SO4 solution. The crude product was purified by silica gel column chromatography (DCM: MeOH = 80:1~15:1) to obtain compound 16 as white solid (166.4 mg, 72% yield). 1H-NMR (CDCl3, 500 MHz) δ: 1.03 (s, 9H), 1.43 (d, *J* = 6.95 Hz, 1H), 1.66 (s, 3H), 2.22 (m, 1H), 2.39 (s, 3H), 2.44 (m, 1H), 2.49 (m, 1H), 2.52 (s, 3H), 2.59 (m, 1H), 2.65 (s, 3H), 3.46-3.48 (m, 2H), 3.53-3.58 (m, 14H), 4.12-4.16 (m, 1H), 4.45 (s, 1H), 4.66 (m, 1H), 4.69-4.76 (m, 2H), 5.07 (m, 1H), 7.23-7.39 (m, 8H), 7.41 (m, 1H), 7.58 (d, *J* = 7.8 Hz, 1H), 7.63 (s, 1H), 8.67 (s, 1H). 13C-NMR (CDCl3, 125 MHz) δ: 8.68, 11.3, 12.7, 13.2, 13.7, 14.0, 15.6, 18.6, 22.2, 26.0, 28.9, 29.0, 29.3, 29.9, 30.0, 31.5, 35.1, 35.5, 36.1, 37.6, 39.2, 42.6, 42.9, 45.0, 53.0, 53.7, 56.3, 56.7, 58.5, 64.4, 65.7, 69.5, 69.8, 69.9, 70.0, 76.4, 76.6, 76.8, 127.5, 128.3, 128.9, 130.0, 130.2, 130.5, 130.6, 131.3, 131.4, 136.1, 136.3, 137.9, 147.9, 149.4, 149.9, 155.3, 163.5, 169.4, 170.3, 170.6, 171.0. LC-MS m/z Calcd. for C50H62ClN9O8S2 [M+H]+ 1016.4, Found 1016.1.

**Supplementary Scheme 5. Synthesis of ARV771 and MZ1 methacrylate (Me-ARV771 and Me-MZ1)**

**Synthesis of 2-((2-hydroxyethyl) disulfaneyl)ethyl methacrylate (17) and 2-((2-(((4-nitrophenoxy)carbonyl)oxy)ethyl)disulfaneyl)ethyl methacrylate (18)**

2,2'-disulfanediylbis(ethan-1-ol) (commercially available, 308.0 mg, 2.0 mmol, 1.0 eq) and DIEA (775.4 mg, 6.0 mmol, 3.0 eq) were dissolved in DCM. Then, the solution of methacryloyl chloride (commercially available, 208.0 mg, 2.0 mmol, 1.0 eq) in DCM was added dropwise into the mixture, and stirred for 24 h. Then, the mixture solution was washed with water and saturated NH4Cl solution and the organic solvent was collected and dried by anhydrous Na2SO4. The crude product was further depurated by silica gel column chromatography (n-hexane: ethyl acetate = 4:1) to give compound 17 as light-yellow oily liquid (310.8 mg, 70% yield). 1H-NMR (CDCl3, 500 MHz) δ: 1.95 (s, 3H), 2.89 (t, *J* = 5.8 Hz, 2H), 2.98 (t, *J* = 6.7 Hz, 2H), 3.98 (m, 2H), 4.43 (m, 3H), 5.60 (s, 1H), 6.14 (s, 1H).

**Synthesis of 2-((2-(((((3R,5S)-1-((S)-2-(tert-butyl)-15-((S)-4-(4-chlorophenyl)-2,3,9-trimethyl-6H-thieno[3,2-f][1,2,4]triazolo[4,3-a][1,4]diazepin-6-yl)-4,14-dioxo-6,10-dioxa-3,13-diazapentadecanoyl)-5-(((S)-1-(4-(4-methylthiazol-5-yl)phenyl) ethyl)carbamoyl)pyrrolidin-3-yl)oxy)carbonyl)oxy)ethyl) disulfaneyl) ethyl methacrylate (19, Me-ARV771)**

First, to synthesize 2-((2-(((4-nitrophenoxy)carbonyl)oxy)ethyl)disulfaneyl)ethyl methacrylate (18), the bis(4-nitrophenyl) carbonate (commercially available, 851.3 mg, 2.8 mmol, 1.2 eq) and DIEA (1085.6 mg, 8.4 mmol, 3 eq) were dissolved in DCM, and then the DCM solution of compound 17 (310.8 mg, 1.4 mmol, 1 eq) was added dropwise into above solution, stirred under argon protection at room temperature for 6 h. The reaction was monitored by TLC analysis and stopped continued for 6 h. The solution was diluted by DCM, and then washed by water and NH4Cl saturated solution, dried over anhydrous Na2SO4 to obtain raw production by filtration.

compound 8 (453.6 mg, 0.46 mmol, 1.0 eq), compound 18 (267.1 mg, 0.69 mmol, 1.5 eq), DMAP (84.18 mg, 0.69 mmol, 1.5 eq) and DIEA (118.7 mg, 0.92 mmol, 2.0 eq) were dissolved in DCM, and stirred overnight at room temperature. The mixture was washed with water and saturated NH4Cl solution, dried over anhydrous Na2SO4, and purified by silica gel column chromatography (DCM: MeOH = 80:1~15:1) to give compound 19 as white solid (380.1 mg, 67% yield). 1H-NMR (CDCl3, 500 MHz) δ: 1.08 (s, 9H), 1.37 (d, *J* = 6.95 Hz, 1H), 1.69 (s, 3H), 1.82 (s, 3H), 1.84-1.94 (m, 5H), 2.40 (s, 3H), 2.49 (s, 3H), 2.58 (m, 4H), 2.96 (m, 4H), 3.86-4.01 (m, 11H), 4.30 (m, 1H), 4.39-4.42 (m, 4H), 4.63-4.67 (m, 2H), 4.86 (t, *J* = 7.7 Hz, 1H), 5.04(m, 1H), 5.26 (m, 1H), 5.58 (s, 1H), 6.13 (s, 1H), 7.23-7.32 (m, 8H), 7.41 (m, 2H), 7.89 (d, *J* = 7.75 Hz, 1H), 8.65 (s, 1H). 13C-NMR (CDCl3, 125 MHz) δ: 11.7, 13.1, 14.4, 16.1, 18.3, 21.9, 26.5, 29.4, 30.7, 33.4, 35.6, 36.9, 37.3, 38.7, 39.7, 48.9, 53.8, 54.3, 56.5, 58.4, 62.5, 62.9, 65.9, 68.0, 69.1, 69.5, 70.2, 76.7, 77.1, 77.3, 126.1, 126.5, 128.7, 129.4, 129.9, 130.6, 130.8, 131.0, 131.6, 131.9, 136.0, 136.6, 136.8, 143.2, 148.4, 149.8, 150.2, 154.2, 155.8, 163.5, 167.2, 169.6, 169.8, 170.7, 171.0. LC-MS m/z Calcd. for C58H72ClN9O11S4 [1/2M+H]+ 617.7, Found 617.4.

**Synthesis of 2-((2-(((((3R,5S)-1-((S)-2-(tert-butyl)-17-((S)-4-(4-chlorophenyl)-2,3,9-trimethyl-6H-thieno[3,2-f][1,2,4]triazolo[4,3-a][1,4]diazepin-6-yl)-4,16-dioxo-6,9,12-trioxa-3,15-diazaheptadecanoyl)-5-((4-(4-methylthiazol-5-yl)benzyl) carbamoyl)pyrrolidin-3-yl)oxy)carbonyl)oxy)ethyl)disulfaneyl)ethyl methacrylate (20, Me-MZ1)**

Compound 15 (450.5 mg, 0.45 mmol, 1.0 eq), compound 18 (263.2 mg, 0.68 mmol, 1.5 eq), DMAP (83.0 mg, 0.68 mmol, 1.5 eq) and DIEA (116.1 mg, 0.90 mmol, 2.0 eq) were dissolved in DCM, stirred overnight at room temperature. After the reaction finished, the mixture solution was washed by water and saturated NH4Cl solution, dried over anhydrous Na2SO4, filtered and purified by silica gel column chromatography (DCM: MeOH = 80:1~15:1) to give compound 20 as white solid (365.4 mg, 65% yield). 1H-NMR (CDCl3, 500 MHz) δ: 0.99 (s, 9H), 1.67 (s, 3H), 1.94 (s, 3H), 2.36 (m, 1H), 2.39 (s, 3H), 2.50 (s, 3H), 2.59 (s, 3H), 2.61 (m, 1H), 2.96 (m, 4H), 3.39 (m, 2H), 3.47 (m, 2H), 3.51-3.77 (m, 14H), 4.34 (m, 1H), 4.40 (t, *J* = 6.65 Hz, 4H), 4.47-4.56 (m, 2H), 4.63 (m, 1H), 4.87 (t, *J* = 7.75 Hz, 1H), 5.58 (s, 1H), 6.12 (s, 1H), 7.25-7.34 (m, 8H), 7.38-7.40 (m, 2H), 7.96 (d, *J* = 5.9 Hz, 1H), 8.67 (s, 1H). 13C NMR (CDCl3, 125 MHz) δ: 11.7, 13.1, 14.4, 16.1, 18.3, 26.4, 29.7, 30.3, 33.7, 35.4, 36.8, 37.2, 38.6, 39.6, 43.1, 53.8, 54.3, 56.7, 58.6, 62.5, 65.9, 70.0, 70.2, 70.6, 70.9, 76.8, 77.0, 77.3, 126.1, 128.0, 128.7, 129.4, 130.6, 130.8, 131.0, 131.7, 132.0, 136.0, 136.6, 136.7, 138.3, 148.4, 149.8, 150.3, 154.2, 155.7, 163.7, 167.2, 170.0, 170.7, 170.8, 170.9. LC-MS m/z Calcd. for C58H72ClN9O12S4 [1/2M+H]+ 625.7, Found 625.5.

**Supplementary Scheme 6. Synthesis of GSH-insensitive ARV771 methacrylate (Me-O-ARV771)**

**Synthesis of 2-(2-(2-hydroxyethoxy)ethoxy)ethyl methacrylate (21)**

The 2,2'-(ethane-1,2-diylbis(oxy))bis(ethan-1-ol) (commercially available, 300.2 mg, 2.0 mmol, 1.0 eq) and DIEA (775.4 mg, 6.0 mmol, 3.0 eq) were dissolved in DCM. Then, the solution of methacryloyl chloride (commercially available, 208.0 mg, 2.0 mmol, 1.0 eq) in DCM was added dropwise into the mixture, and stirred for 24 h. The reaction solution was washed by water and saturated NH4Cl solution. Then, the organic solvent was collected and dried by anhydrous Na2SO4. The raw production was further depurated by silica gel column chromatography (n-hexane: ethyl acetate = 4:1) to give compound 17 as colorless oily liquid (318.5 mg, 73% yield). 1H-NMR (CDCl3, 500 MHz) δ: 1.95 (s, 3H), 3.60-3.68 (m, 6H), 3.73 (m, 2H), 3.76 (m, 2H), 4.32 (m, 2H), 6.16 (s, 1H), 6.58 (s, 1H).

**Synthesis of 2-(2-(2-(((((3R,5S)-1-((S)-2-(tert-butyl)-15-((S)-4-(4-chlorophenyl)-2,3,9-trimethyl-6H-thieno[3,2-f][1,2,4]triazolo[4,3-a][1,4]diazepin-6-yl)-4,14-dioxo-6,10-dioxa-3,13-diazapentadecanoyl)-5-(((S)-1-(4-(4-methylthiazol-5-yl)phenyl)ethyl)carbamoyl)pyrrolidin-3-yl)oxy)carbonyl)oxy)ethoxy)ethoxy)ethyl methacrylate (23, Me-O-ARV771)**

Firstly, the 2-(2-(2-(((4-nitrophenoxy) carbonyl)oxy)ethoxy)ethoxy)ethyl methacrylate (22) was synthesized. The bis(4-nitrophenyl) carbonate (commercially available, 851.3 mg, 2.8 mmol, 1.2 eq) and DIEA (1085.6 mg, 8.4 mmol, 3.0 eq) were dissolved in DCM, and then the solution of compound 21 (305.4 mg, 1.4 mmol, 1.0 eq) in DCM was added dropwise into above solution. The reaction was continued for 6 h with the stir steadily under argon protection at room temperature. After the reaction completed, the mixture was diluted by DCM, and subsequently washed with water and saturated NH4Cl solution, dried over anhydrous Na2SO4.

Afterwards, compound 8 (98.6 mg, 0.10 mmol, 1.0 eq), compound 22 (58.1 mg, 0.15 mmol, 1.5 eq), DMAP (18.3 mg, 0.15 mmol, 1.5 eq) and DIEA (25.8 mg, 0.20 mmol, 2.0 eq) were dissolved in DCM, and stirred overnight at room temperature. The mixture was then washed with water and saturated NH4Cl solution. The organic phase was collected and dried over anhydrous Na2SO4. Afterwards, the raw product was purified by silica gel column chromatography (DCM: MeOH = 80:1~15:1) to gain compound 23 as white solid (81.1 mg, 66% yield). 1H-NMR (CDCl3, 500 MHz) δ: 1.07 (s, 9H), 1.25 (s, 3H), 1.38 (d, *J* = 6.9 Hz, 1H), 1.53 (s, 1H),1.67 (s, 1H), 1.69 (s, 3H), 1.95 (s, 3H), 2.35 (m, 2H), 2.49 (s, 3H), 2.56 (m, 2H), 2.61 (s, 3H), 3.43-4.02 (m, 20H), 4.22-4.34 (m, 4H), 4.66 (m, 2H), 4.84 (m, 1H), 5.04(m, 1H), 5.26 (m, 1H), 5.57 (s, 1H), 6.12 (s, 1H), 7.28-7.42 (m, 8H), 7.41 (m, 2H), 7.87 (m, 1H), 8.66 (s, 1H). 13C-NMR (CDCl3, 125 MHz) δ: 11.7, 13.1, 14.4, 16.1, 21.9, 26.5, 26.9, 29.2, 29.7, 30.1, 34.0, 35.8, 38.4, 39.6, 48.8, 54.2, 56.7, 58.7, 67.9, 69.2, 69.4, 70.3, 73.3, 76.8, 77.0, 77.3, 126.4, 128.7, 129.3, 129.9, 130.5, 130.9, 131.0, 131.2, 131.7, 136.4, 136.9, 143.3, 148.4, 150.0, 150.2, 155.8, 163.7, 170.0, 170.7, 170.8, 172.2. ESI m/z Calcd. for C60H76ClN9O13S2 [M+H]+ 1230.5, Found 1230.7. Calcd. for C60H76ClN9O13S2 [M+Na]+ 1252.5, Found 1252.8.

**Supplementary Scheme 7. Synthesis of macromolecular chain transfer agents mPEG113-CTA (24), mPEG113-GALGLPG-CTA (27) and N3-PEG113-GALGLPG-CTA (30)**

**Synthesis of mPEG113-CTA chain transfer agent (27)**

CDP (121.10 mg, 0.30 mM), EDCI (115.1 mg, 0.60 mM), HOBT (81.07 mg, 0.60 mM) and DIEA (77.54 mg, 0.60 mM) were dissolved in anhydrous DMF and reacted for 90 min. Then, mPEG113-NH2 (500.0 mg, 0.10 mM) was dissolved in anhydrous DMF and added into above reactant solution. After 24 h reaction at RT, the crude product was dialyzed against ethanol and DI water. The yellowish end-product was obtained by lyophilization.

**Synthesis of mPEG113-GALGLPG-CTA (26) and N3-PEG113-GALGLPG-CTA (30)**

To synthesize mPEG113-GPLGLAG and N3-PEG113-GALGLPG, Fmoc-GPLGLAG (250.0 mg, 0.30 mM), EDCI (72.40 mg, 0.37 mM), HOBT (51.01 mg, 0.37 mM) and DIEA (77.54 mg, 0.60 mM) were dissolved in anhydrous DMF, and stirred about 90 min to activate the carboxyl group. Then, mPEG113-NH2 (500.0 mg, 0.10 mM) or N3-PEG113-NH2 (500.0 mg, 0.10 mM) was dissolved in anhydrous DMF and dropwise added into above solution. The reaction was continued for 24 h at room temperature. Next, 20% (v/v) 4-Methylpiperidine was added into above mentioned mixture and stirred overnight to remove the Fmoc group. The crude product was purified by dialyzing against ethanol and DI water, and then lyophilized to obtain final product as off-white powder.

Next, CDP (121.1 mg, 0.30 mM), EDCI (115.1 mg, 0.60 mM), HOBT (81.07 mg, 0.60 mM) and DIEA (77.54 mg, 0.60 mM) were dissolved in anhydrous DMF and the mixture solution was stirred for 90 min. Then, mPEG113-GALGLPG (566.0 mg, 0.10 mM) or N3-PEG113-GALGLPG (566.0 mg, 0.10 mM) were dissolved in anhydrous DMF and added into above reactant solution. After 24 h reaction at RT, the crude product was dialyzed against ethanol and DI water. The yellowish end-product was obtained by lyophilization. The chemical structure of the resultant products was validated by 1H-NMR spectra.

**Supplementary Scheme 8. Synthesis of GSH-liable POLYTACs of ARV771**

The reduction-sensitive POLYTACs of ARV771 were prepared by reversible addition-fragmentation chain transfer (RAFT) polymerization. Briefly, mPEG113-CTA (200.0 mg, 0.037 mmol) or mPEG113-GALGLPG-CTA (200.0 mg, 0.033 mmol), DPA (466.2 mg, 2.2 mmol), Me-ARV771 (182.5 mg, 0.15 mmol) and AIBN (0.54 mg, 0.0037 mmol) were dissolved in 1.5 mL of anhydrous DMF. The polymerization for continued 24 h under 70 ℃. The product was purified via dialyzing against DI water and lyophilization. The chemical structure and molecular weights of the resultant products were examined by 1H-NMR spectra and gel permeability chromatography (GPC), respectively.

**Supplementary Scheme 9. Synthesis of GSH-activatable POLYTACs of MZ1**

To synthesize POLYTACs of MZ1, mPEG113-CTA (200.0 mg, 0.037 mmol) or mPEG113-GALGLPG-CTA (200.0 mg, 0.033 mmol), DPA (466.2 mg, 2.2 mmol), Me-MZ1 (189.0 mg, 0.15 mmol) and AIBN (0.54 mg, 0.0037 mmol) were dissolved in 1.5 mL of anhydrous DMF and stirred for 24 h under 70 ℃. The final product was gained via dialyzing against DI water and lyophilization. The chemical structure and molecular weights of the resultant products were examined by 1H-NMR spectra and GPC, respectively.

**Supplementary Scheme 10. Synthesis of mPEG113-*b*-P(DPAm-*r*-HEMAn) and mPEG113-GALGLPG*-b*-P(DPAm-*r*-HEMAn)**

mPEG113-CTA (200.0 mg, 0.037 mmol) or mPEG113-GALGLPG-CTA (200.0 mg, 0.033 mmol), DPA (466.2 mg, 2.2 mmol), HEMA (48.10 mg, 0.37 mmol) and AIBN (0.54 mg, 0.0037 mmol) were dissolved in 1.5 mL of anhydrous DMF. The RAFT polymerization was sustained 24 h under 70 ℃. The product was obtained through dialyzing against DI water and lyophilization. The chemical structure and molecular weights of the resultant products were examined by 1H-NMR spectra and GPC, respectively.

**Supplementary Scheme 11. Synthesis of mPEG113-P(DPA m-*r*-PPan) and mPEG113-GALGLPG*-* P(DPA m-*r*-PPan)**

Briefly, PPa (93.24 mg, 0.175 mM), DMAP (42.95 mg, 0.35 mM), EDCI (67.10 mg, 0.35 mM), and DIEA (45.27 mg, 0.35 mM) were dissolved in anhydrous DMF and the reaction was continued for 90 min. Afterwards, mPEG113-*b*-P(DPAm-*r*-HEMAn) (200.0 mg, 0.012 mmol) or mPEG113-GALGLPG*-b*-P(DPAm-*r*-HEMAn) (201.4 mg, 0.012 mmol) dissolved in anhydrous DMF was added dropwise into above mixture, and stirred for 24 h at RT. The reaction solution was then dialyzed against DMSO and water, and lyophilized to obtain PPa-labled diblock copolymers. The chemical structure and molecular weights of the resultant products were examined by 1H-NMR spectra and GPC, respectively.

**Supplementary Scheme 12. Synthesis of GSH-insensitive POLYTAC of mPEG113-GALGLPG*-*P(DPAm-*r*-O-ARV771n)**

The mPEG113-GALGLPG-CTA (200.0 mg, 0.033 mmol), DPA (466.2 mg, 2.2 mmol), Me-O-ARV771 (179.8 mg, 0.15 mmol) and AIBN (0.54 mg, 0.0037 mmol) were dissolved in 1.5 mL of anhydrous DMF. Undergoing stirred persistently for 24 h at 70℃, the reaction solution was purified via dialyzing against DI water and lyophilized to obtain the final product. The chemical structure and molecular weights of the resultant products were examined by 1H-NMR spectra and GPC, respectively.

**Supplementary Scheme 13. Synthesis of mPEG113-P(EPAm-*r*-DBCOn) and mPEG113-P(EPAm-*r*-PPan)**

To synthesize ethylpropylaminoethyl (EPA) methacrylate, N-ethylpropan-1-amine (3.5 g, 0.04 mol), 2-bromoethanol (5.0 g, 0.04 mol) and potassium carbonate (16.6 g, 0.12 mol) were dissolved in acetonitrile, the mixture solution was stirred overnight at RT. After filtered to remove the potassium carbonate, the reaction mixture was condensed by vacuum evaporation. Secondly, the above crude product was dissolved in anhydrous DCM, methacryloyl chloride (5.2 g, 0.05 mol) in anhydrous DCM was added dropwise under constant pressure and ice bath. After the reaction was finished, the triethylamine-HCl salts and solvent was removed by filtration and vacuum evaporation. The final product was obtained by vacuum distillation as colorless liquid.

To prepare mPEG113-*b*-P(EPAm-*r*-HEMAn) diblock copolymer, mPEG113-CTA (200.0 mg, 0.037 mmol), EPA methacrylate (517.4 mg, 2.6 mmol), HEMA (48.10 mg, 0.37 mmol) and AIBN (0.54 mg, 0.0037 mmol) were dissolved in 1.5 mL of anhydrous DMF. The RAFT polymerization was continued for 24 h under 70 ℃. Then, the final product was purified by dialyzing against DI water and freeze dried.

To prepare mPEG113-P(EPAm-*r*-DBCOn) and mPEG113-P(EPAm-r-PPan), DBCO-acid (50.47 mg, 0.165 mM) or PPa (29.37 mg, 0.055mM), DMAP (8.060 mg, 0.33 mM), EDCI (12.65 mg, 0.33 mM), and DIEA (8.8 mg, 0.33 mM) were dissolved in anhydrous DMF. After stirring for 90 min, the DMF solution of mPEG113-*b*-P(EPAm-*r*-HEMAn) (200.0 mg, 0.011 mmol) was added dropwise into the mixture, and stirred continued for 24 h at RT. Then, the product was obtained by dialyzing against DMSO/DI water, and lyophilization. The chemical structure of the intermediates and final products was examined by 1H-NMR spectra. The molecular weights of the resultant diblock copolymers were determined by GPC measurement.

**Scheme S14. Synthesis of** **N3-PEG113-GALGLPG*-b*-P(DPAm-*r*-HEMAn)**

N3-PEG113-GALGLPG-CTA (200.0 mg, 0.033 mmol), DPA (466.2 mg, 2.2 mmol), HEMA (48.1 mg, 0.37 mmol) and AIBN (0.54 mg, 0.0037 mmol) were dissolved in 1.5 mL of anhydrous DMF. The RAFT polymerization was continued for 24 h at 70 ℃, and the final product was purified by dialyzing against DI water and lyophilizing. The chemical structure and molecular weights of the resultant diblock copolymer were determined by 1H-NMR spectra and GPC measurement, respectively.

**Preparation of the POLYTAC and pretargeted nanoparticles**

Briefly, mPEG113-GALGLPG-*b*-P(DPA42-*r*-ARV7712) (2.0 mg) and mPEG113-GALGLPG-*b*-P(DPA48-*r*-HEMA7) (1.0 mg) were dissolved in 100 μL of DMF, and the mixture was added into 1 mL of DI water under ultrasonication to obtain the POLYTAC nanoparticles (termed as PGD7 nanoparticles). The organic solvent was removed by dialyzing against DI water. One set of the POLYTAC nanoparticles were prepared by following the same procedure:

POLY-ARV77 nanoparticles (PD7): mPEG113-*b*-P(DPA46-*r*-ARV7712) + mPEG113-*b*-P(DPA52-*r*-HEMA6);

MMP-2-liable POLY-ARV77 nanoparticles (PGDA7): mPEG113-GALGLPG-*b*-P(DPA46-*r* ARV7712) + mPEG113-GALGLPG-*b*-P(DPA48-*r*-PPa4);

PPa-labelled POLY-ARV771 nanoparticles (PDA7): mPEG113-*b*-P(DPA46-*r*-ARV7712) + mPEG113-*b*-P(DPA52-*r*-PPa4);

POLY-MZ1 nanoparticles (PDM): mPEG113-*b-*P(DPA42-*r*-MZ12) + mPEG113-*b*-P(DPA52-HEMA6);

MMP-2-liable POLY-MZ1 nanoparticles (PGDM): mPEG113-GALGLPG-*b*-P(DPA46-*r*-MZ12) + mPEG113-GALGLPG-*b*-P(DPA48-*r*-HEMA7);

DBCO-loaded pretargeted nanoparticles (PEA): mPEG113-*b*-P(EPA60-*r*-DBCO4) (namely PED) and mPEG113-*b*-P(EPA60-*r*-PPa1);

To prepare the azide-functionalized POLY-ARV771 nanoparticles (N3@PGDA7): mPEG113-GALGLPG-*b*-P(DPA42-*r*-ARV7712) (1.7 mg) + mPEG113-GALGLPG-*b*-P(DPA48-*r*-PPa4) (0.85 mg) + N3-PEG113-GALGLPG-*b*-P(DPA41-*r*-mPEG113-GALGLPG-*b*-P(DPA48-*r*-PPa4) (0.45 mg) were dissolved into 100 μL of DMF, and added into 1 mL of DI water under ultrasonication. Then, DMF was removed via dialyzing against DI water to obtain the N3@PGDA7 nanoparticles.

**Physio-chemical characterization of the POLYTAC, N3@POLYTAC and pretargeted nanoparticles**

Hydrodynamic diameter and morphology of the micellar nanoparticles were investigated by dynamic light scattering (DLS) (Zetasizer Nano ZS90, Malvern Instrument, UK) and transmission electron microscopy (TEM) examination (Talos L120C, USA, 120 kV).

The fluorescence emission profile of the PPa-labelled micelle suspension was examined by microplate reader (Perkin Elmer Enspire, USA), and the fluorescence images were recorded by IVIS imaging system (Xenogen, Alameda, CA).

To demonstrate reduction sensitivity of the POLYTAC nanoparticles, ARV771 release from ARV771 methyl methacrylate (Me-ARV771) was investigated *in vitro.* Briefly, Me-ARV771 (50 μM) was incubated with 10 mM of DTT (MeOH: H2O = 1:1, v/v) for pre-determined time duration at 37 ℃, the concentration of ARV771 released was examined by HPLC measurement (mobile phase: A: MeOH, C: H2O with 0.1% TFA; flow rate: 1 mL/min; column temperature: 30 ℃; UV: 254 nm; elute gradient: 0-10 min, from 5%A to 95% A; 15-20 min, from 95%A to 5%A).

**The PROTAC release profile of the POLYTAC nanoparticle in *vitro***

To evaluate ARV771 release profile of the POLY-ARV771 nanoparticle, the suspension of PGD7 nanoparticles was dialyzed against 1% (wt) Tween 80-containing buffer solution at 37 ℃ (MWCO 3500 Da; e.g., pH [6.0 without](mailto:6.0%20and%200mM) GSH, pH 6.0 + 10 mM GSH; pH 7.4 [without](mailto:6.0%20and%200mM) GSH, pH 7.4 + 10 mM, was added in each buffer). ARV771 concentration in the buffer solution was examined by HPLC measurement at the predetermined time points (e.g., 0.5, 1.0, 2.0, 4.0, 8.0, 12 and 24 h).

**Western blot assay**

To investigate protein degradation *in vitro*, MBA-MB-231 tumor cells were incubated with free PROTACs or POLYTAC nanoparticles at the predetermined condition. The cells were then lysed in RIPA lysis buffer (50 mM Tris-HCl pH 7.4, 150 nM NaCl, 1% NP-40, 0.1% SDS) including 1 mM of PMSF. The protein lysate was obtained by centrifugation at 12000 rpm for 15 min at 4 °C. Then, the lysates were denatured at 100 °C and resolved by SDS-polyacrylamide gel electrophoresis (SDS-PAGE). The gels were blotted onto PVDF membrane (Merck Millipore) and blocked by 5% BSA buffer for 2 h at room temperature. After incubated with the indicated primary antibodies at 4 ℃ overnight, the membrane was washed several times with TBST buffer, incubated with corresponding secondary antibody in 5% BSA solution for 1 h at room temperature, washed several times with TBST buffer, and then imaged with Bio-Rad Chemi Doc XRS imaging system.

**Cell proliferation assay**

To investigate the cytotoxicity of the POLYTAC nanoparticles *in vitro*, 1 × 104 MDA-MB-231 cells were cultured in 96-well cell culture plate for 24 h, the cells were then treated with free PROTAC or POLYTAC nanoparticles at predetermined condition for 72 h. The cell viability was then examined by CCK-8 assay.

**Cellular uptake and tumor penetration analysis in *vitro***

To investigate cellular uptake profile of the POLYTAC nanoparticles, MDA-MB-231 cells cultured in 24-well tissue culture plate were incubated with various POLYTAC nanoparticles at the identical PPa concentration of 5.0 μM for the desired time durations (e.g., 2, 4, 8, 12, 24 h, respectively), the intracellular fluorescence intensity were then examined by flow cytometry (BD FACS Fortessa, BD, USA). The intracellular distribution of the POLYTAC nanoparticles was investigated by confocal laser scanning microscopy (CLSM) examination.

The three-dimensional (3D) multicellular spheroid (MCS) of the MDA-MB-231 breast tumor was employed to illustrate the tumor penetration profiles of the POLYTAC nanoparticles *in vitro*. Briefly, the 3D tumor spheroids were prepared by culturing MDA-MB-231 cells in 48-well tissue culture plate (2000 cells/well) on 1% agarose gel. The 3D tumor spheroids were then incubated with the PGDA7 and PDA7 (MMP-2 pretreated) nanoparticles for 12 h. Nanoparticle distribution inside the tumor spheroids was then investgiated by CLSM examination at the predetermined time points.

**Laser irradiation-induced ROS generation *in vitro***

To investigate photoactivity of the PPa-labeled POLYTAC nanoparticles, 671 nm laser irradiation-induced ROS generation was examined. Briefly, the PGDA suspension with different PPa concentration (e.g., 2.5, 5.0, or 10 μM) was incubated in pH 6.0 or pH 7.4 buffer solution for 30 min, and then added with the singlet oxygen sensor green (SOSG, 5.0 μM). The micellar suspension was then irradiated with 671 nm laser at different photodensity (e.g., 100, 200 or 400 mW/cm2) for 1 min, and the fluorescence intensity of SOSG were detected by microplate reader (Perkin Elmer Enspire, USA).

To examine the photoactivity *in vitro*, MDA-MB-231 cells were culture in 24-well tissue culture plate for 24 h, incubated with the PGDA nanoparticles for 12 h, and then incubated with DCFH-DA (10 μM) for 30 min. The cells were thereafter irradiated with 671 nm laser for 1 min at varied photodensity (e.g., 100, 200, 400 mW/cm2), and the intracellular fluorescence intensity of DCF was analyzed by flow cytometry. Laser irradiation induced intracellular ROS generation was validated by CLSM examination.

**Biodistribution of the nanoparticles *in vivo***

MDA-MB-231 breast tumor model was established by subcutaneously injecting 100 μL of cell suspension (1 × 107 cells, DMEM: Matrigel = 1:1, v/v) into the fat pad of the Balb/c nude mice (female, 4 weeks, 18 ~ 20 g). The tumor-bearing mice were randomly grouped when the tumor volume reached ~ 200 mm3 and intravenously (i.v.) injected with PPa-labelled POLYTAC nanoparticles at an identical PPa dose of 5.0 mg/kg. Then, fluorescence imaging was collected with the IVIS imaging system at predetermined time points (Xenogen, Alameda, CA)., The mice were sacrificed at 48 h post-injection, the major organs and tumor tissue were harvested for fluorescence imaging ex-vivo. Afterwards, the tumor tissues were fixed, sectioned and stained with identified antibodies and DAPI, the fluorescence signal of the tumor sections were measured by CLSM examination.

**Bioorthogonal click reaction-enhanced tumor distribution of the POLYTAC nanoparticles *in vivo***

To investigate bioorthogonal click reaction-enforced tumor accumulation of the POLYTAC nanoparticles, the tumor-bearing nude mice were divided into three groups when the tumor volume reached ~ 200 mm3 (n = 3). The DBCO-loaded pretargeted (PED) nanoparticle was i.v. injected at a DBCO dose of 1.0 mg/kg, and the N3@PGDA7 nanoparticle was i.v. injected 2 h post PED administration at an ARV771 dose of 10 mg/kg. The biodistribution of PED and N3@PGDA7 was then examined by IVIS fluorescence imaging systems *in vivo*.

To evaluate in-situ bioorthogonal click reaction enhanced tumor distribution of PROTAC, the tumor-bearing mice were i.v. injected with the POLYTAC nanoparticles and sacrificed at the predetermined time points (12, 24, 36, 48 h). The major organs (e.g., heart, liver, spleen, lung and kidney) and tumor tissue were harvested and homogenized. ARV771 was extracted with methanol, examined by HPLC measurement and normalized with tissue mass.

**Anti-tumor study in *vivo***

The anti-tumor performance of the POLYTAC nanoparticle was evaluated in MDA-MB-231 orthotropic tumor model *in vivo*. The female Balb/c nude mice were s.b. injected with 100 μL of cell suspension (1 × 107 cells, DMEM: Matrigel = 1:1, v/v). The tumor volume reached 100 mm3 at 15-days post inoculation. The tumor-bearing mice were randomly grouped (n = 5), and i.v. injected with PBS, ARV771, or PGD7 nanoparticle at an identical ARV771 dose of 10 mg/kg for five cycles at a time interval of 3 days. The tumor volume was monitored for 30-days post treatment.

To investigate the antitumor performance of the bioorthogonal POLYTAC nanoparticles, the tumor-bearing mice were randomly grouped when the tumor volume reached 100 mm3 (n = 5), the tumor-bearing mice were then i.v. injected with PBS, ARV771, PGD7, or PED + N3@PGD7 every three days at an identical ARV771 dose of 10 mg/kg, and DBCO dose of 1.0 mg/kg for five cycles (PED was injected 2 h pre- POLYTAC nanoparticle administration).

To investigate the antitumor performance of POLYTAC nanoparticle-performed combinatory therapy, the POLYTAC nanoparticles were labelled with photosensitizer PPa for photodynamic therapy. The tumor-bearing mice were grouped when the tumor volume reached 100 mm3 (n = 5), and then i.v. injected with PBS, ARV771, PED + N3@PGDA, PED + N3@PGD7 or PED + PGDA7 at the identical ARV771 dose of 10.0 mg/kg, PPa dose of 5.0 mg/kg and DBCO dose of 1.0 mg/kg, respectively (PED was i.v. injected 2 h pre-administration of the N3@PGD7 nanoparticles). Thirty-six hours post nanoparticle injection, the mice of the PED + N3@PGDA and PED + PGDA7 groups were treated with 671 nm laser irradiation at photodensity of 400 mW/cm2 for 5 min. The treatment was repeated for five cycles at a time interval of three days. The tumor volume and body weights of the animals were monitored during the whole experimental period. The mice were considered death when the tumor volume reached 1500 mm3 according to the animal ethics of our institute and animal welfare. The tumors and the major organs (*e.g.*, hearts, livers, lungs, spleens and kidneys) of mice were harvested at the end of the antitumor studies, and examined by H&E and TUNEL staining. POLYTAC nanoparticle-mediated BRD4 degradation in the tumor tissue was validated by western blot assay of the tumor lysate. The tumor volume was calculated with the formula below:

*V = L×W×W/2 (L, the longest dimension; W, the shortest dimension).*

**Statistical Analysis.**

All data were given as Mean ± S.D. The GraphPad Prism software 8.0 was used for the statistical analyses. Two-tailed Student’s t-test was used for the statistical comparison between the two groups. One-way analysis of variance (ANOVA) with a Tukey post hoc test was used for statistical comparison among multiple (more than two) groups. Two-sided log-rank (Mantel-Cox) test was used for the statistical comparison of the survival study. Statistical significance was set at p < 0.05 (* p < 0.05, ** p < 0.01, *** p < 0.001, **** p < 0.0001). All the results are shown as mean ± s.d.

**Supplementary Table 1.** 1H-NMR spectrum and GPC-determined molecular weights of the diblock copolymers and POLYTACs synthesized in this study.

| Copolymer | 1H-NMR | GPC (Da) | | PDI |
| --- | --- | --- | --- | --- |
| *Mn* (Da) | *Mw* (Da) | *Mn* (Da) | (*Mw/Mn*) |
| PGD7 | 17412 | 17776 | 13864 | 1.28 |
| PD7 | 17649 | 17109 | 13549 | 1.26 |
| PGDM | 17444 | 17508 | 13487 | 1.29 |
| PDM | 16829 | 16249 | 12789 | 1.27 |
| PGDH | 16913 | 16598 | 13266 | 1.25 |
| PGDA | 19324 | 18756 | 13106 | 1.43 |
| PGDO7 | 16966 | 15334 | 11724 | 1.30 |
| N3PGDH | 15430 | 14669 | 11808 | 1.24 |
| PED | 19400 | 19243 | 15566 | 1.23 |

*all the diblock copolymers by GPC using a mobile phase of tetrahydrofuran (THF) at a flow rate of 1.0 mL/min and temperature of 35 ℃.

PGD7: mPEG113-GALGLPG-*b*-P(DPA42-*r*-ARV7712);

PD7: mPEG113-*b*-P(DPA46-*r*-ARV7712);

PGDM: mPEG113-GALGLPG-*b*-P(DPA45-*r*-MZ12);

PDM: mPEG113-*b*-P(DPA42-*r*-MZ12);

PGDH: mPEG113-GALGLPG-*b*-P(DPA48-*r*-HEMA7);

PGDA: mPEG113-GALGLPG-*b*-P(DPA48-*r*-HEMA7-PPa4);

PGDO7: mPEG113-GALGLPG-*b*-P(DPA40-*r*- oARV7712);

N3PGDH: N3-PEG113-GALGLPG-*b*-P(DPA41-*r*-HEMA7);

PED: mPEG113-*b*-P(EPA60-*r*-HEMA6-DBCO4).

**
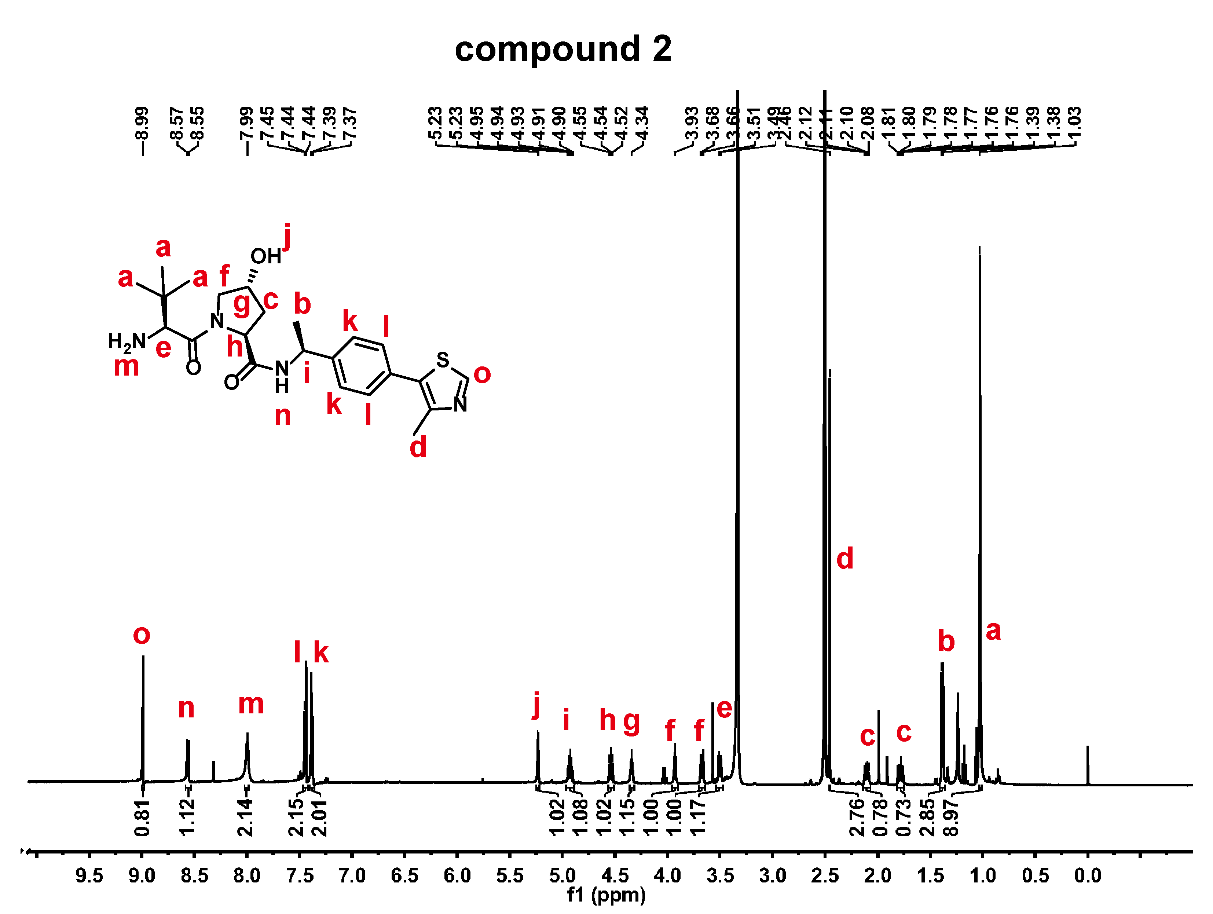
**

**Supplementary Figure 1.** 1H-NMR spectrum of compound 2 (CDCl3).

**
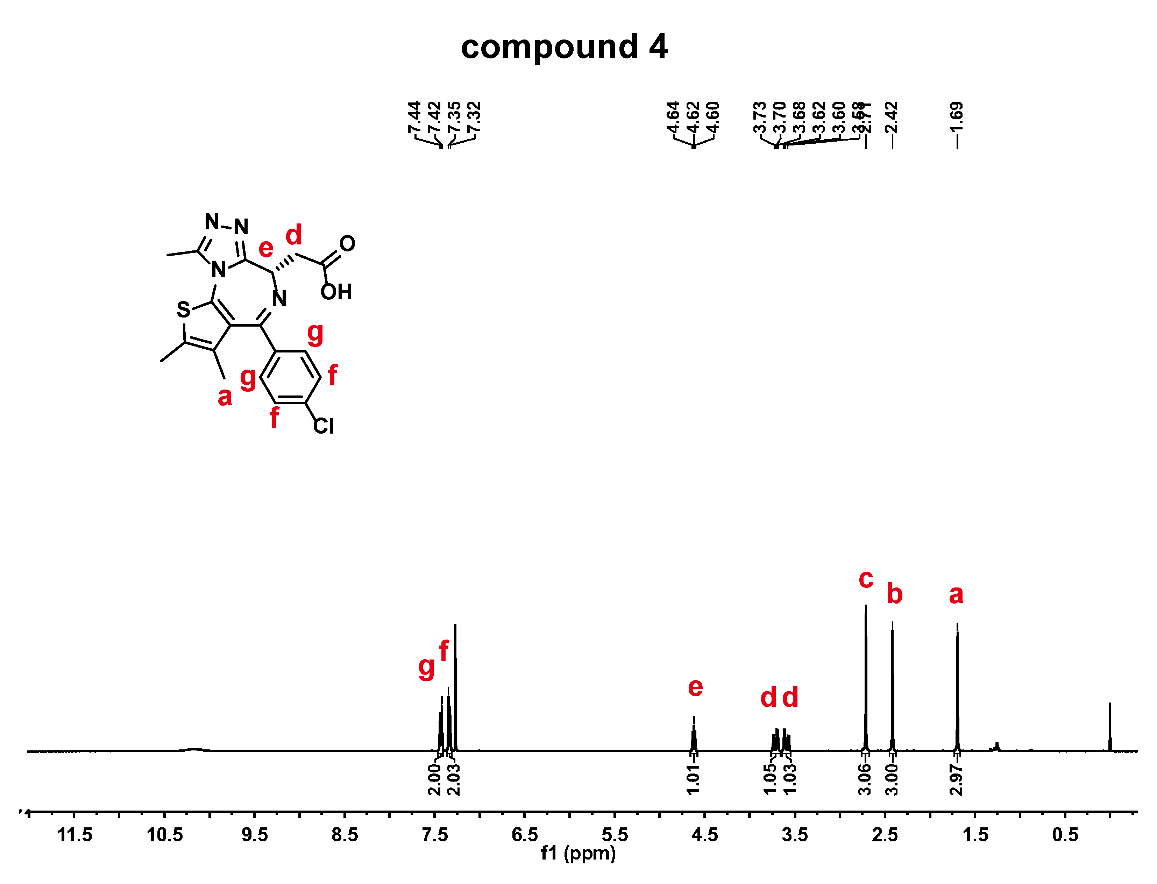
**

**Supplementary Figure 2.** 1H-NMR spectrum of compound 4 (CDCl3).

**
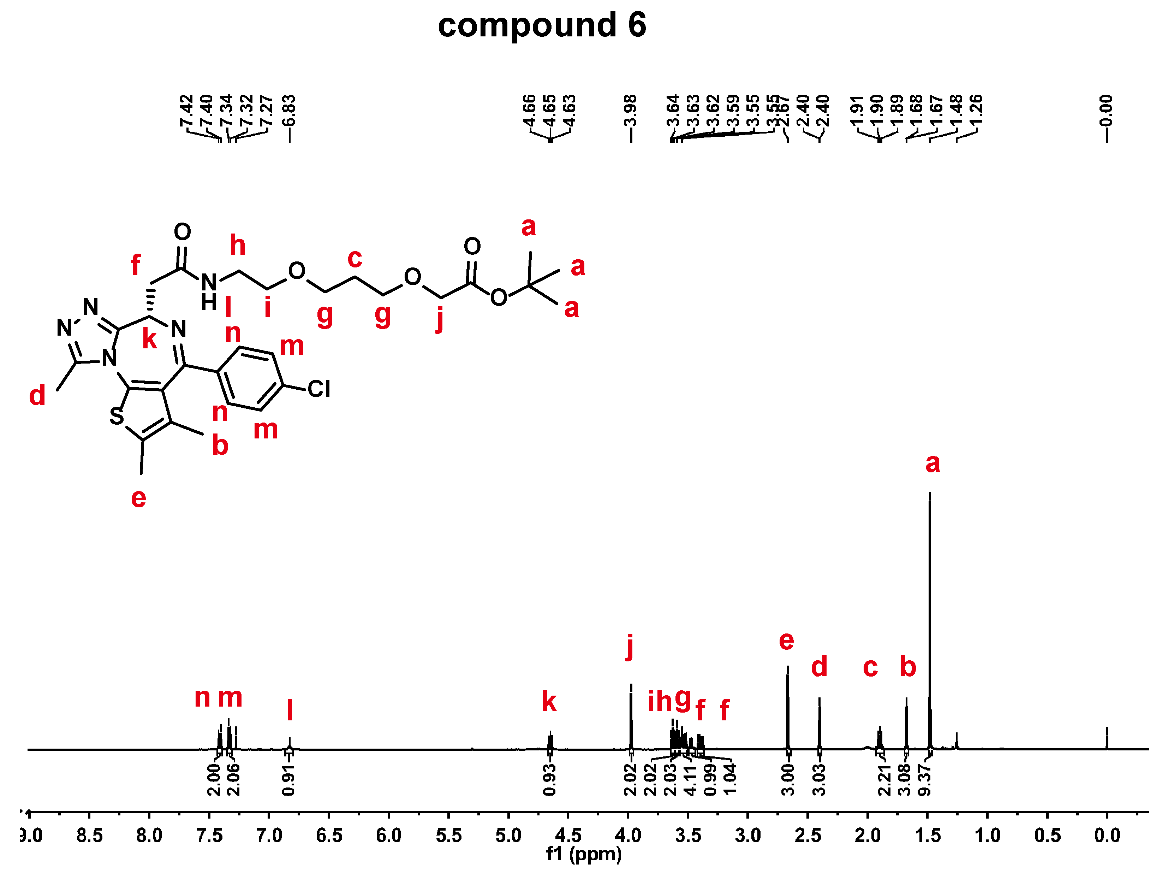
**

**Supplementary Figure 3.** 1H-NMR spectrum of compound 6 (CDCl3).

**
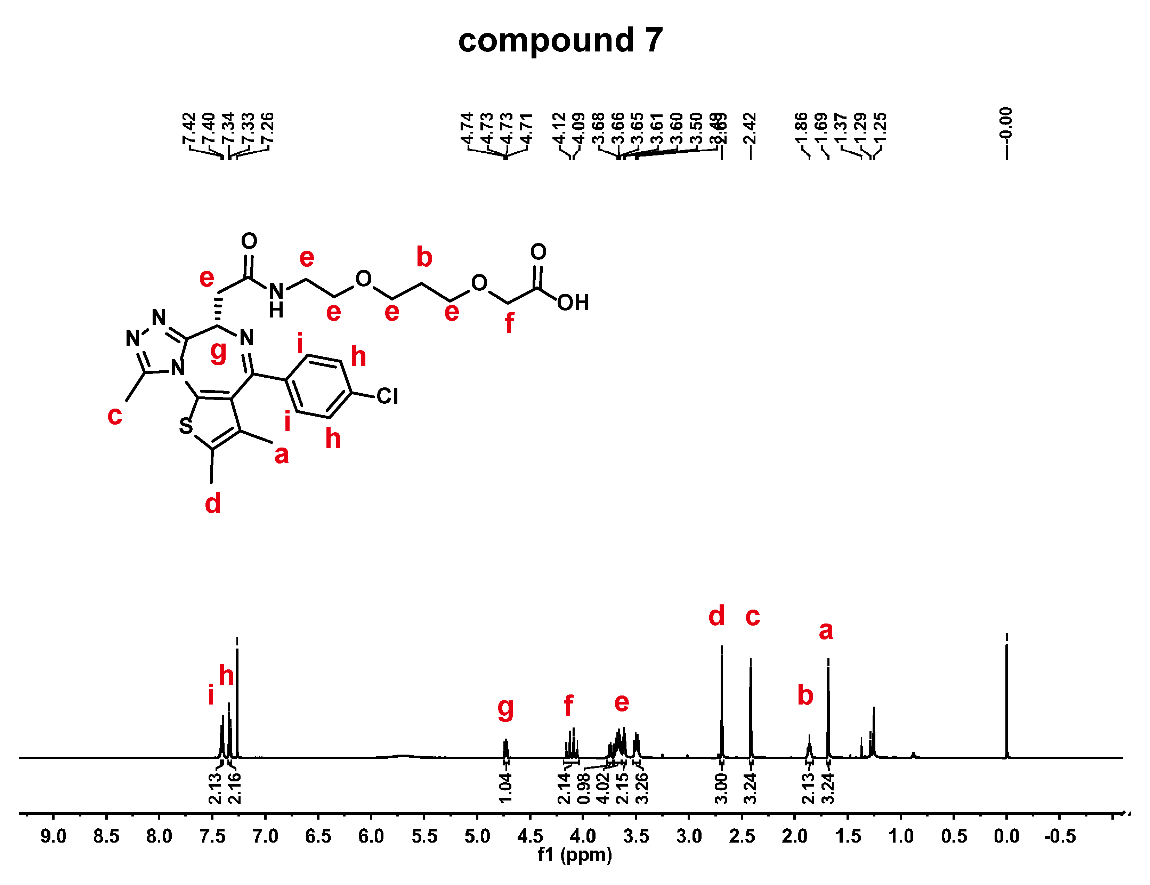
**

**Supplementary Figure 4.** 1H-NMR spectrum of compound 7 (CDCl3).

**
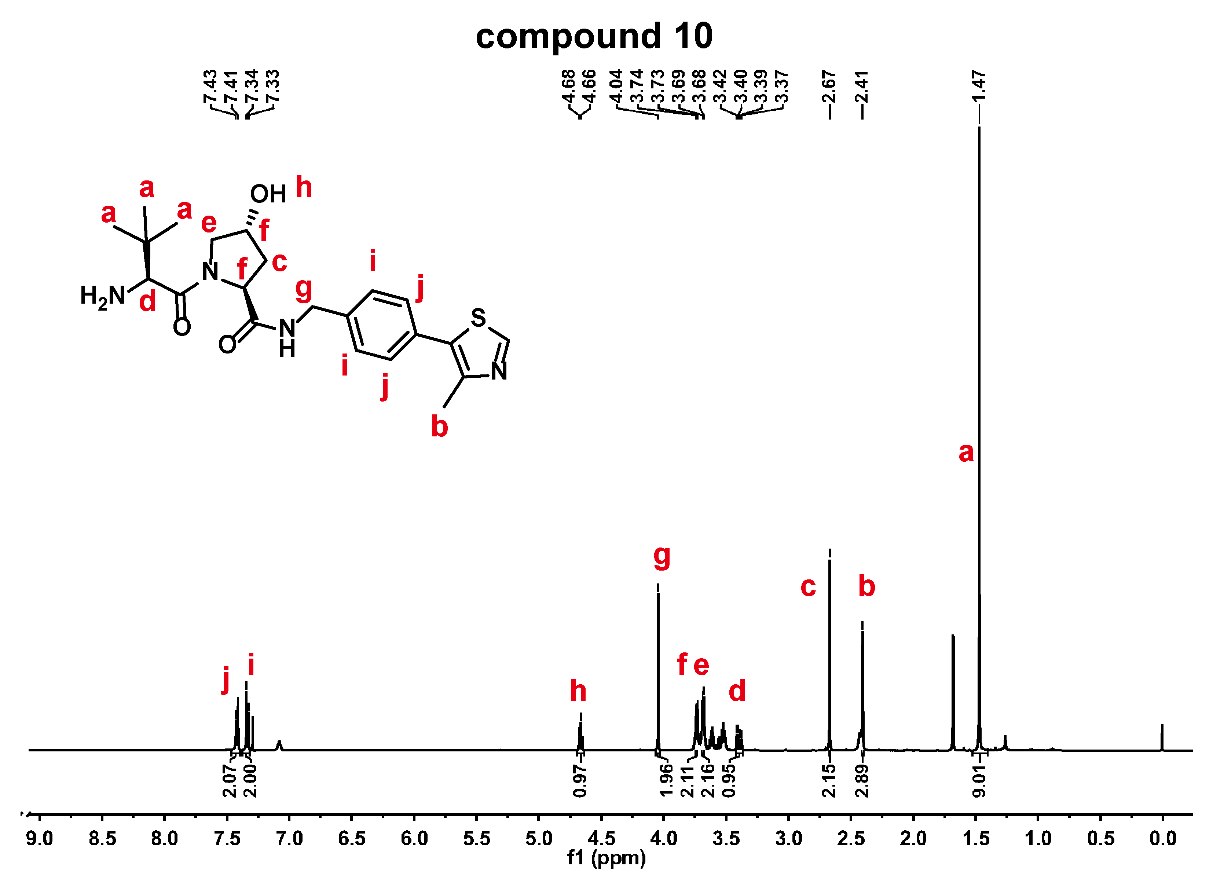
**

**Supplementary Figure 5.** 1H-NMR spectrum of compound 10 (CDCl3).

**
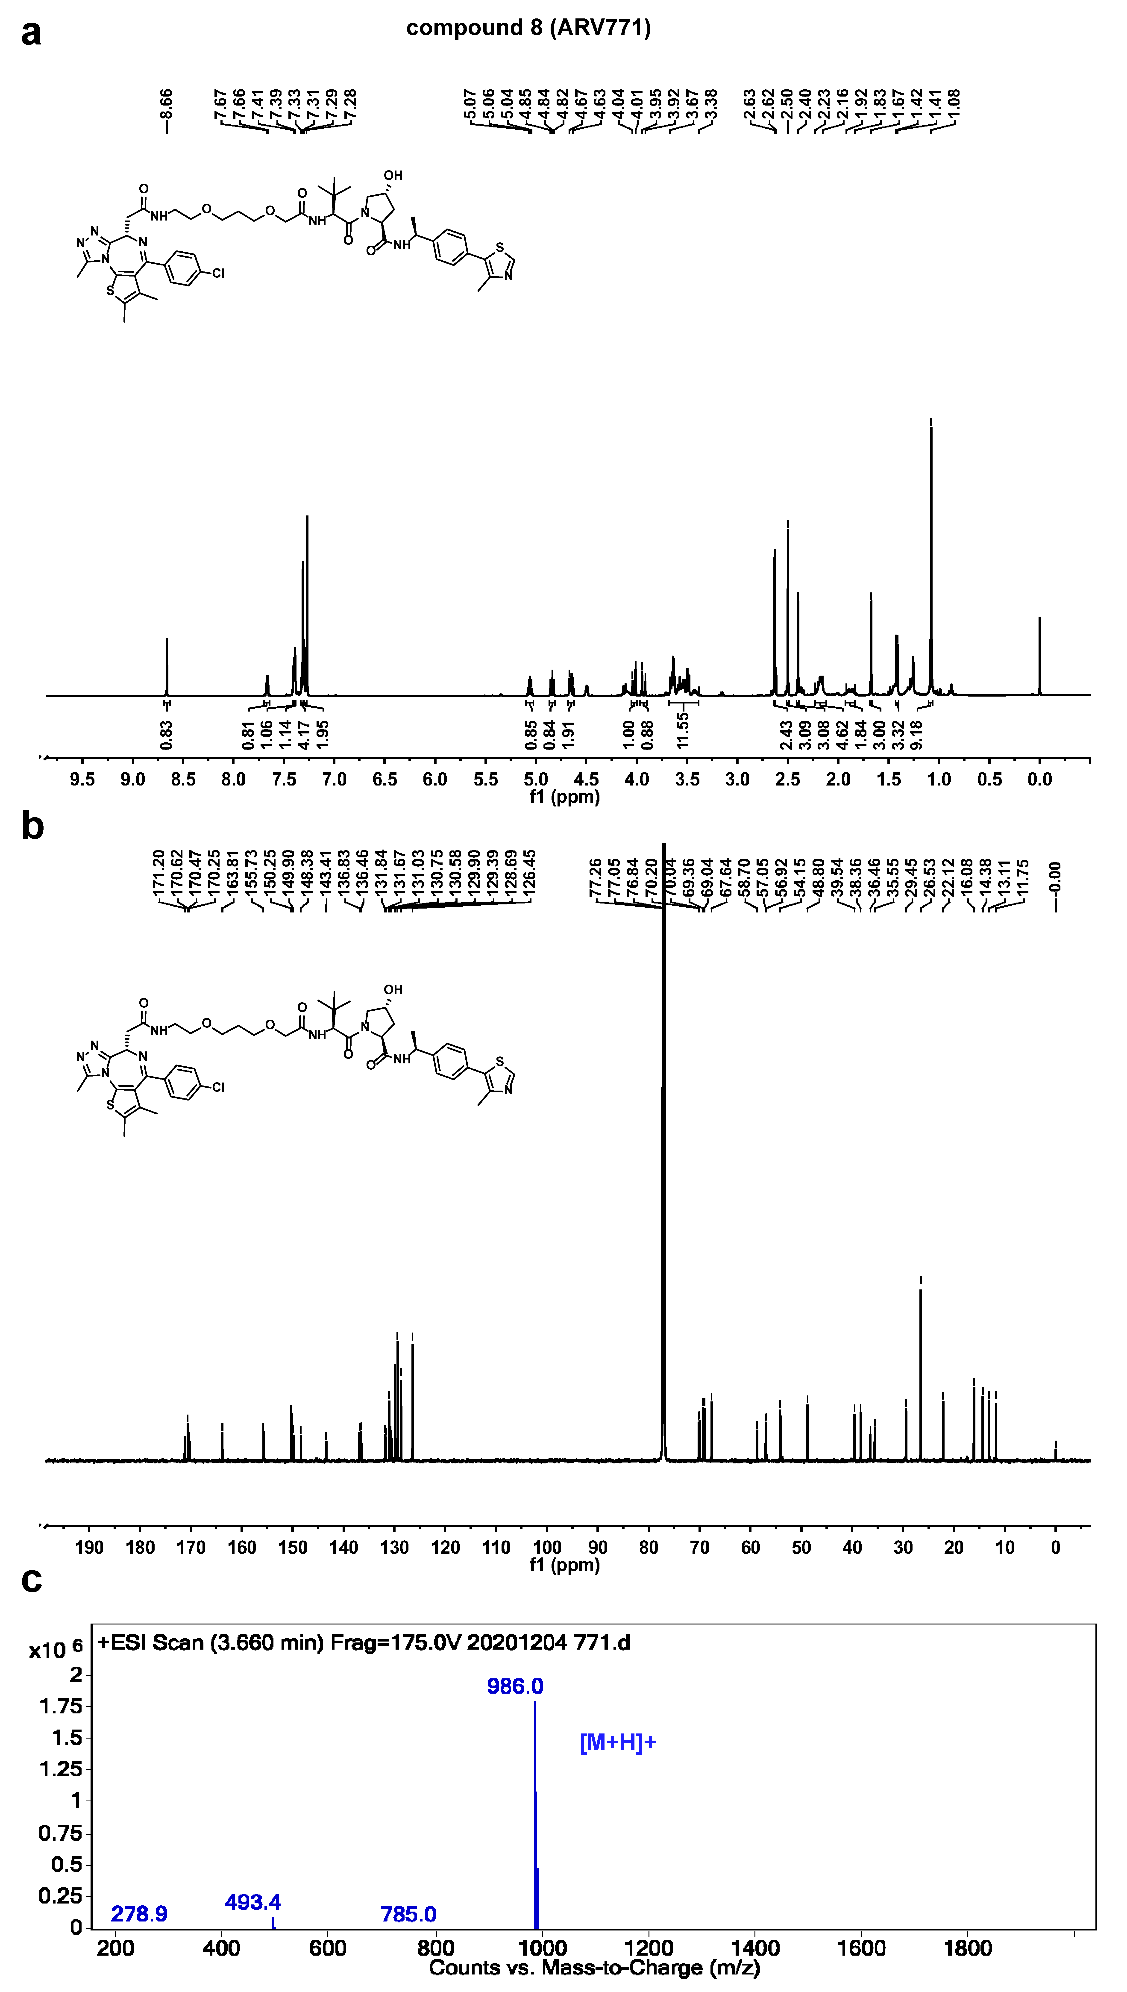
**

**Supplementary Figure 6. a,** 1H-NMR spectrum, **b,** 13C-NMR spectrum (CDCl3), and (**c**) mass spectrum of ARV771.


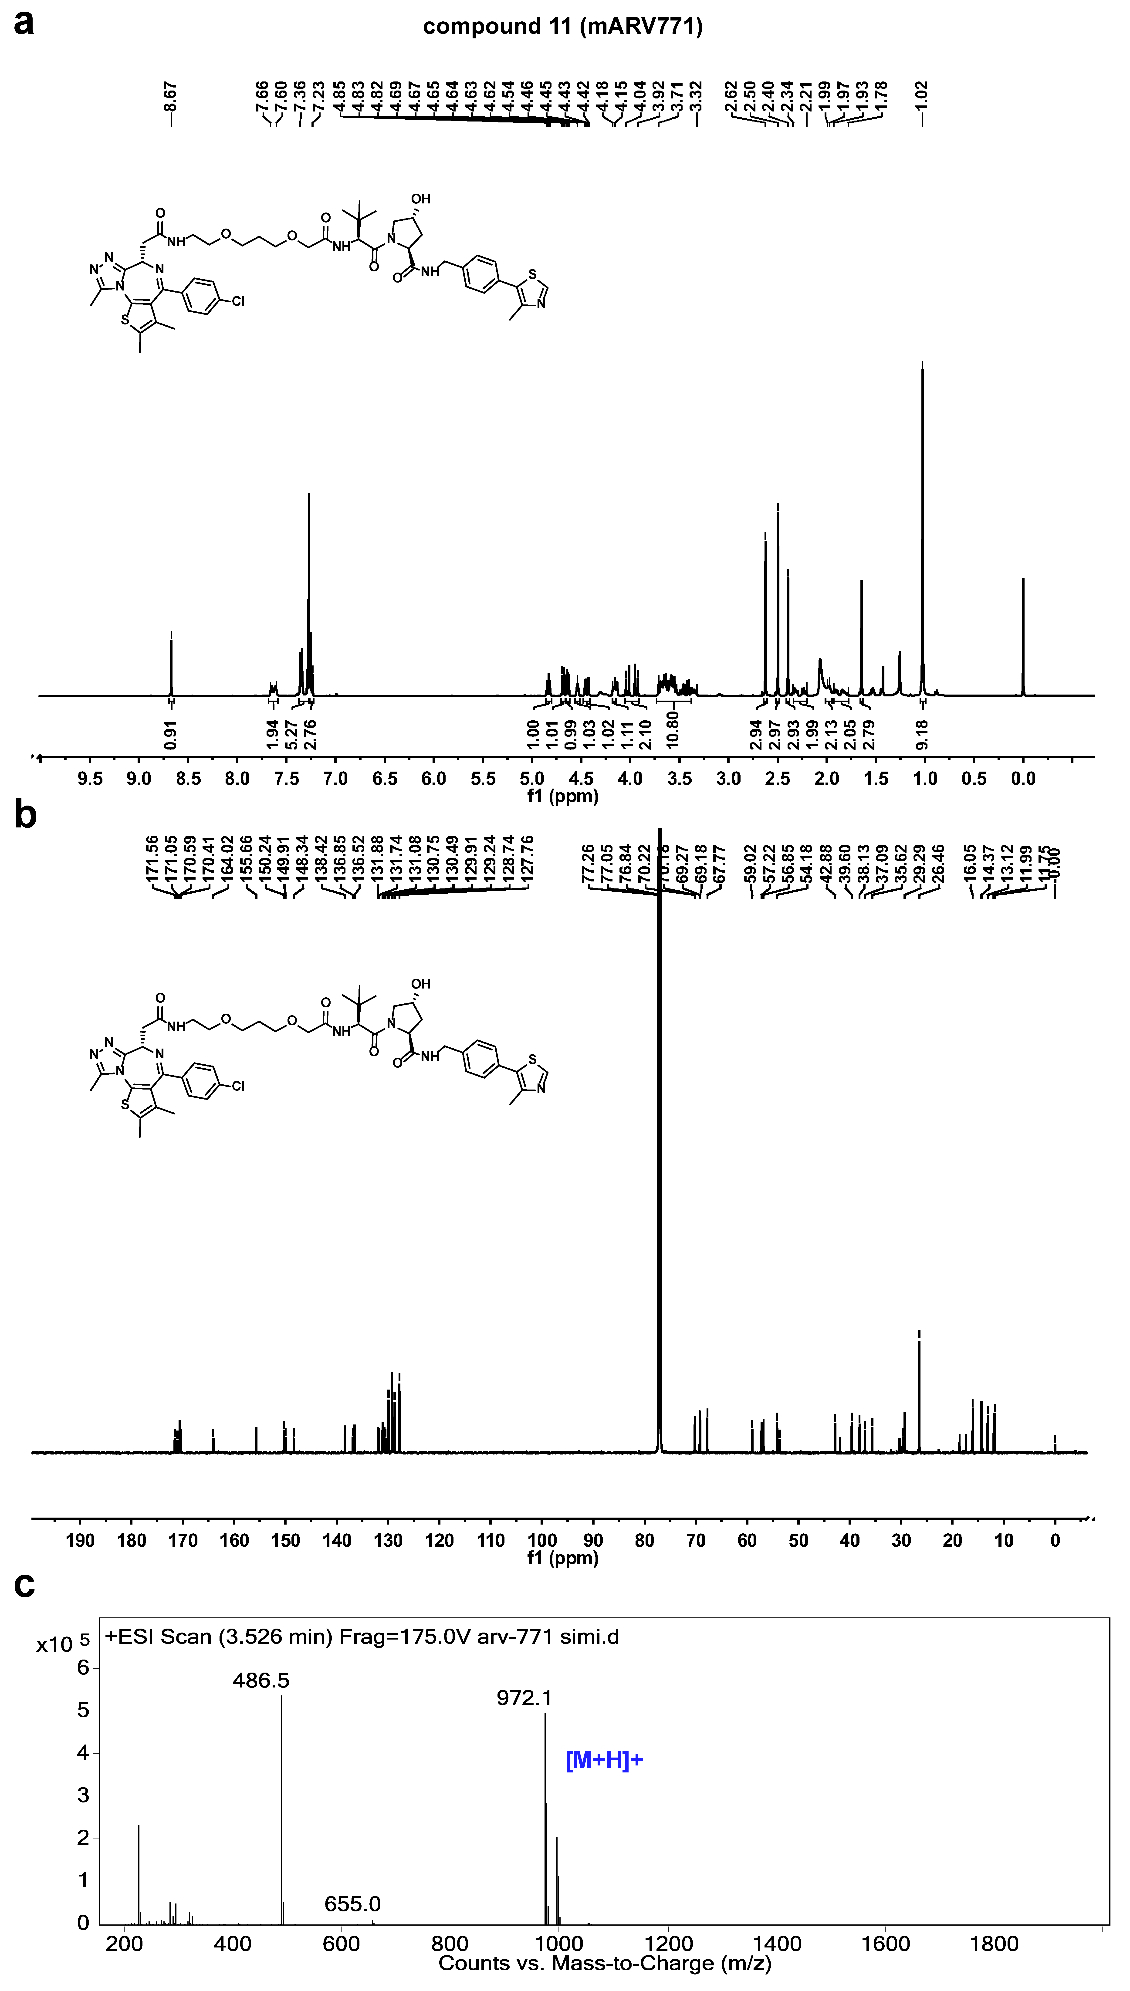


**Supplementary Figure 7. a,** 1H-NMR spectrum (CDCl3), **b,** 13C-NMR spectrum, and (**c**) mass spectrum of mARV771.

**
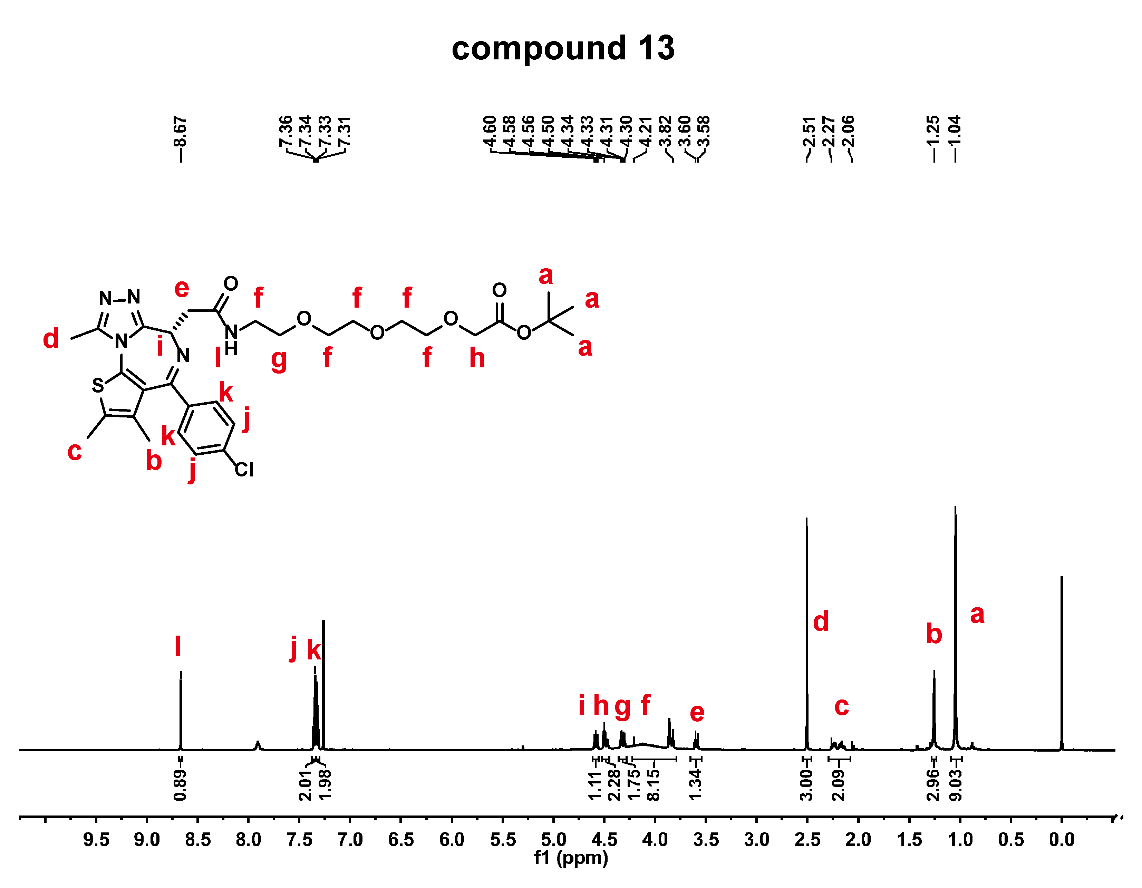
**

**Supplementary Figure 8.** 1H-NMR spectrum of compound 13 (CDCl3).


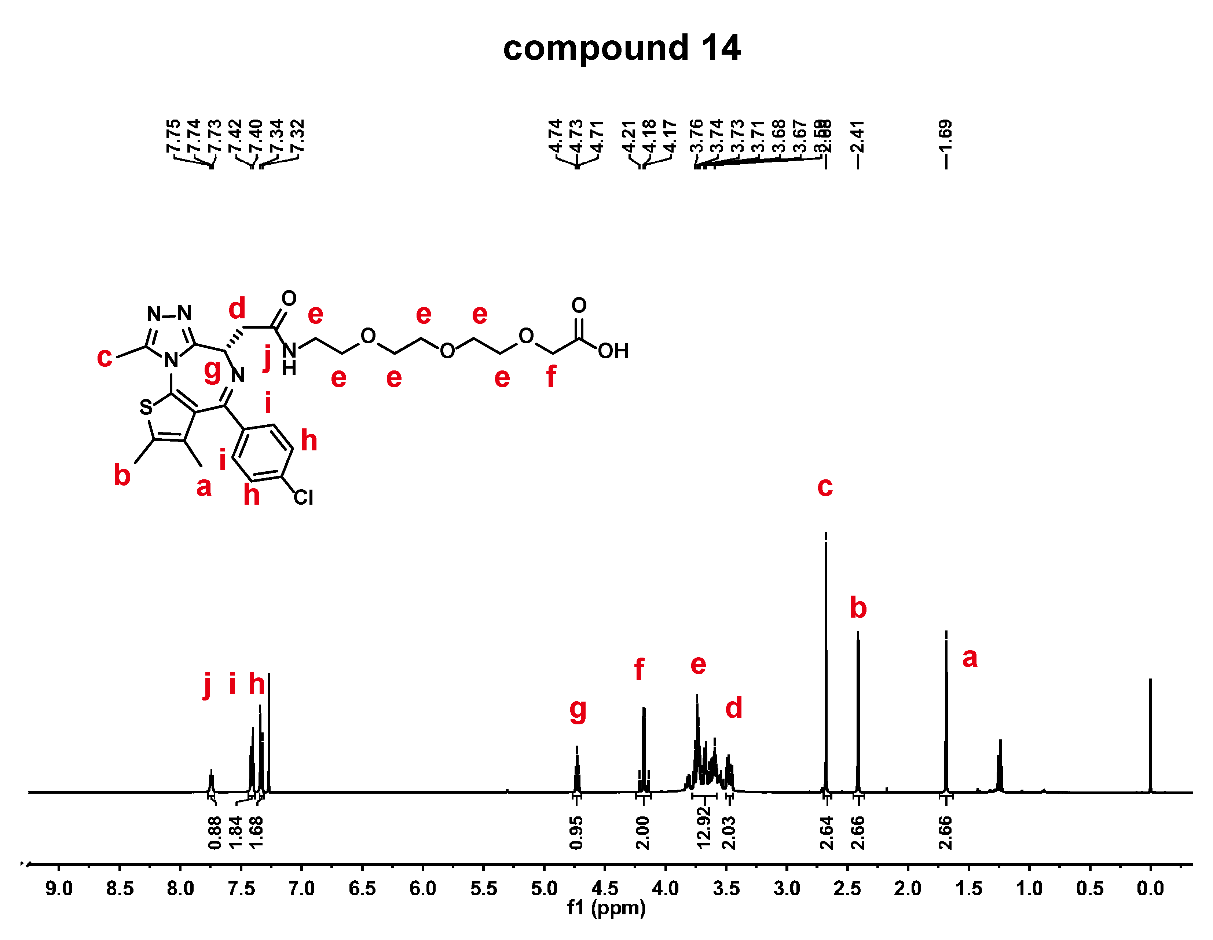


**Supplementary Figure 9.** 1H-NMR spectrum of compound 14 (CDCl3).

**
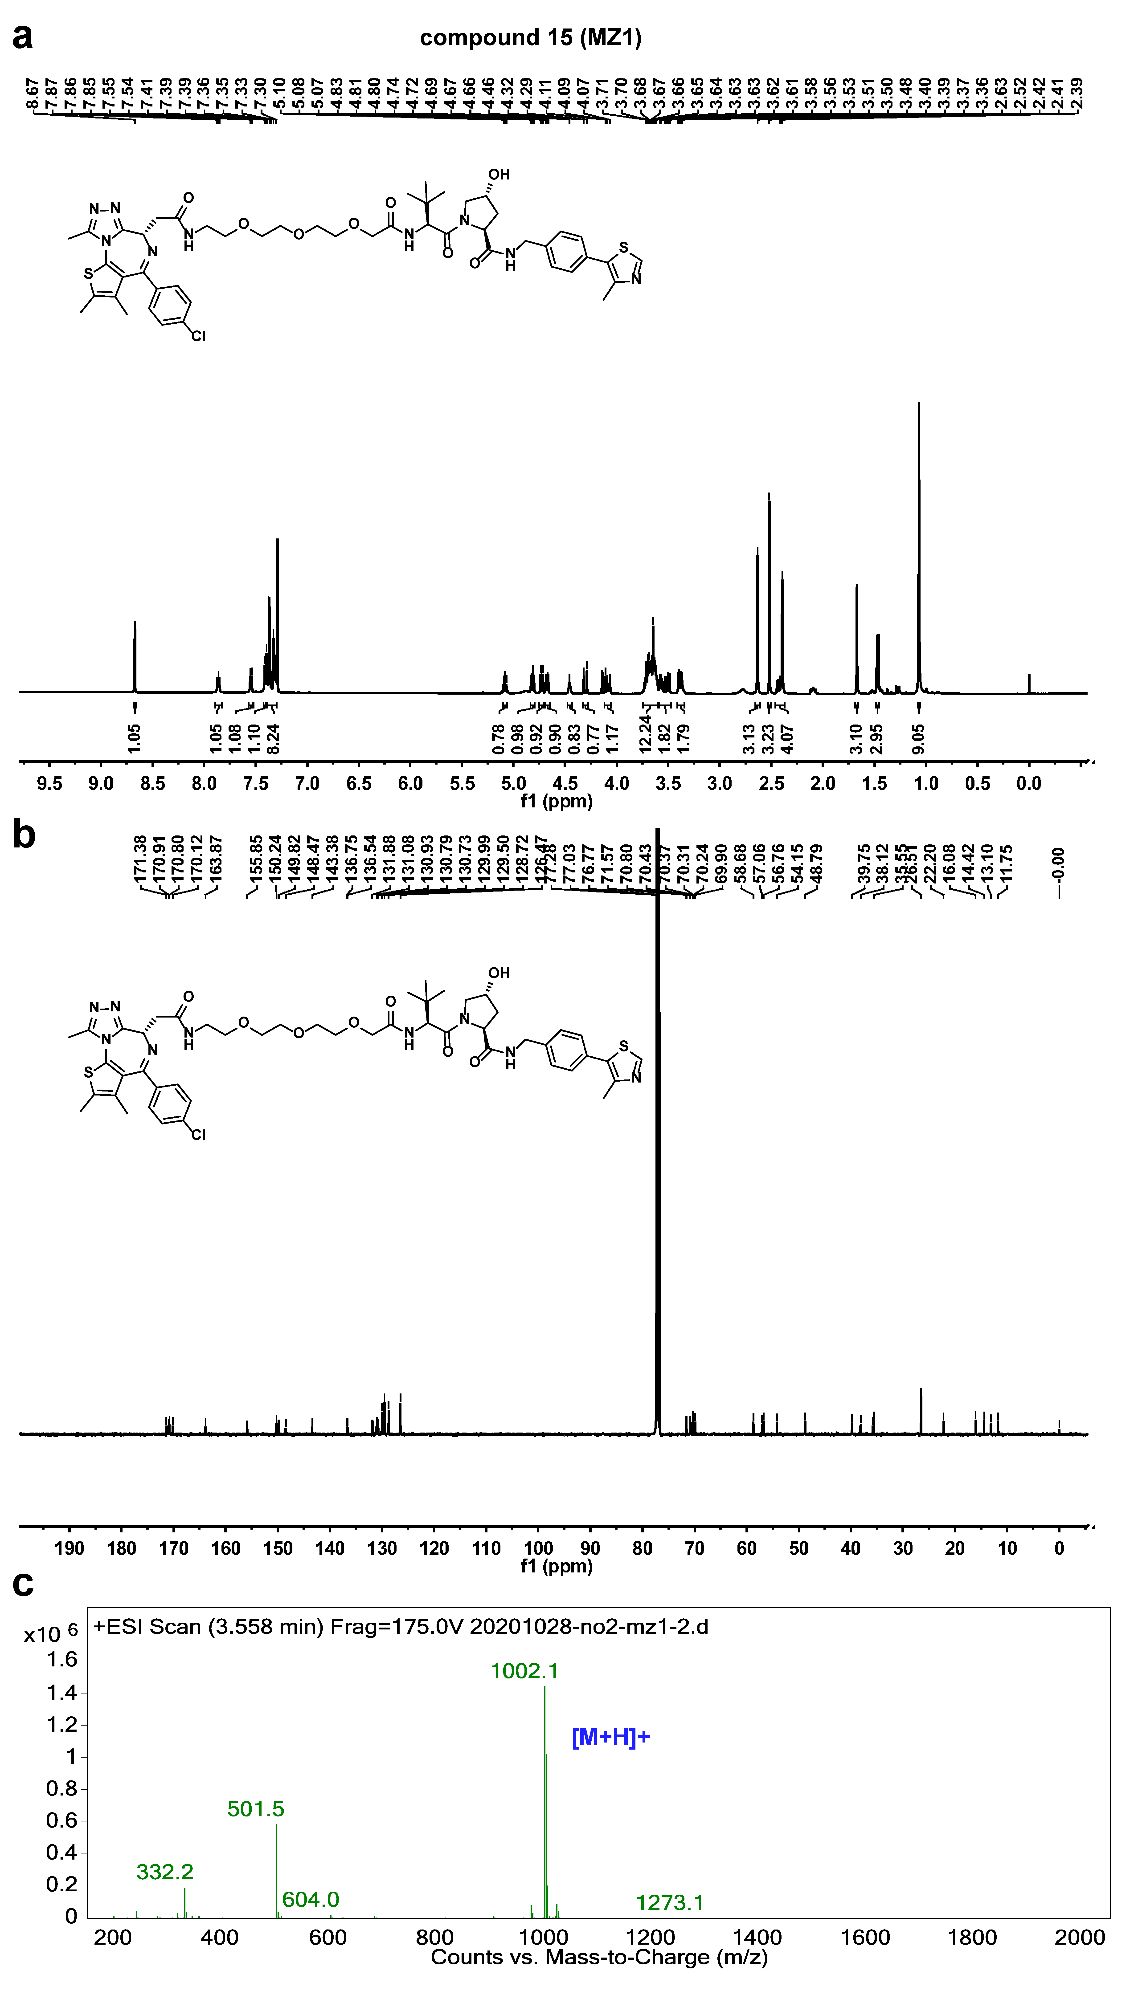
**

**Supplementary Figure 10. a,** 1H-NMR spectrum (CDCl3), **b,** 13C-NMR spectrum (CDCl3), and (**c**) mass spectrum of MZ1.

**
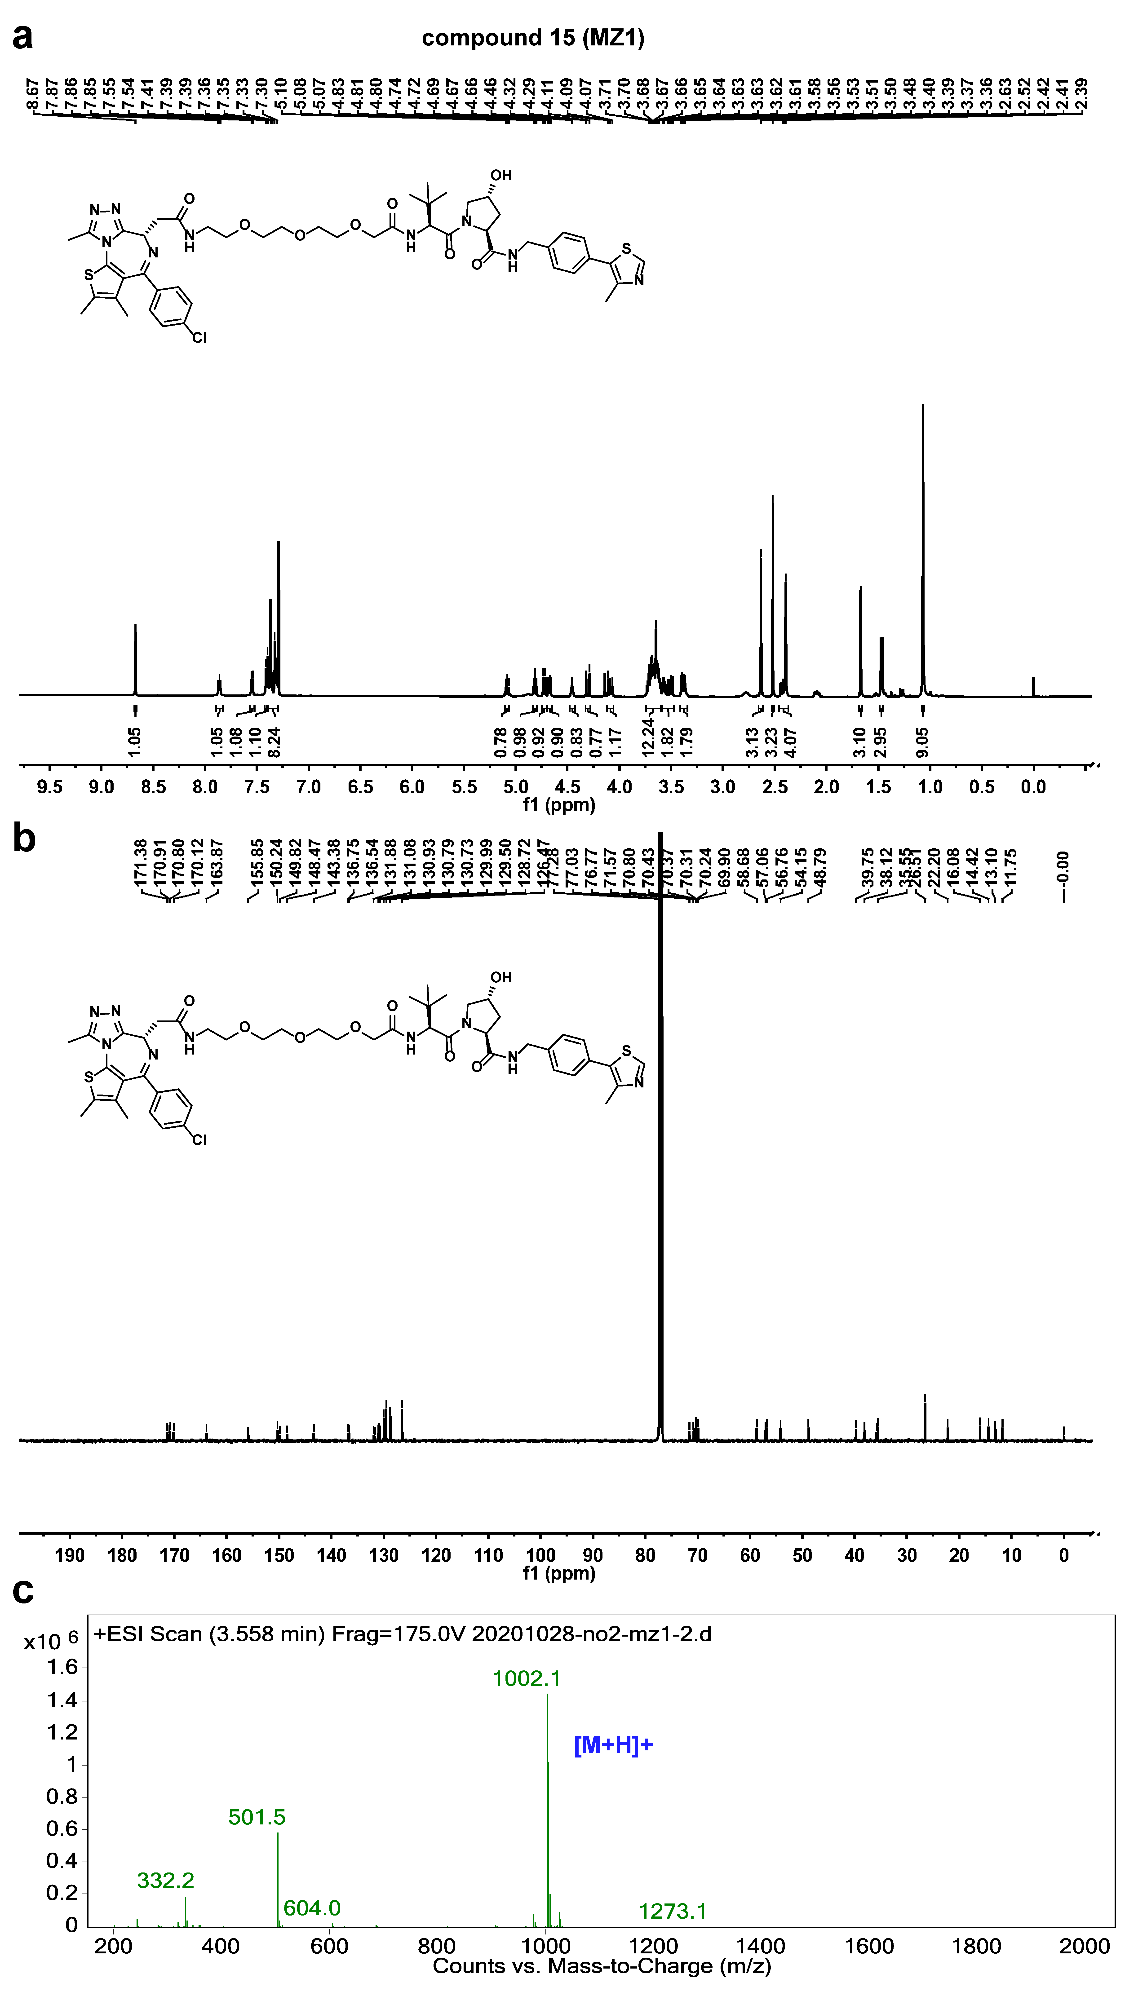
**

**Supplementary Figure 11. a,** 1H-NMR spectrum (CDCl3), **b,** 13C-NMR spectrum (CDCl3), and (**c**) mass spectrum of mMZ1.


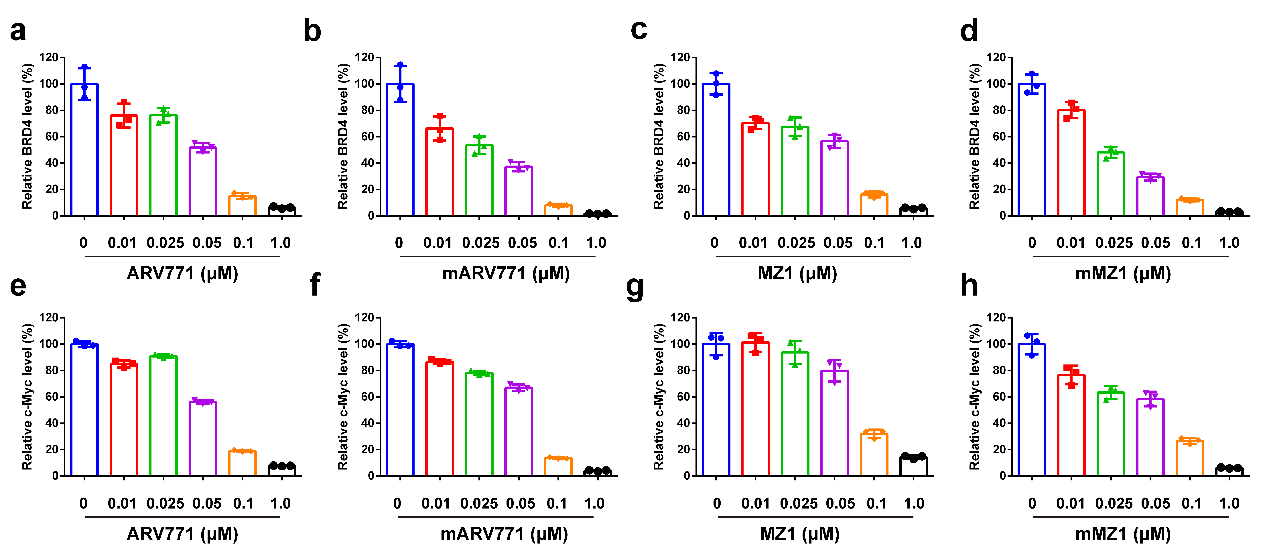


**Supplementary Figure 12. a-d,** Normalized BRD4 expression in MDA-MB-231 cells with the treatment of (**a**) ARV771, (**b**) mARV771, (**c**) MZ1 and (**d**) mMZ1. **e-h,** The normalized c-Myc level in MDA-MB-231 cell with the treatment of (**e**) ARV771, (**f**) mARV771, (**g**) MZ1, and (**h**) mMZ1 for 24 h.


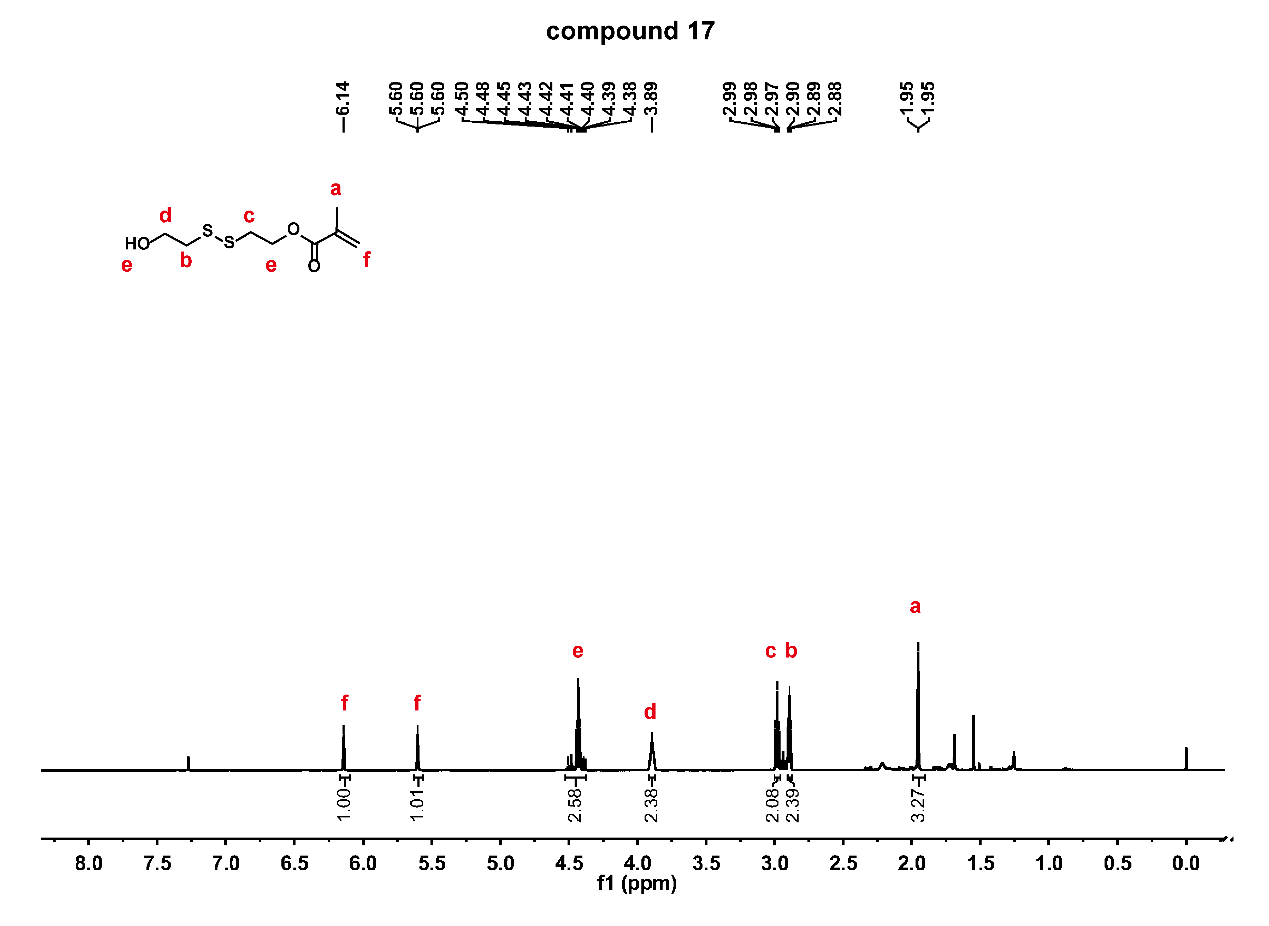


**Supplementary Figure 13.** 1H-NMR spectrum of compound 17 (CDCl3).


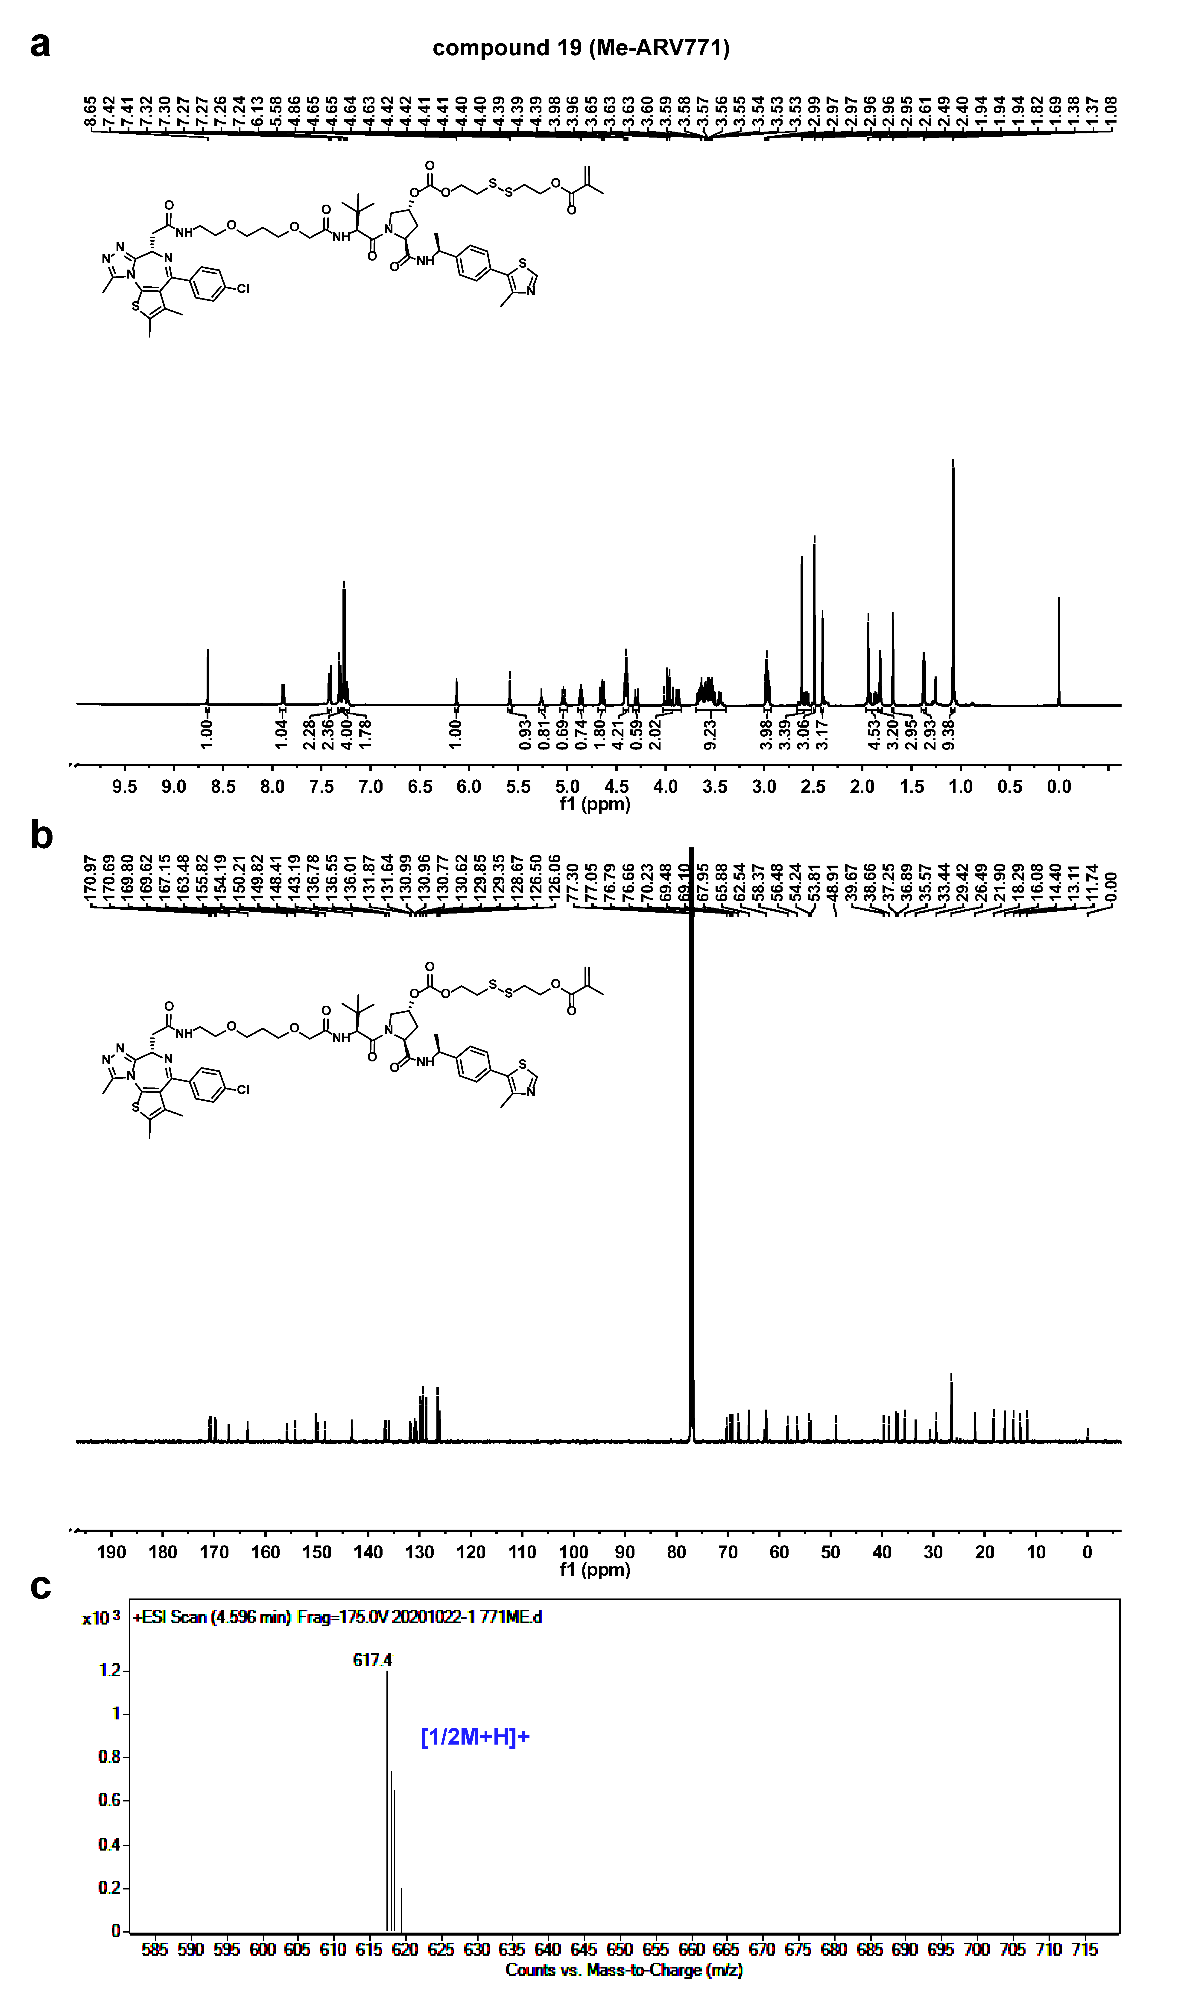


**Supplementary Figure 14. a,** 1H-NMR spectrum (CDCl3), **b,** 13C-NMR spectrum (CDCl3), and (**c**) mass spectrum of Me-ARV771.


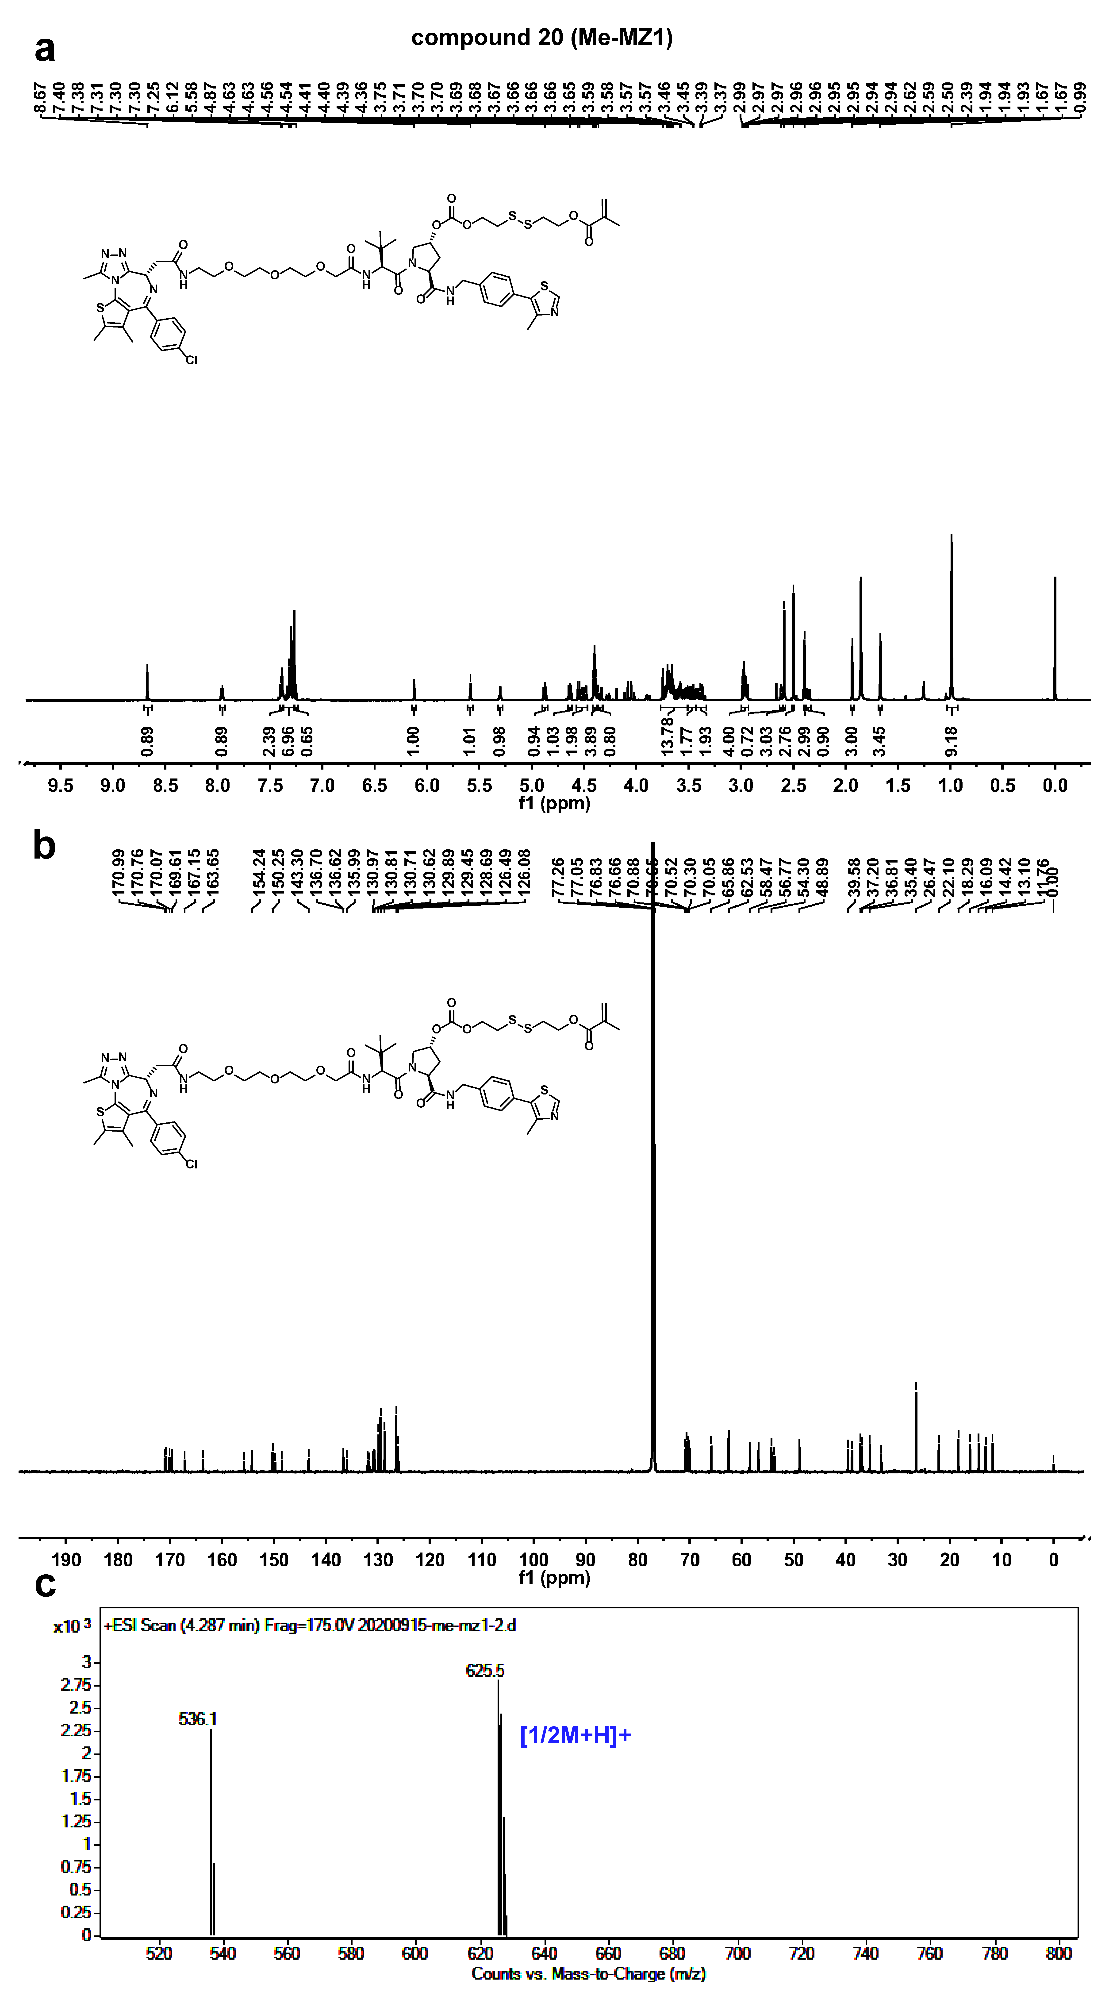


**Supplementary Figure 15. a,** 1H-NMR spectrum (CDCl3), **b,** 13C-NMR spectrum (CDCl3), and (**c**) mass spectrum of Me-MZ1.

**
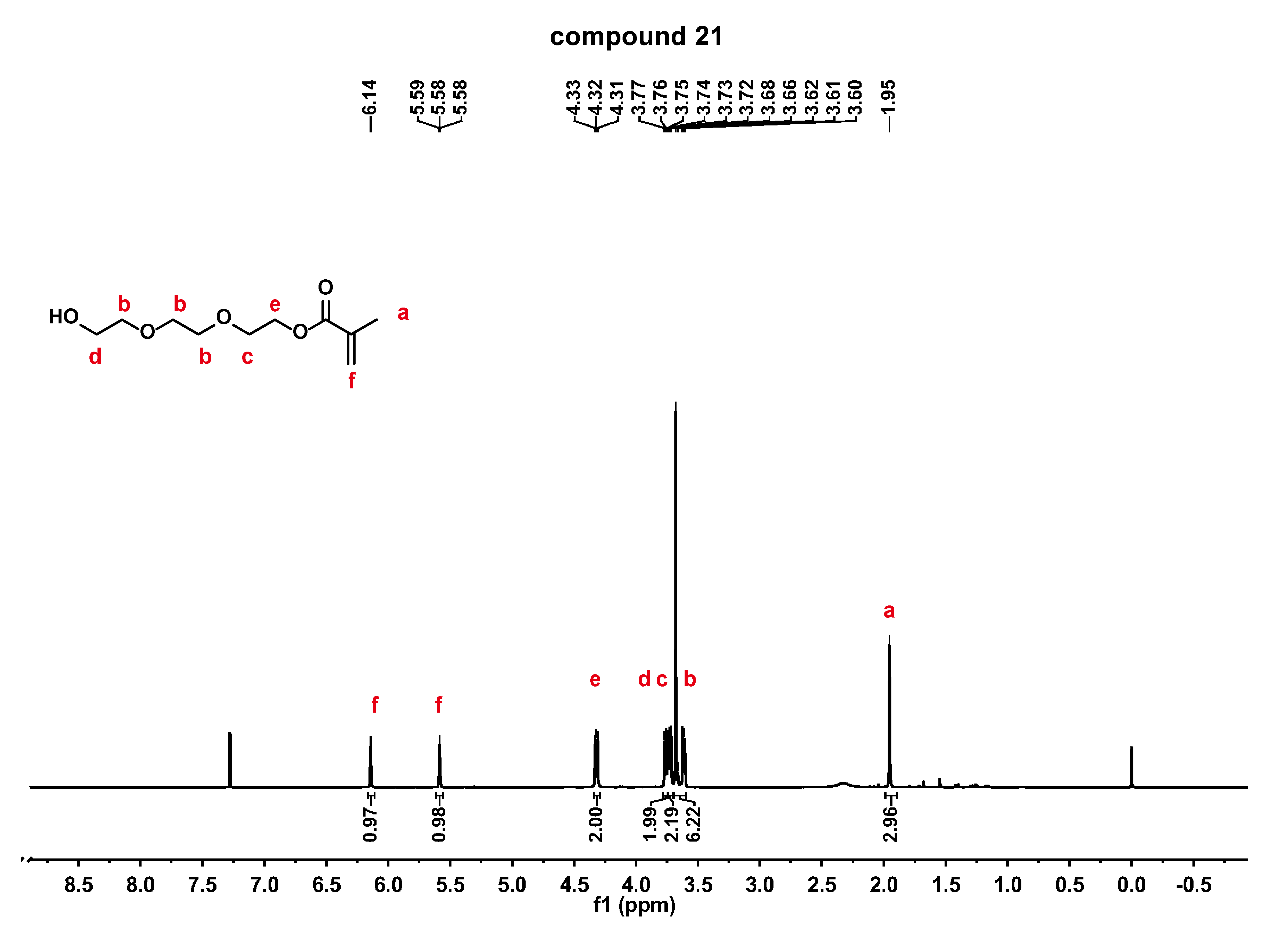
**

**Supplementary Figure 16.** 1H-NMR spectrum of compound 21 (CDCl3).

**
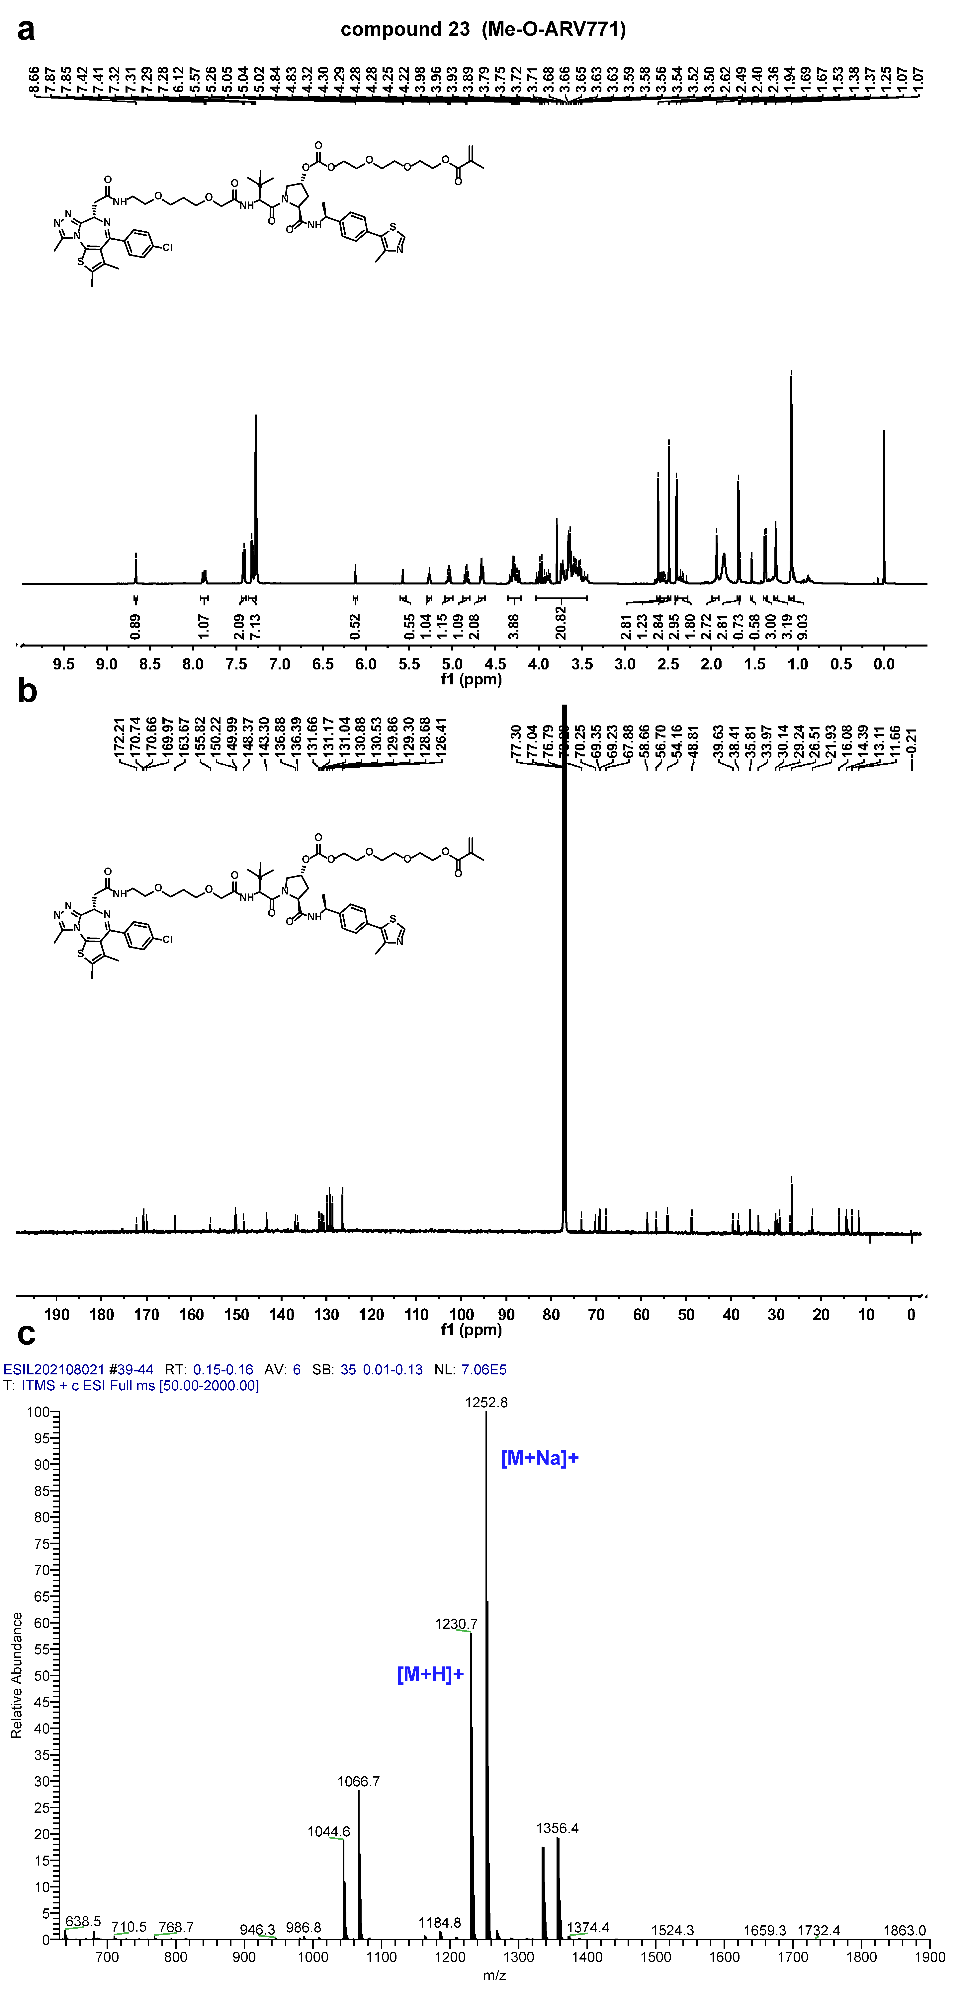
**

**Supplementary Figure 17. a**, 1H-NMR spectrum (CDCl3), **b**, 13C-NMR spectrum (CDCl3), and (**c**) mass spectrum of Me-O-ARV771.


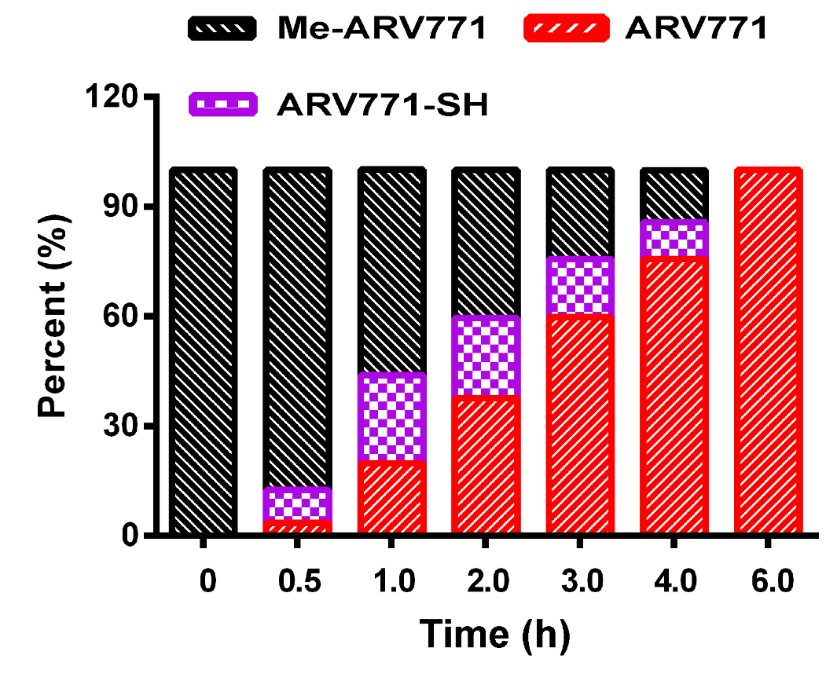


**Supplementary Figure 18.** DTT-mediated reduction of ARV771 methacrylate.


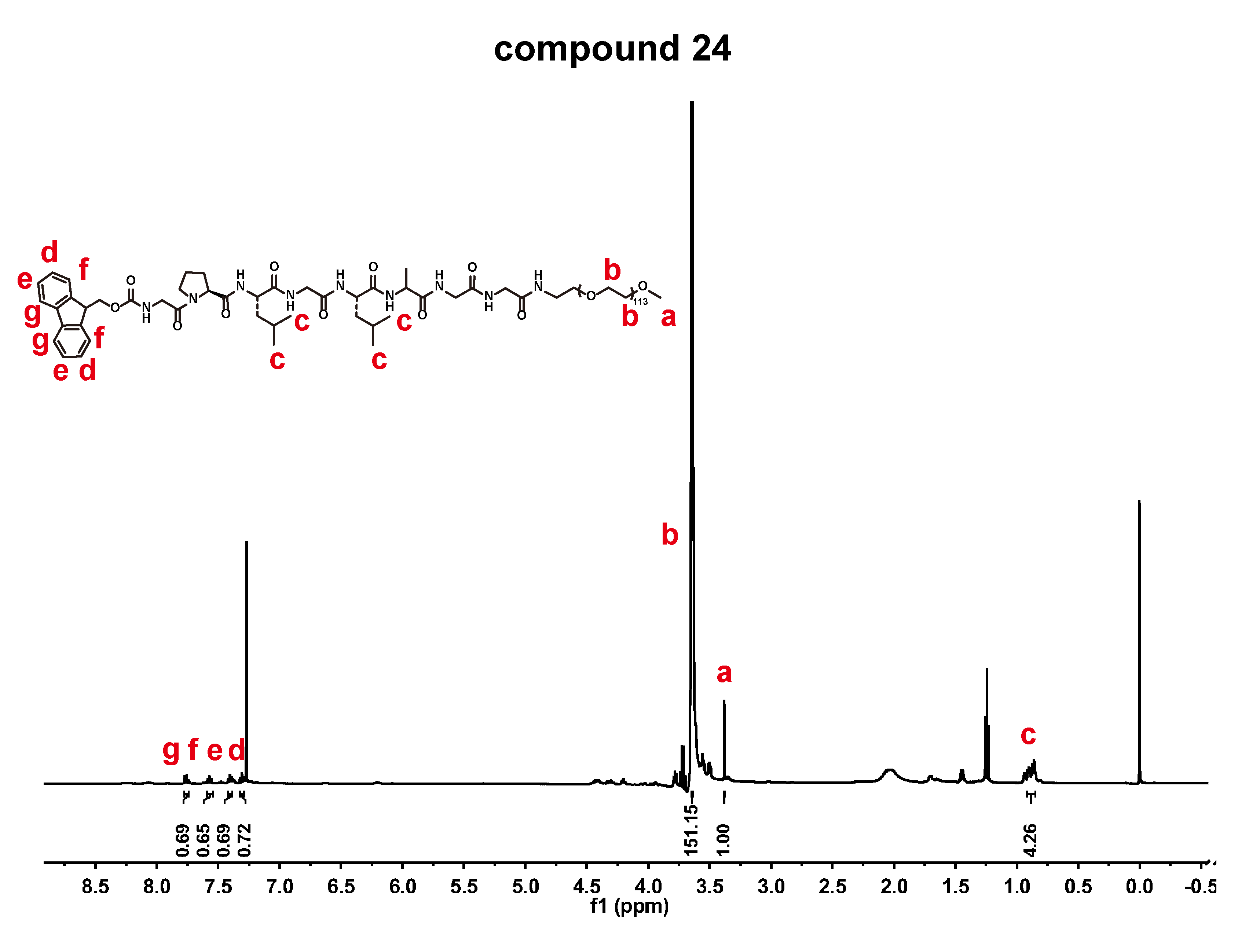


**Supplementary Figure 19.** 1H-NMR spectrum of compound 24 (CDCl3).


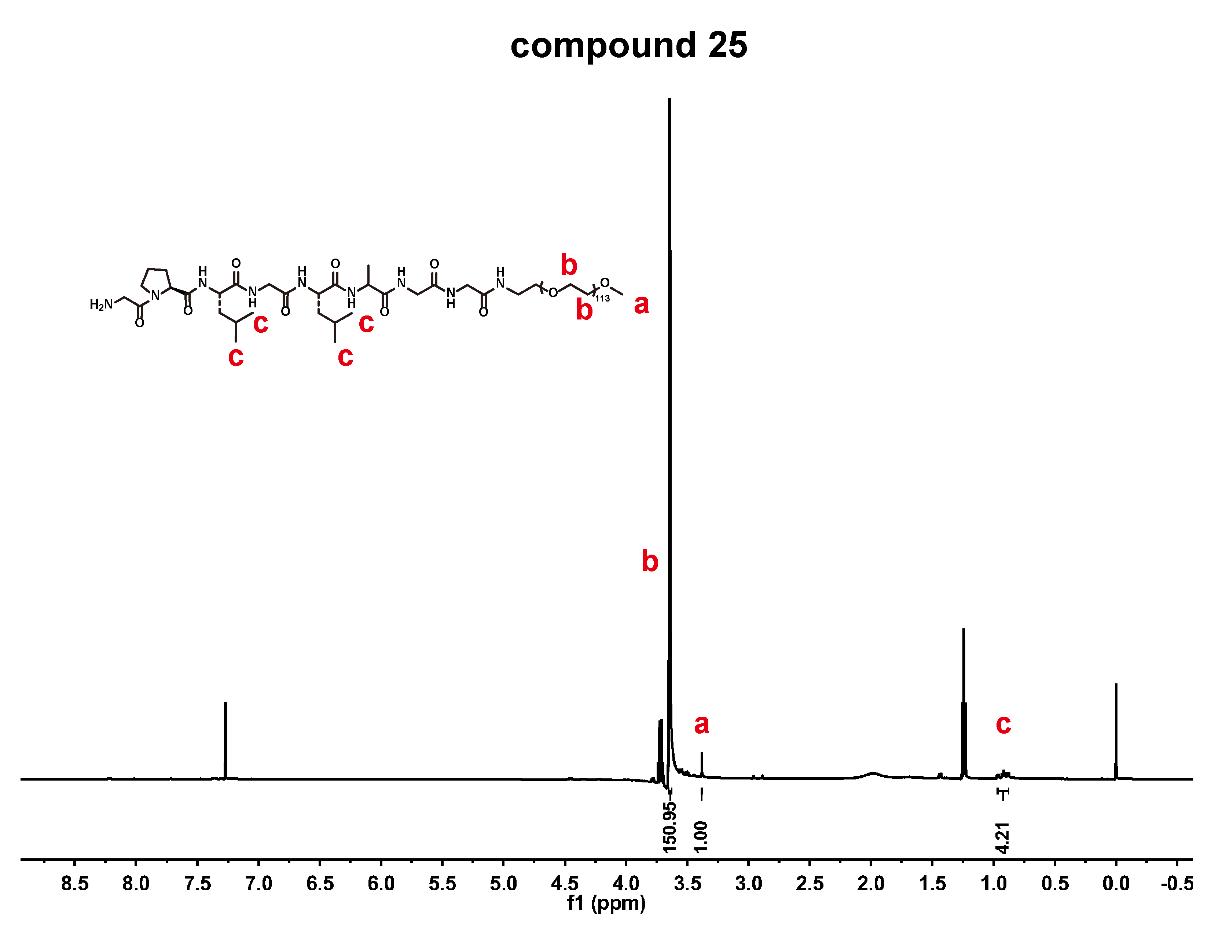


**Supplementary Figure 20.** 1H-NMR spectrum of compound 25 (CDCl3).


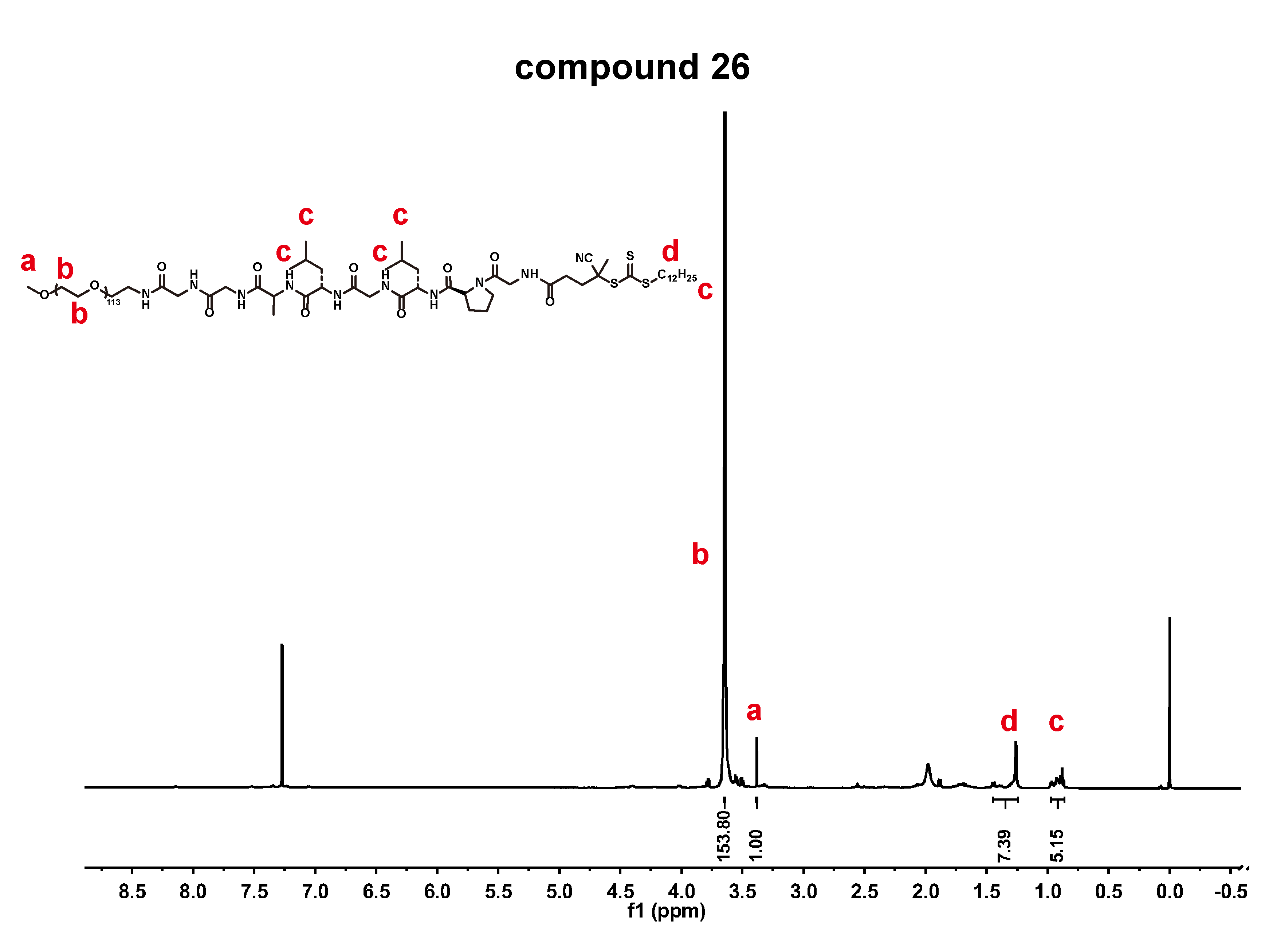


**Supplementary Figure 21.** 1H-NMR spectrum of compound 26 (CDCl3).


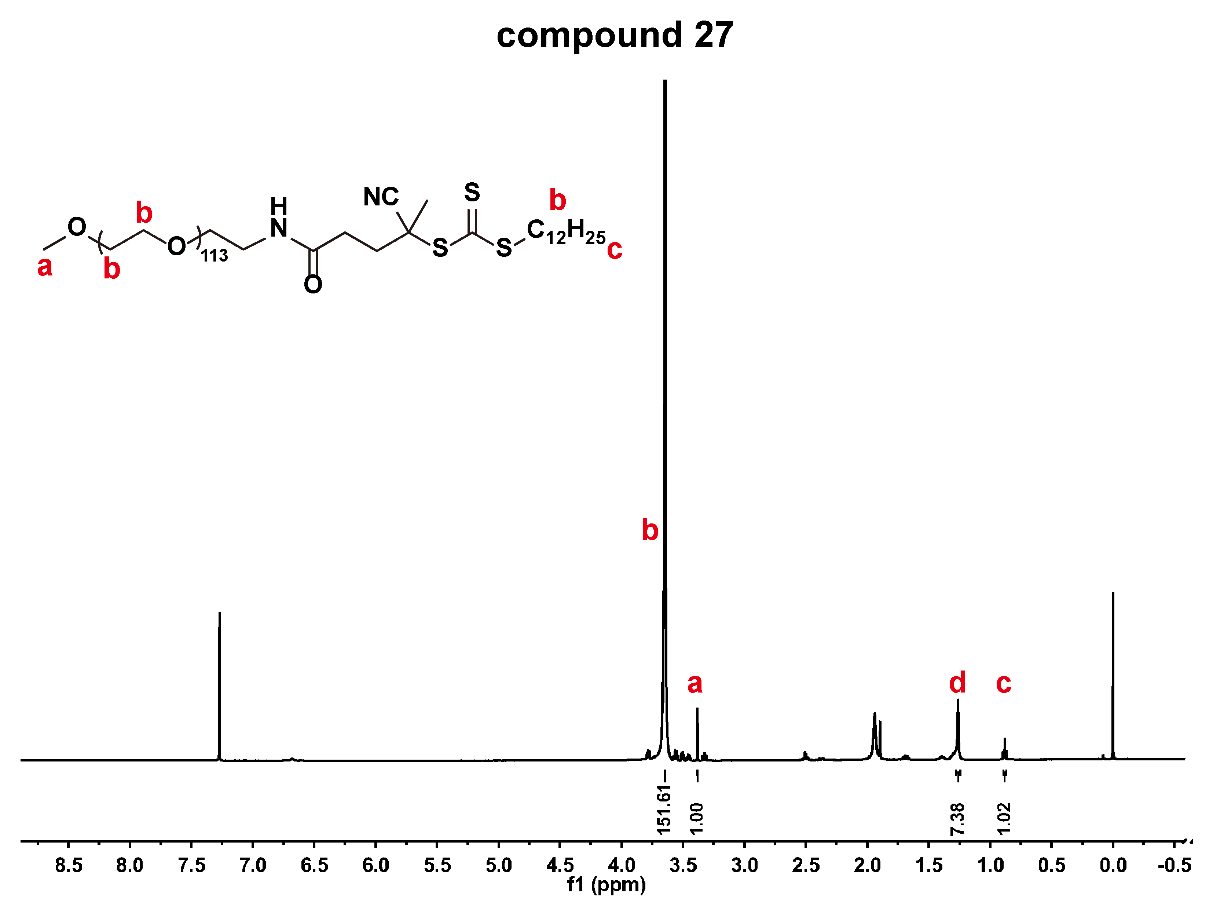


**Supplementary Figure 22.** 1H-NMR spectrum of compound 27 (CDCl3).


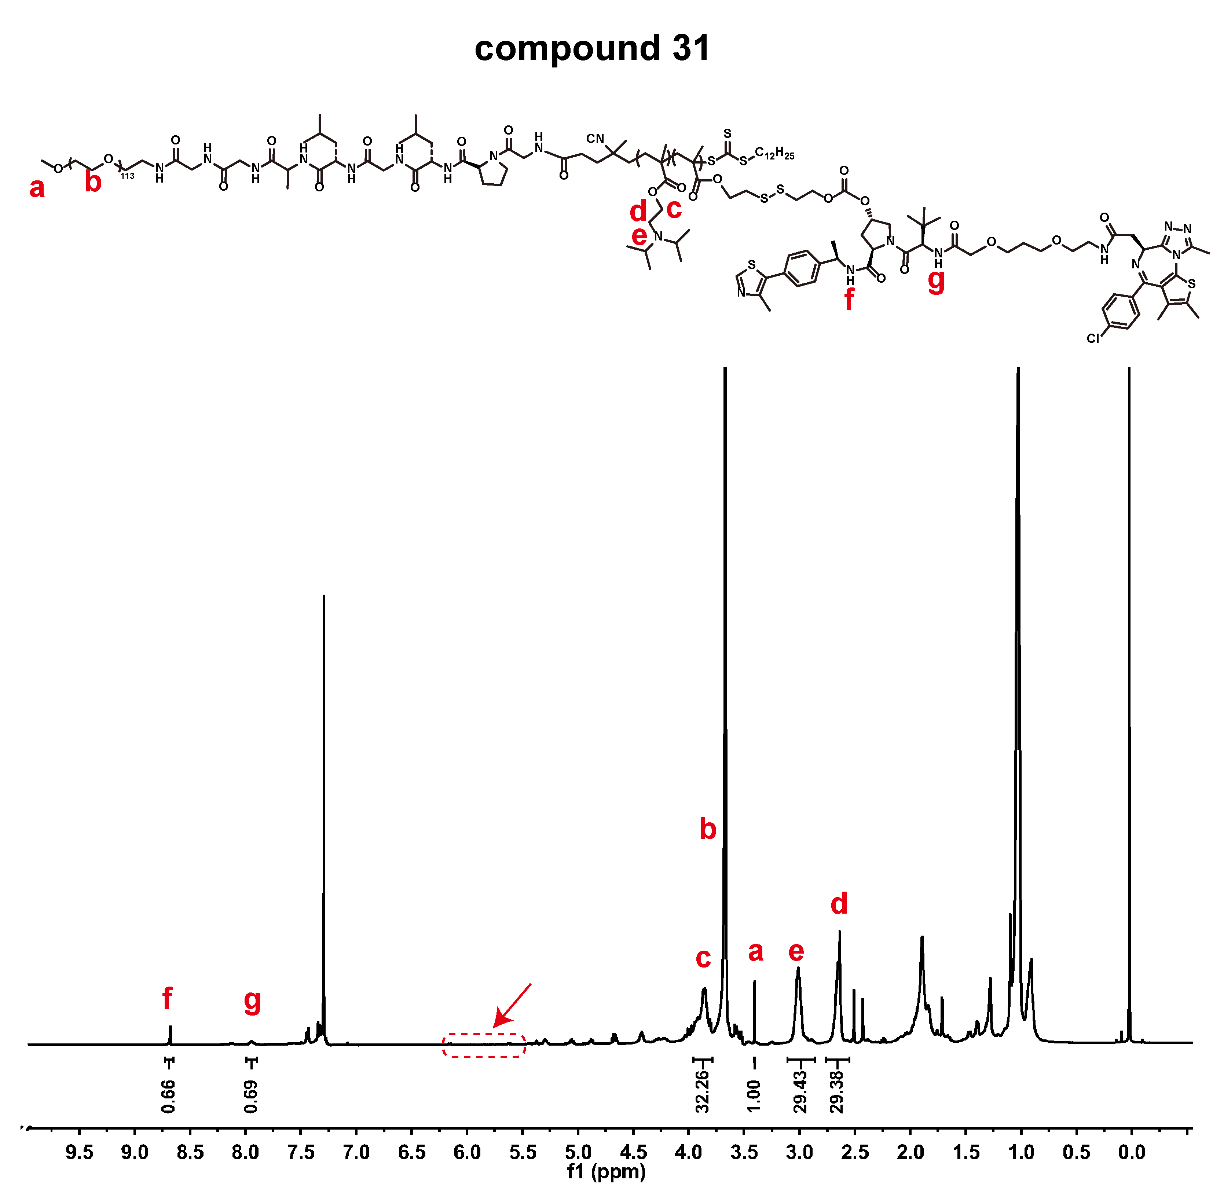


**Supplementary Figure 23.** 1H-NMR spectrum of compound 31 (CDCl3).


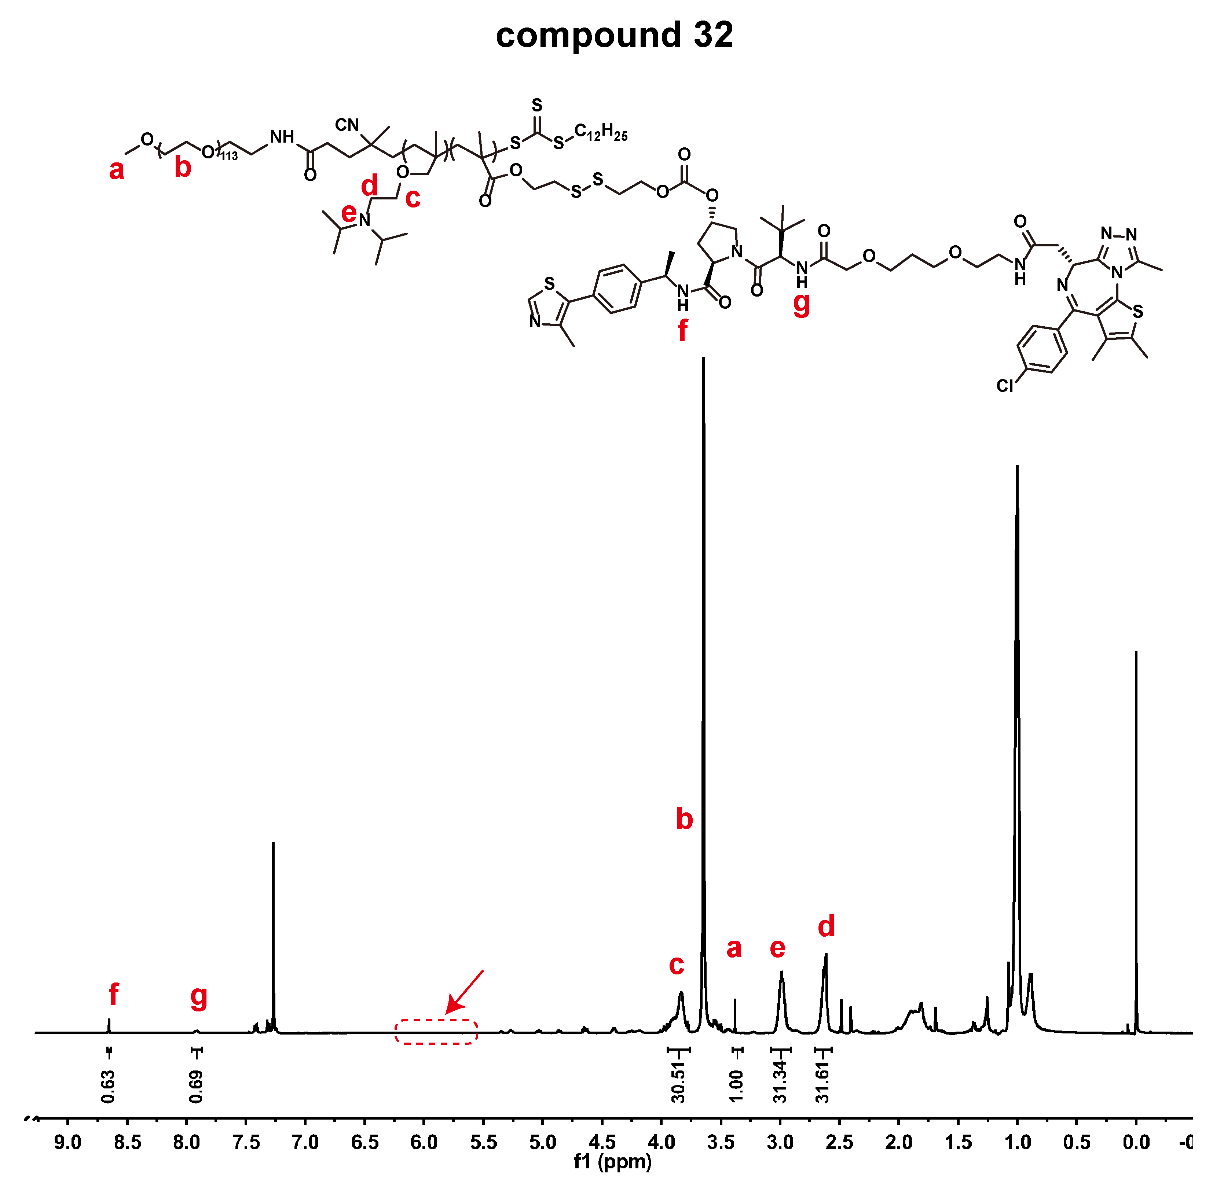


**Supplementary Figure 24.** 1H-NMR spectrum of compound 32 (CDCl3).


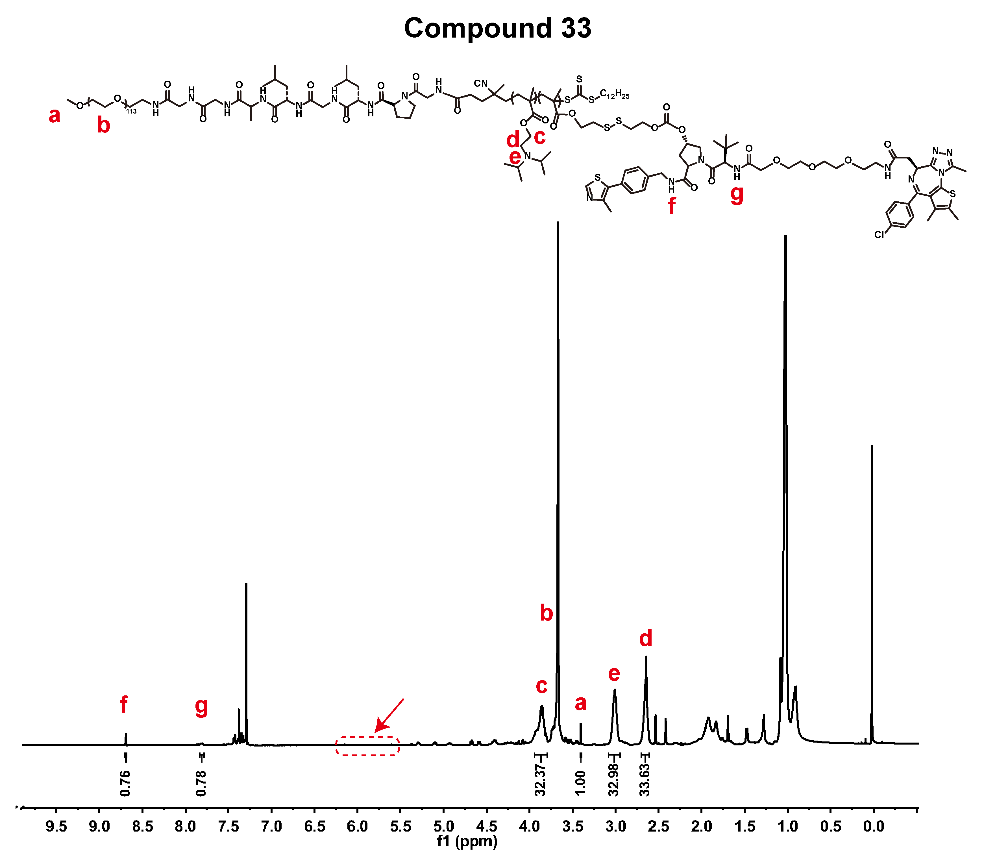


**Supplementary Figure 25.** 1H-NMR spectrum of compound 33 (CDCl3).


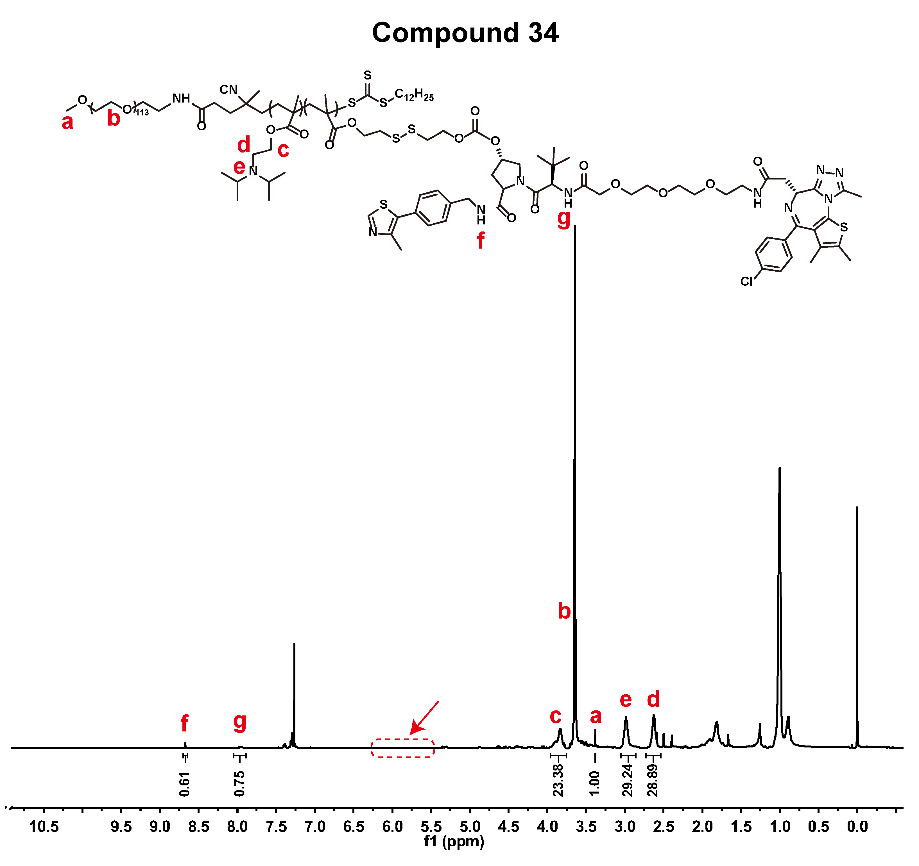


**Supplementary Figure 26.** 1H-NMR spectrum of compound 34 (CDCl3).


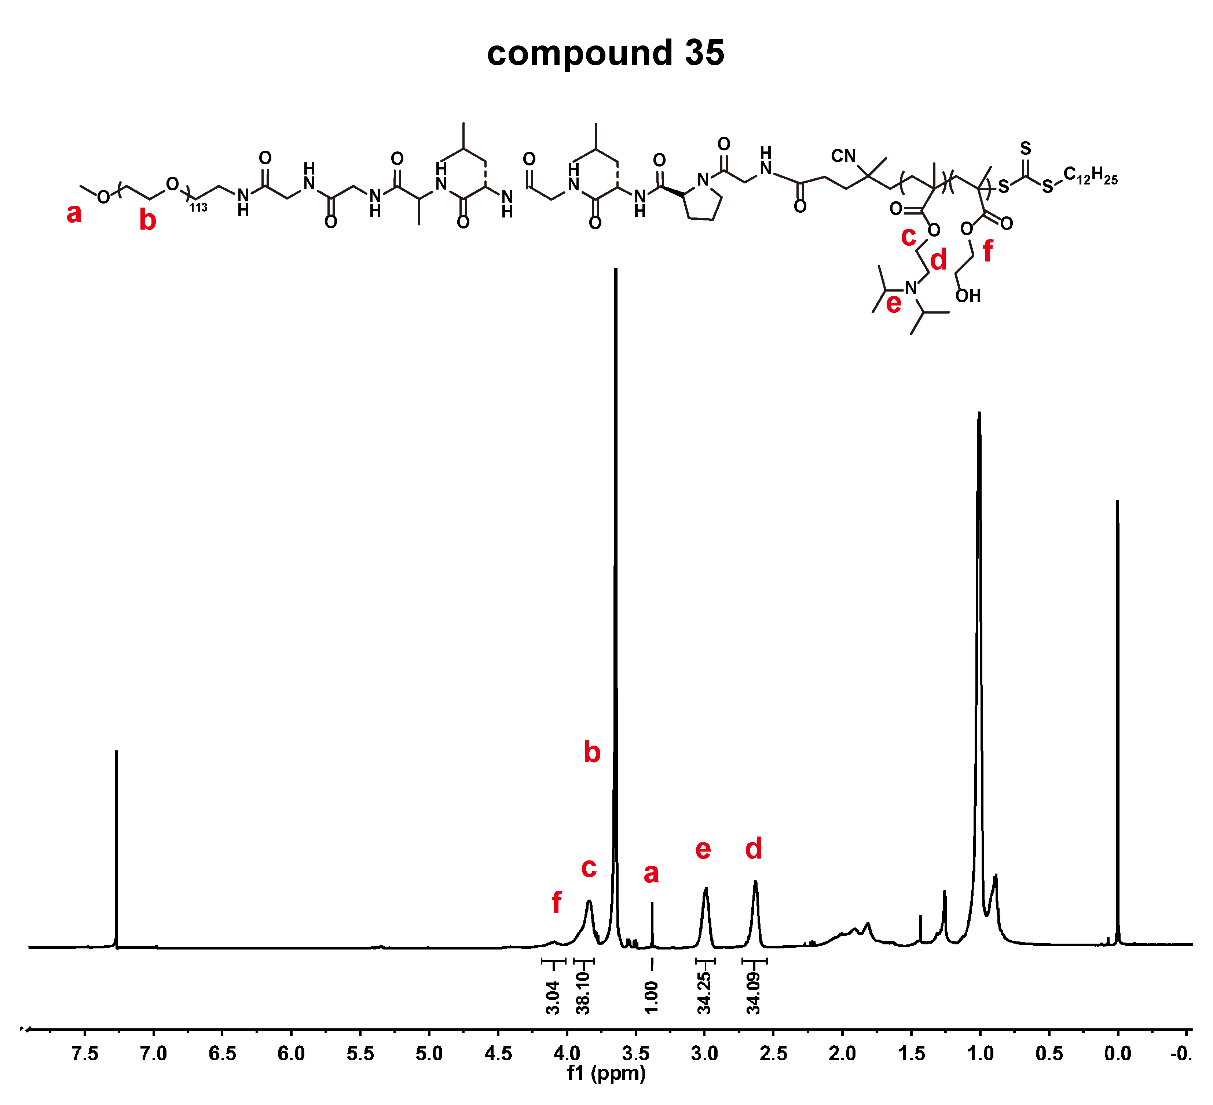


**Supplementary Figure 27.** The 1H-NMR spectrum of compound 35 (CDCl3).


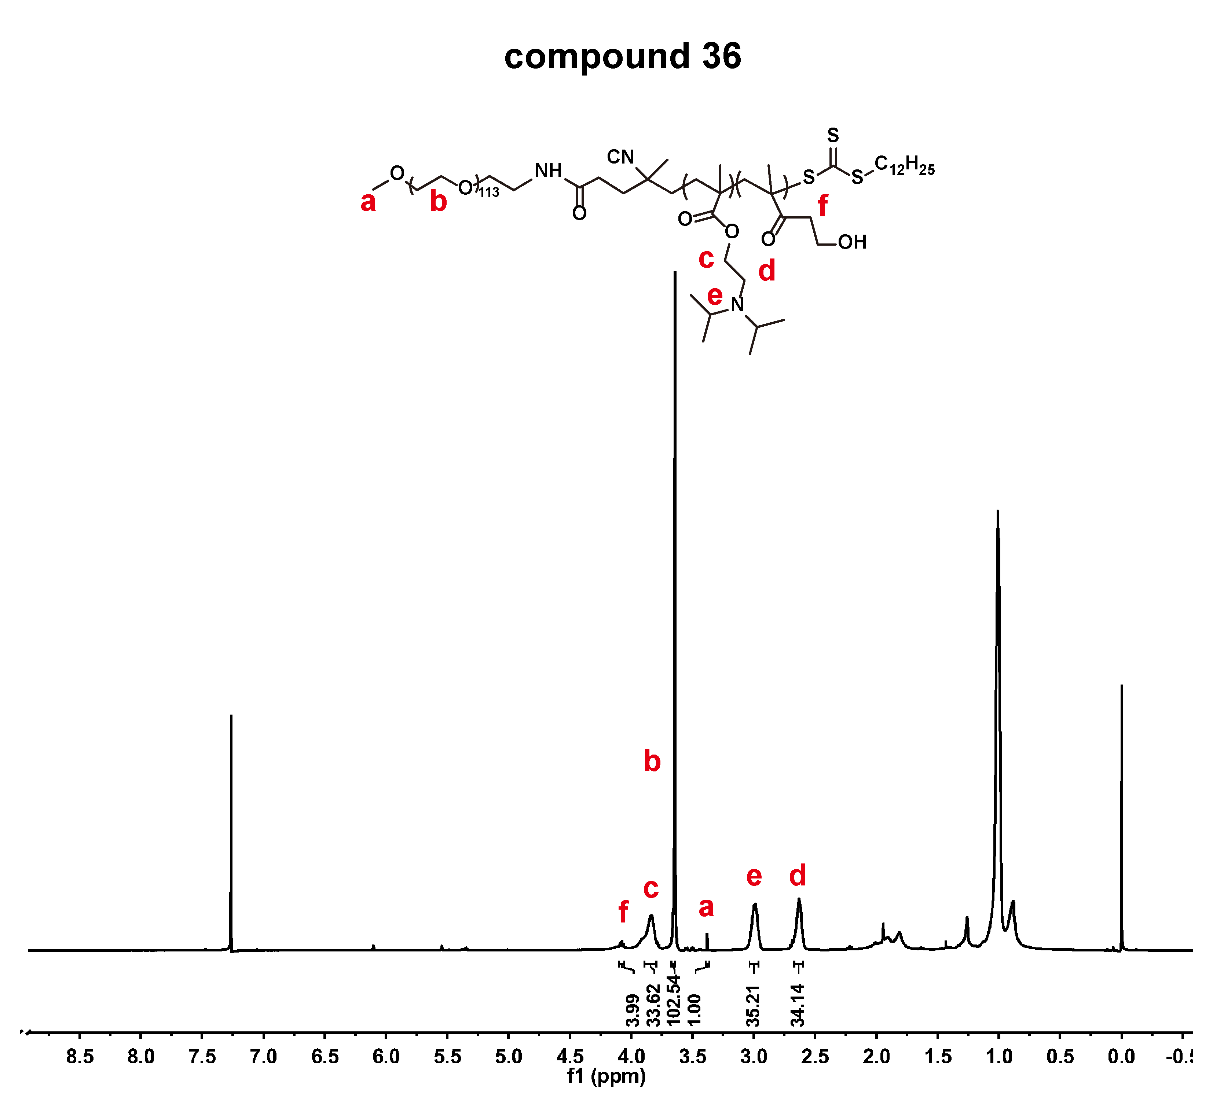


**Supplementary Figure 28.** 1H-NMR spectrum of compound 36 (CDCl3).


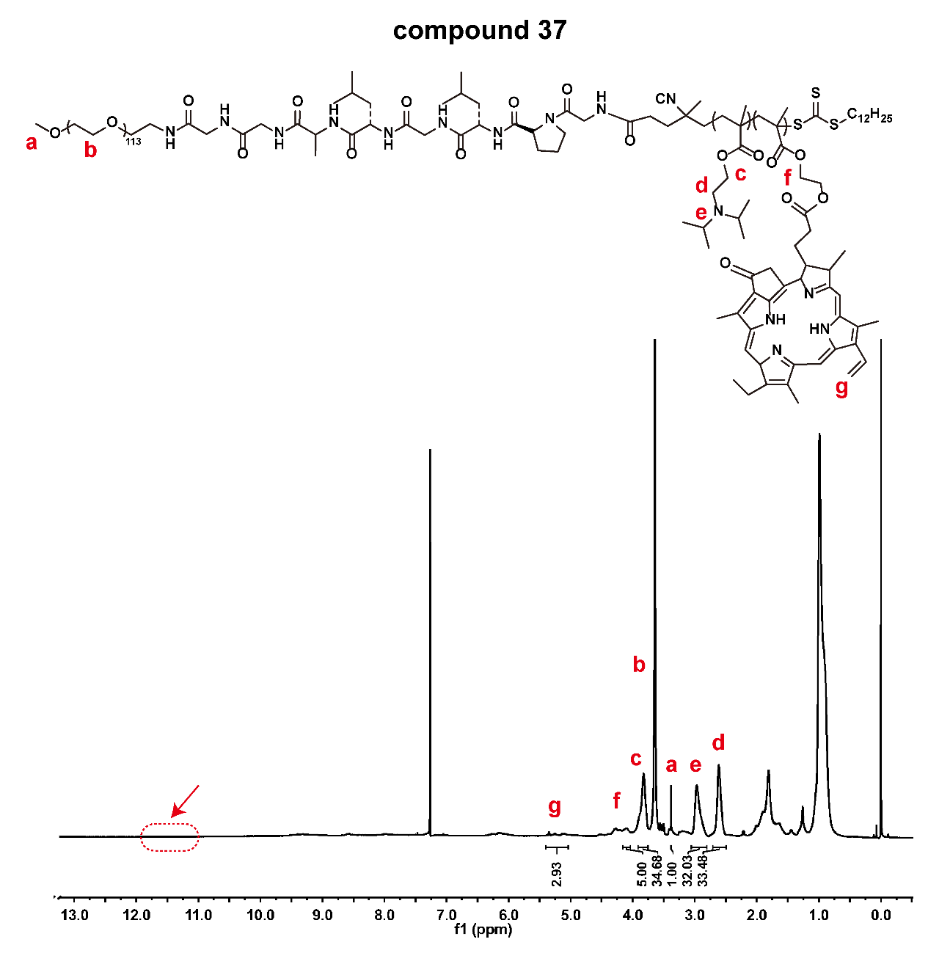


**Supplementary Figure 29.** 1H-NMR spectrum of compound 37 (CDCl3).


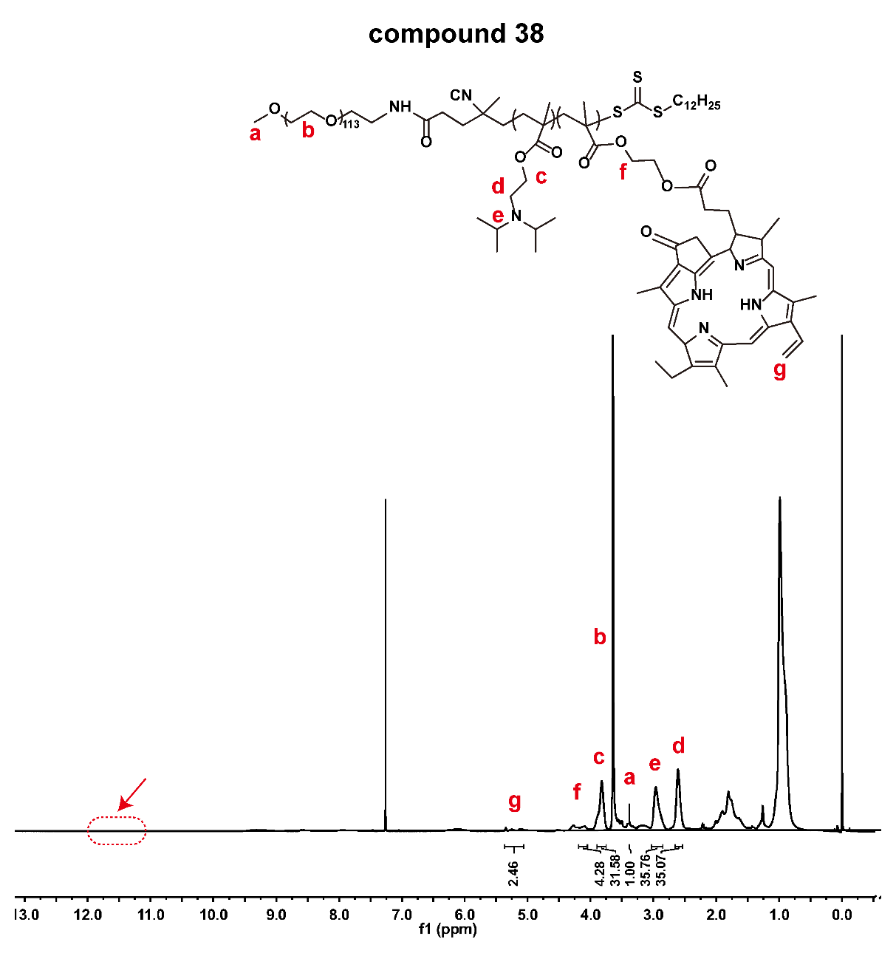


**Supplementary Figure 30.** 1H-NMR spectrum of compound 38 (CDCl3).


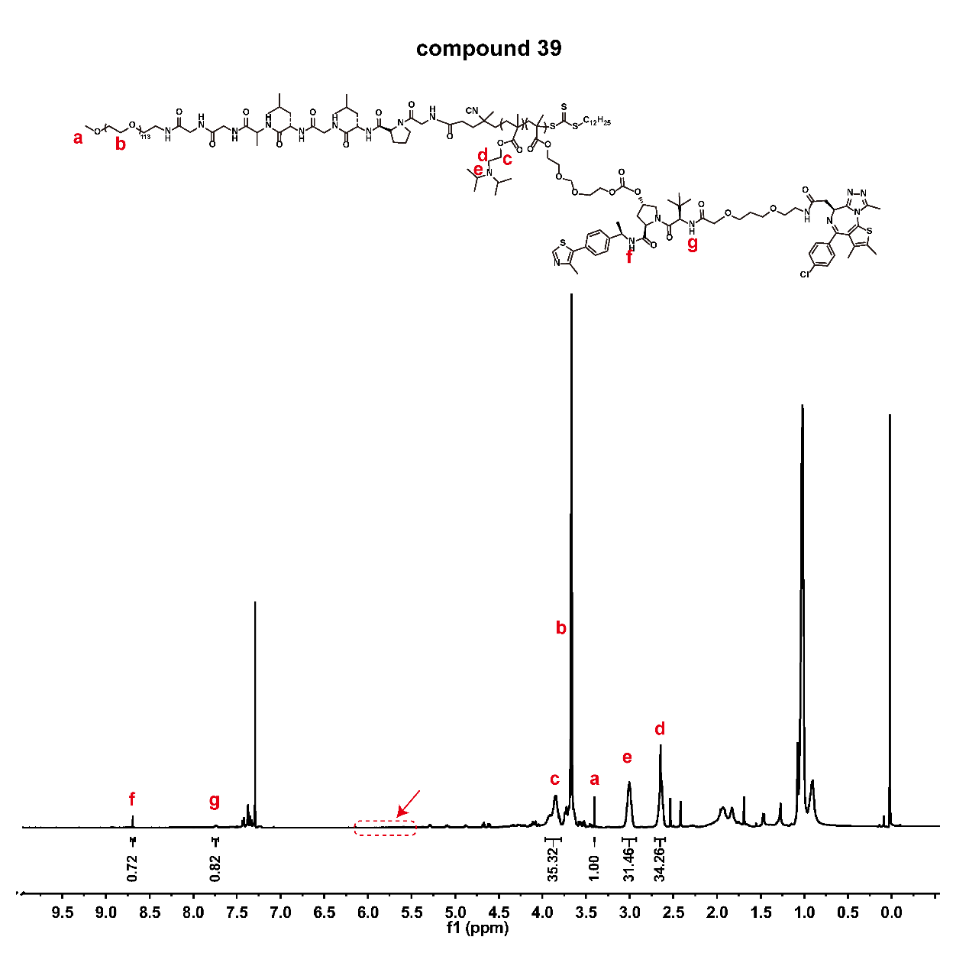


**Supplementary Figure 31.** 1H-NMR spectrum of compound 39 (CDCl3).


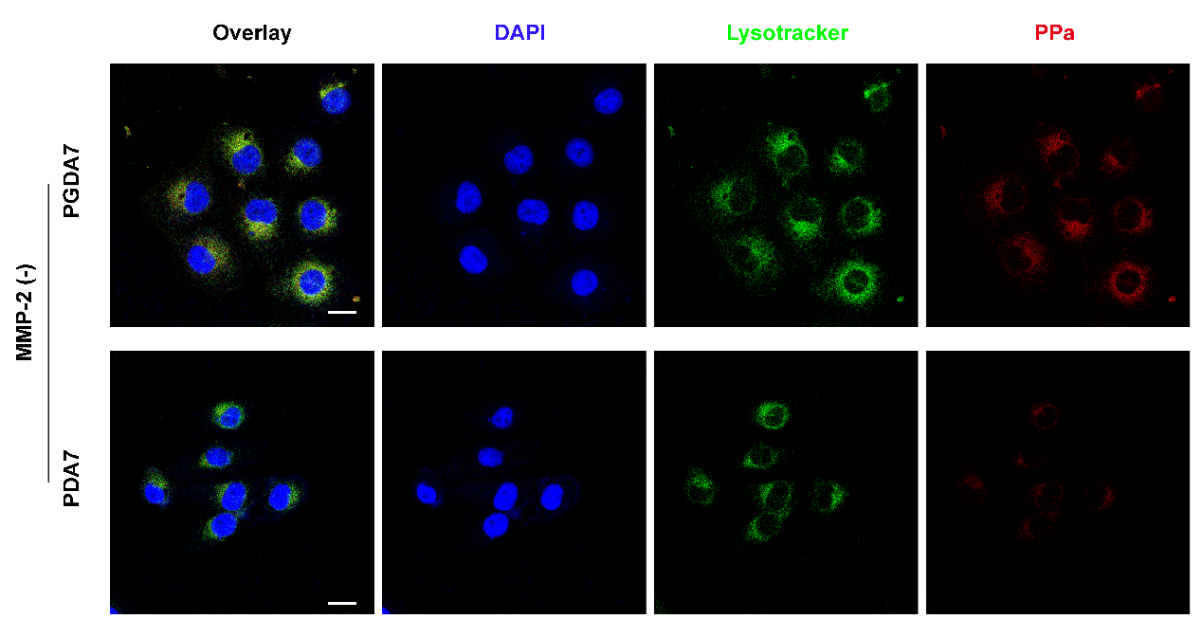


**Supplementary Figure 32.** CLSM images of MDA-MB-231 cells incubated with PGDA7 and PDA7 POLYTAC nanoparticles for 12 h (scale bar = 20 μm).


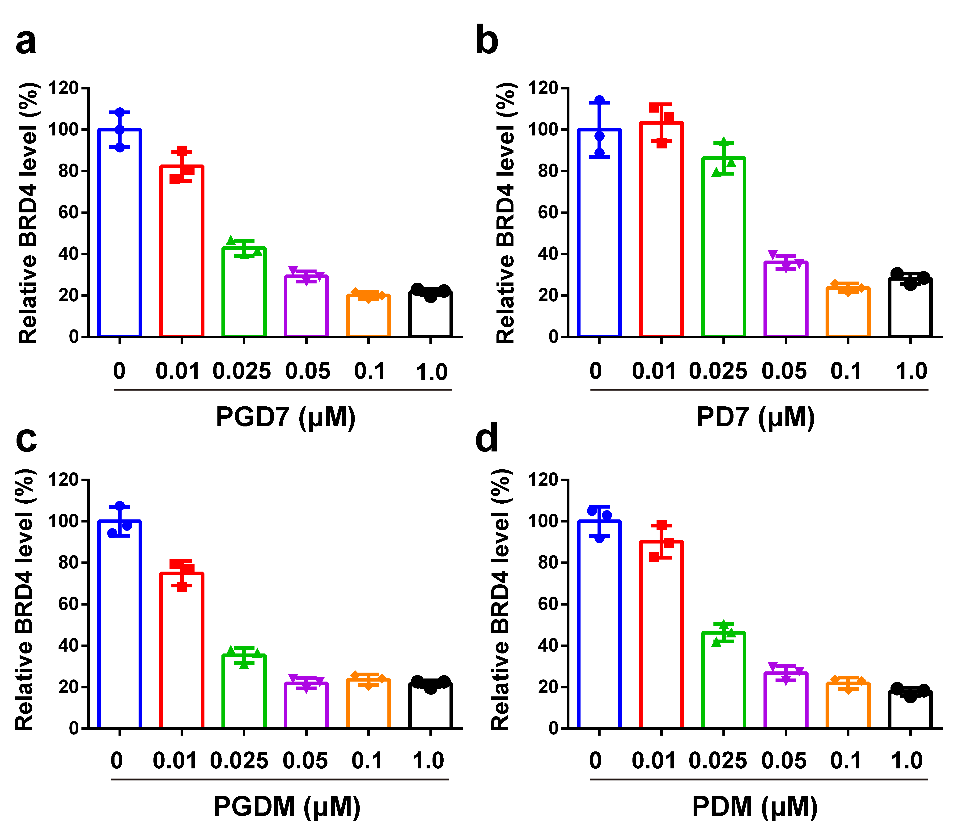


**Supplementary Figure 33.** Normalized BRD4 expression in MDA-MB-231 cells with the treatment of (**a**) PGD7, (**b**) PD7, (**c**) PGDM, or (**d**) PDM nanoparticles for 24 h as a function of ARV771 concentration.


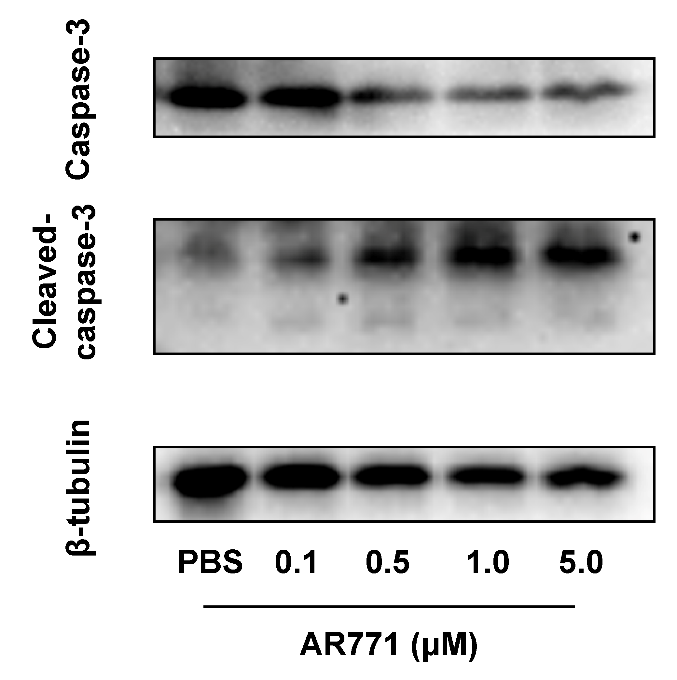


**Supplementary Figure 34.** ARV771-induced caspase-3 activation in MDA-MB-231 cells *in vitro*. The cells were treated with ARV771 for 24 h and then examined by western blot assay.


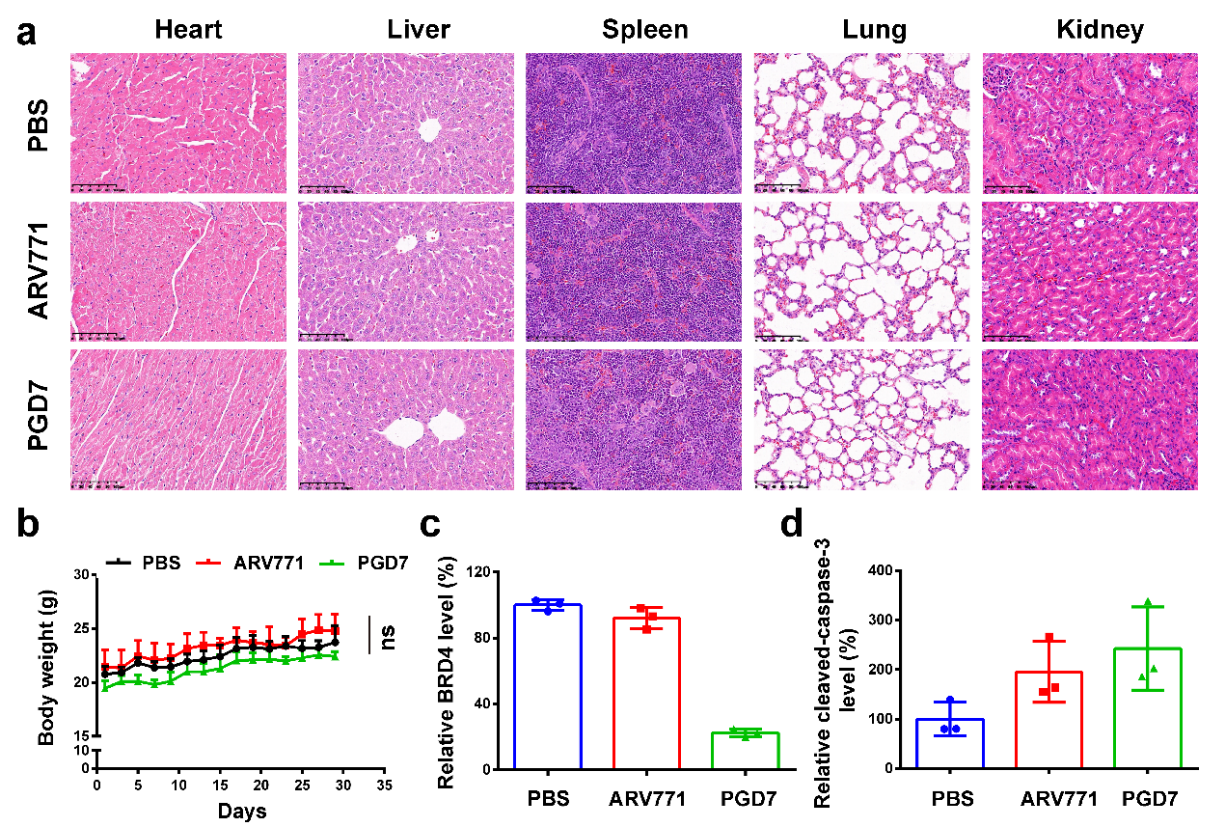


**Supplementary Figure 35. a,** H&E staining of the major organs at the end of anti-tumor study (heart, liver, spleen, lung, kidney); **b,** Body weight change of the tumor-bearing Balb/c nude mice during the experimental period; **c,** Normalized BRD4 level in MDA-MB-231 tumor examined at the end of the anti-tumor study *in vivo*; **d,** Normalized cleaved-caspase-3 level in MDA-MB-231 tumor examined at the end of the anti-tumor study *in vivo*.


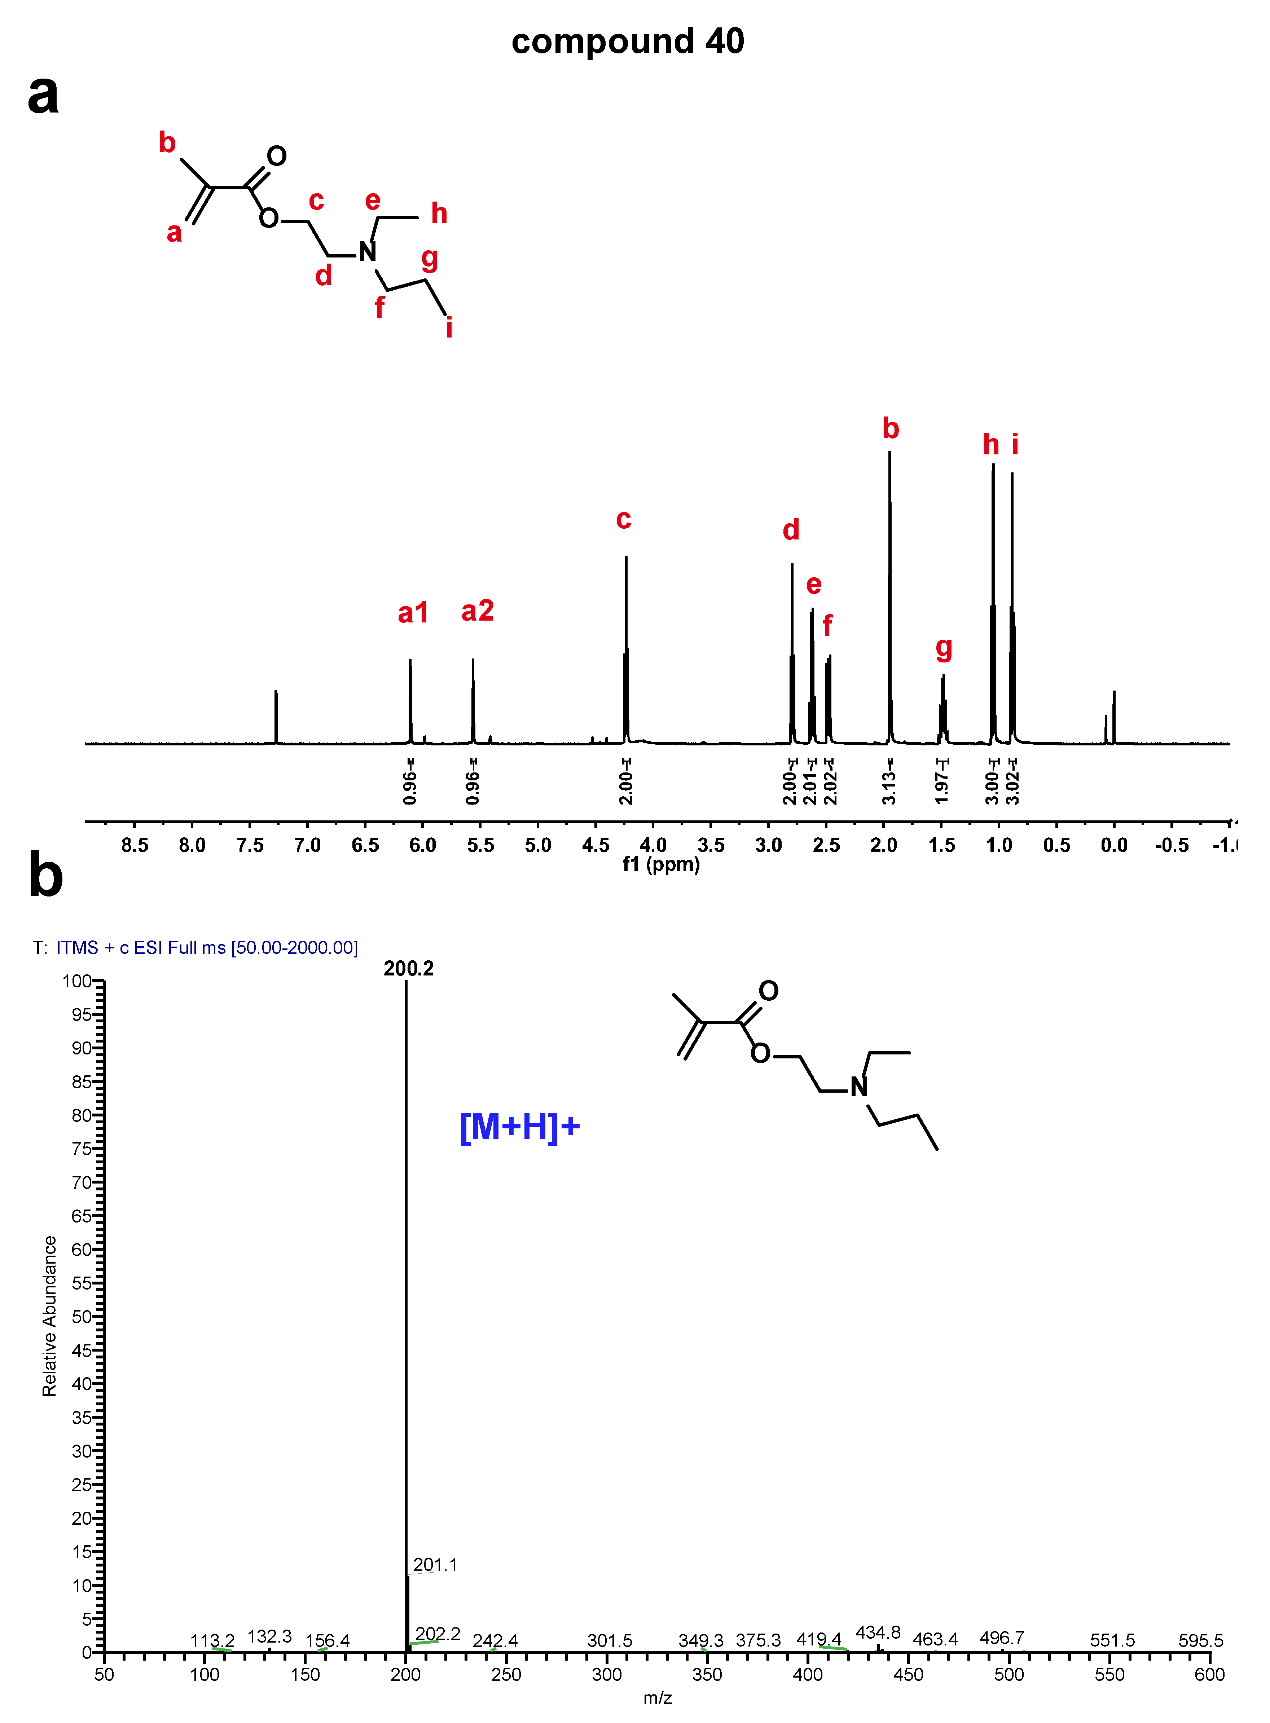


**Supplementary Figure 36.** **a,** 1H-NMR spectrum (CDCl3), and (**b**) mass spectrum of compound 40.


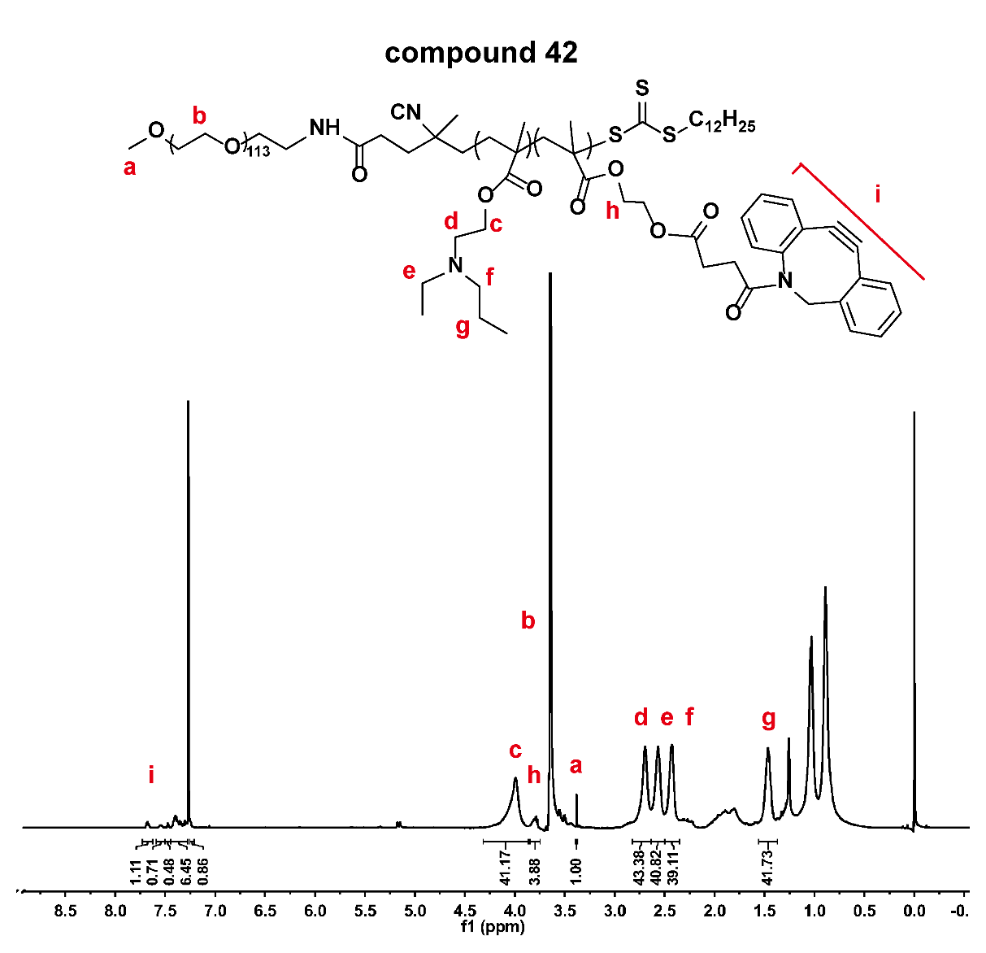


**Supplementary Figure 37.** 1H-NMR spectrum of compound 42 (CDCl3).


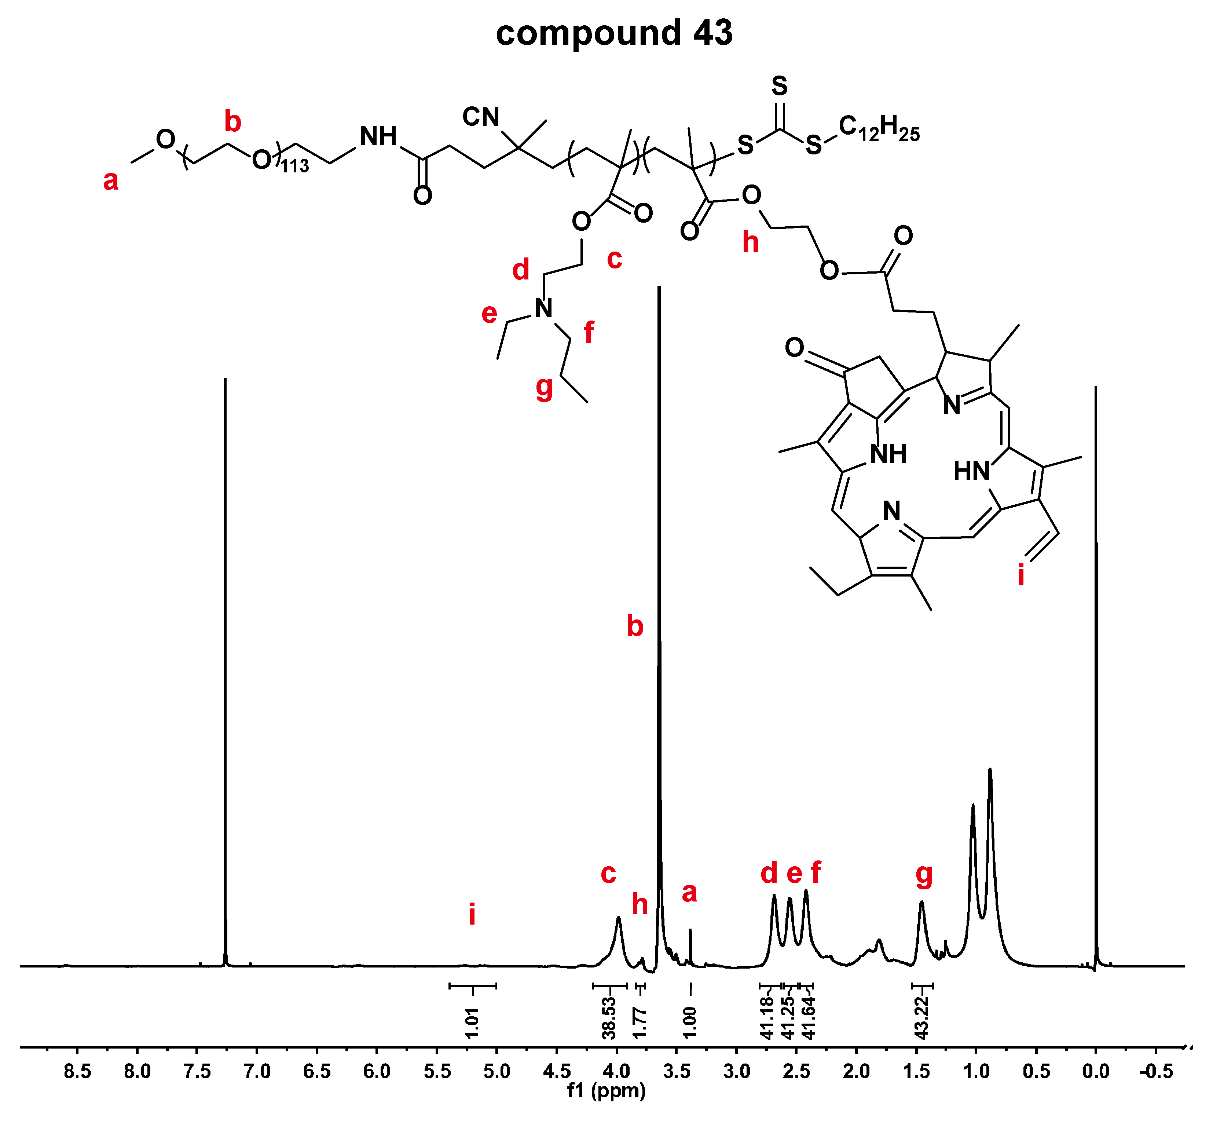


**Supplementary Figure 38.** 1H-NMR spectrum of compound 43 (CDCl3).


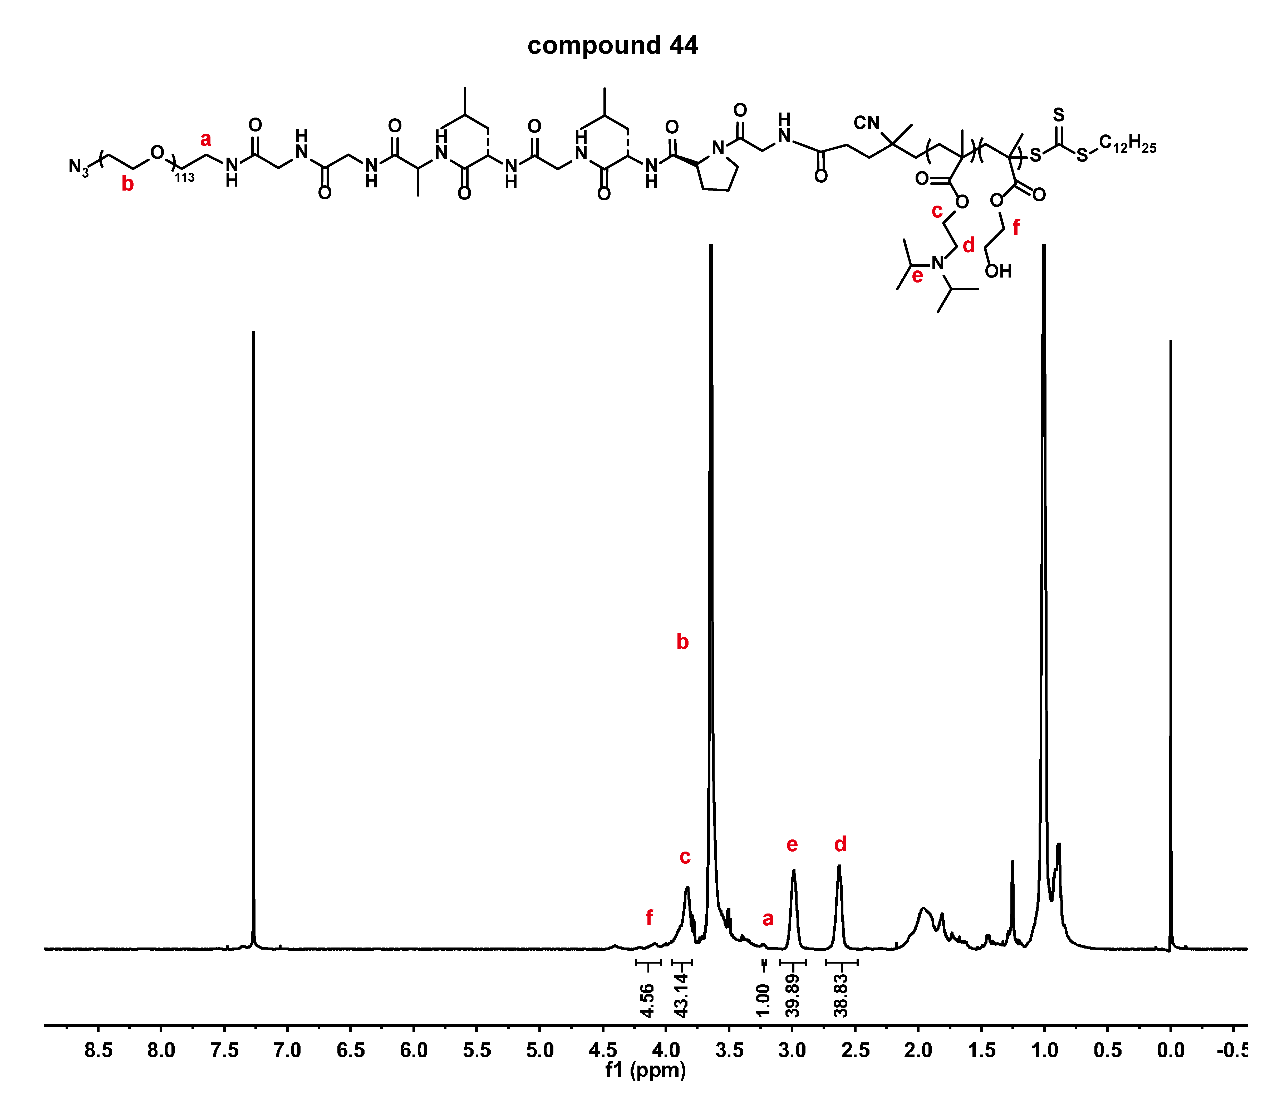


**Supplementary Figure 39.** 1H-NMR spectrum of compound 44 (CDCl3).


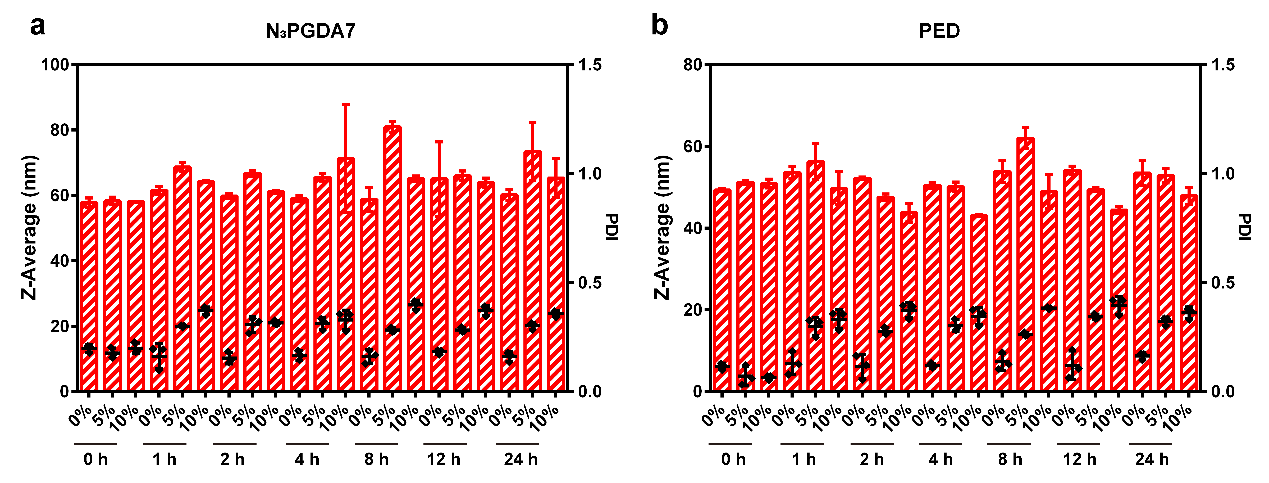


**Supplementary Figure 40. The serum stability of the POLYTAC nanoparticles.** Averaged hydrodynamic diameter and PDI of (**a**) N3@PGDA7, and (**b**) PED nanoparticle as a function fetal calf serum (FBS) concentrations and incubation time.


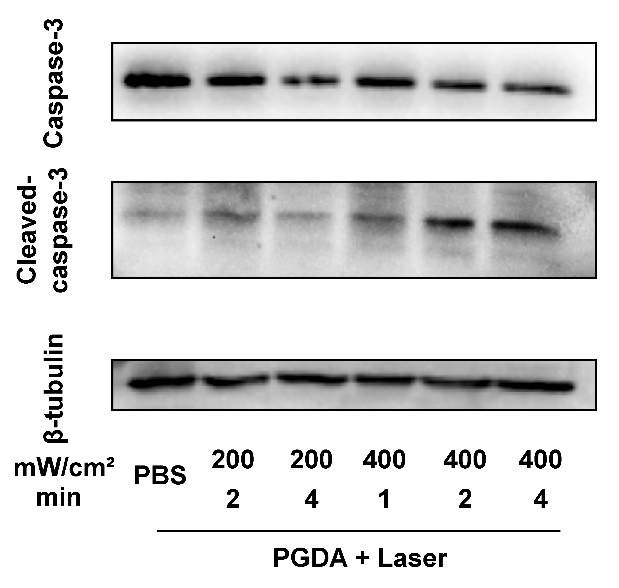


**Supplementary Figure 41.** Western blot assay of caspase-3 activation in the MDA-MB-231 cells upon various treatments. The cells were pretreated with PGDA nanoparticle at an identical PPa concentration of 2.5 uM, then were irradiated by 671 nm laser with different photodensity and irradiation time. After 24 h incubation, the cells were collected and examined by western blot assay.


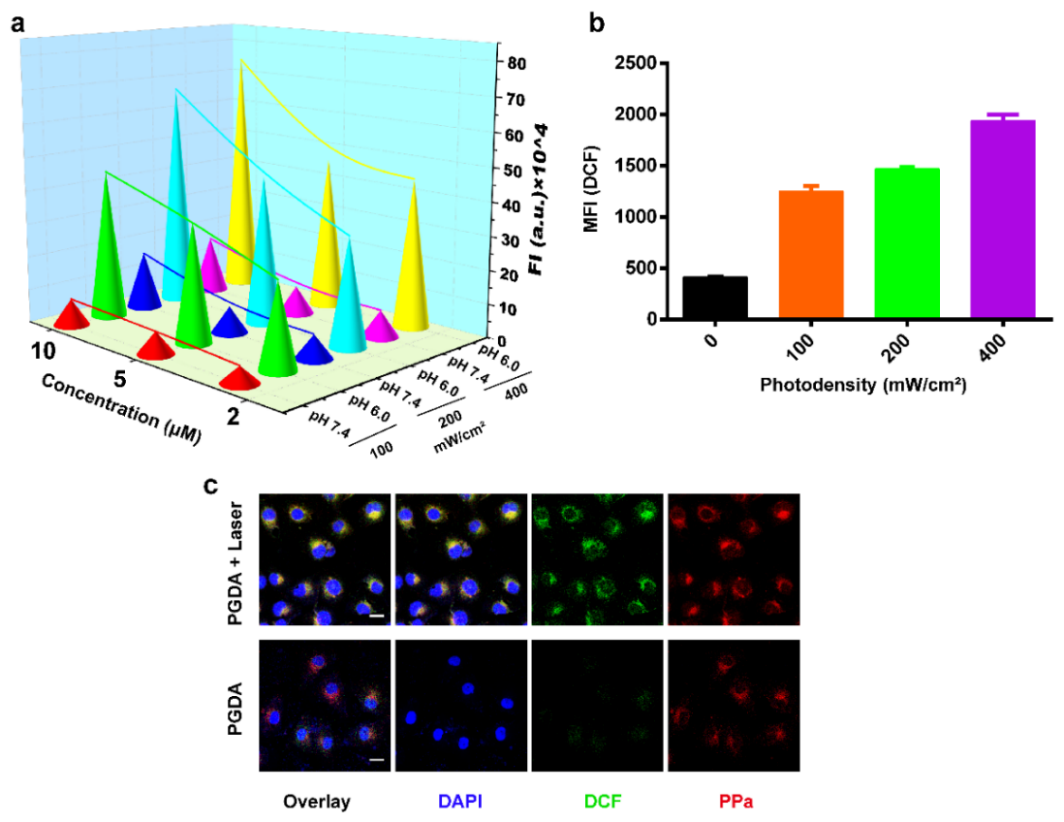


**Supplementary Figure 42.** PDT-inducedROS generation *in vitro*. **a,** Fluorescence intensity of SOSG, a ROS probe, which incubated with PGDA nanoparticle at different PPa concentration in pH 7.4 or pH 6.0 and then irradiated with 671 nm laser at various photodensity; **b,** Flow cytometry examination of intracellular fluorescence signal of DCF. The MDA-MB-231 cells were incubated with PGDA nanoparticles at identical PPa concentration for 12 h, and then irradiated with 671 nm laser at pre-determined photodensity; **c,** CLSM images of MDA-MB-231 cells, which pretreated with PGDA for 12 h, and then irradiated with 671 nm laser (photodensity: 200 mW/cm2, scale bar = 20 μm).


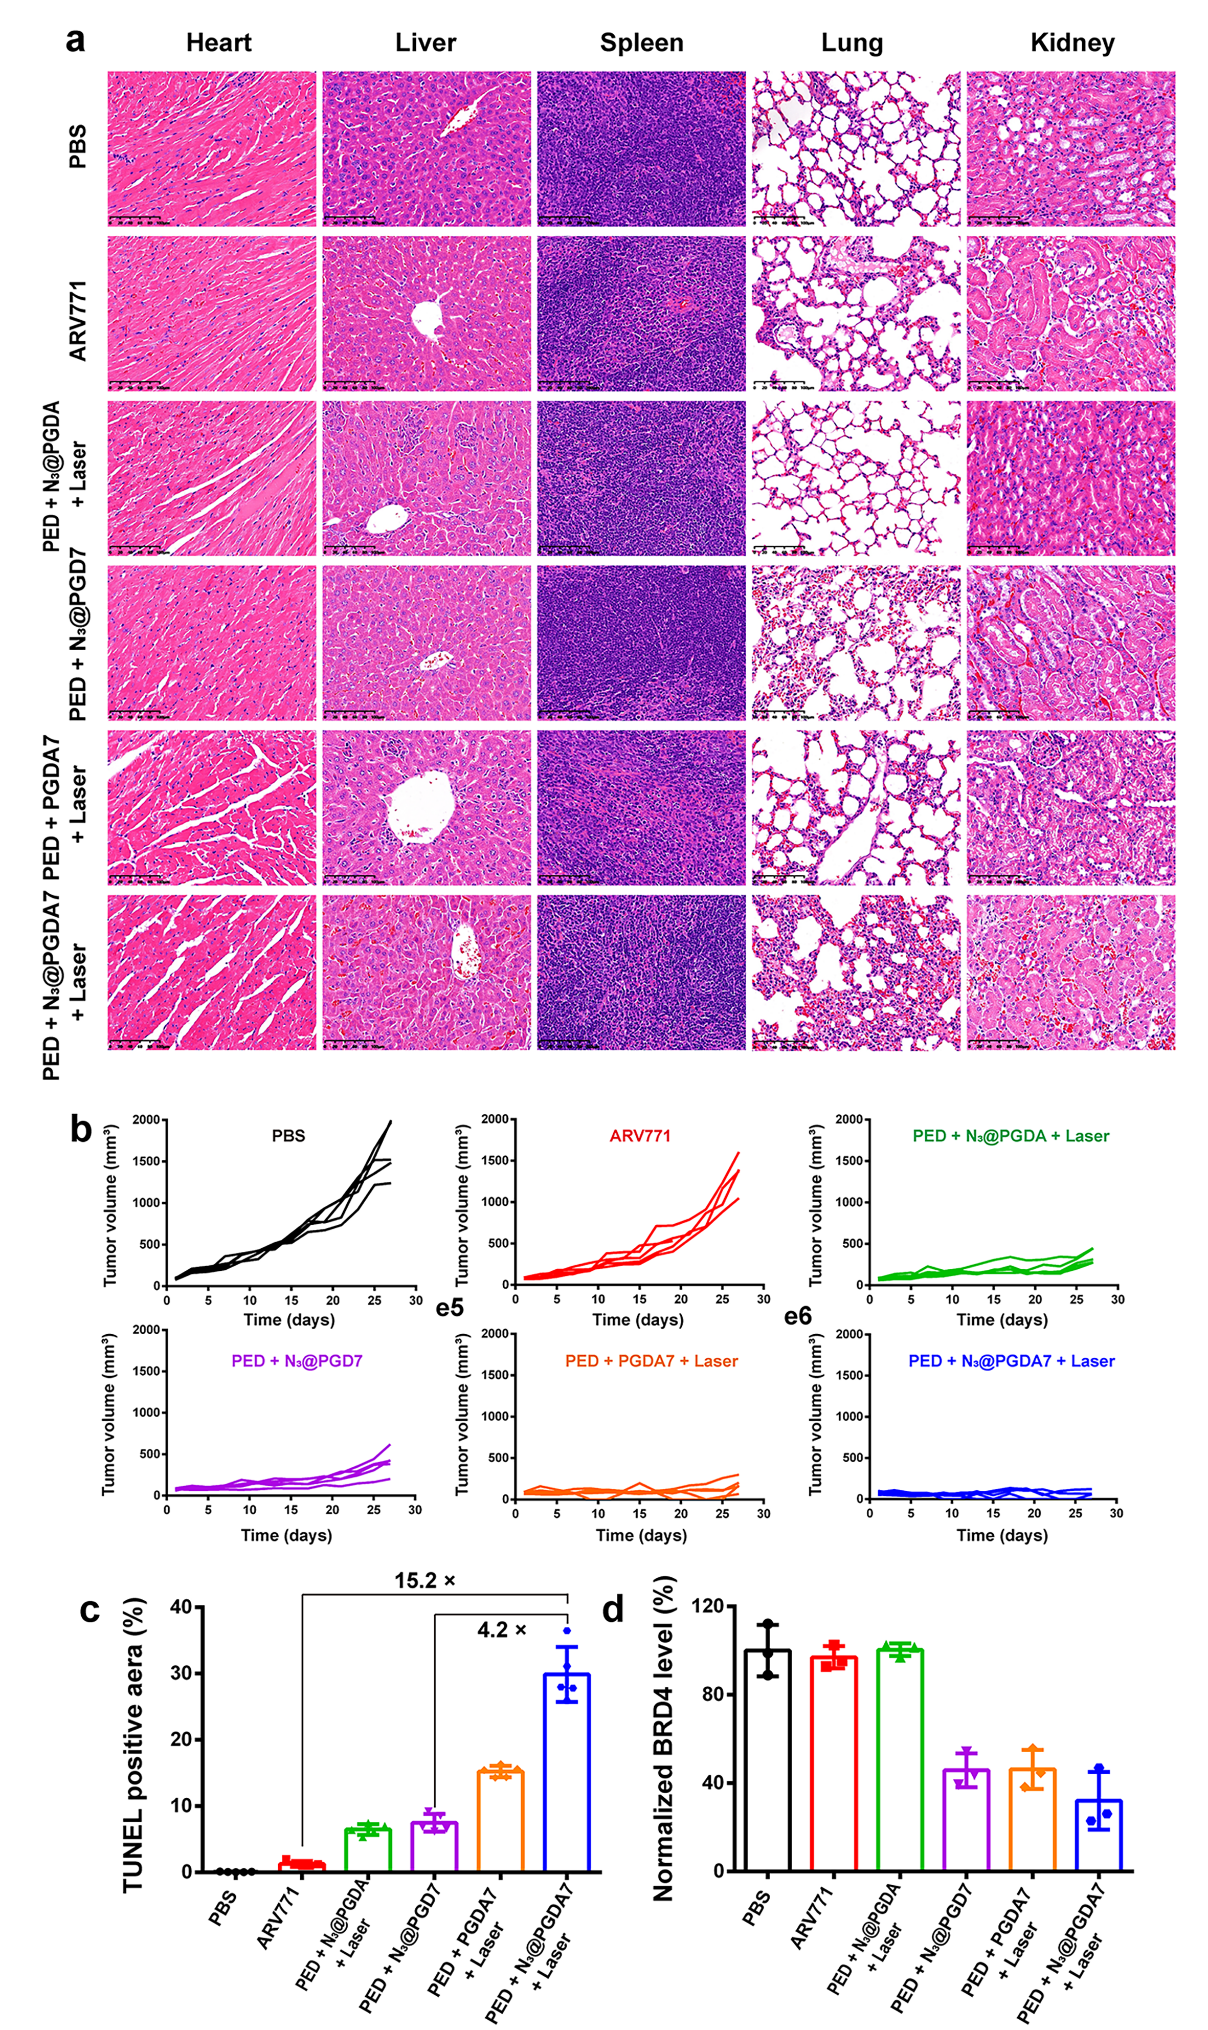


**Supplementary Figure 43. a,** H&E staining of the major organs (heart, liver, spleen, lung, kidney) of MDA-MB-231 tumor-bearing mice (scale bar = 100 μm); **b,** The individual tumor growth curves after treating with various formulations (PBS, ARV771, PED + N3@PGDA + Laser, PED + N3@PGD7, PED + PGD7 + Laser, PED + N3@PGDA7 + Laser ( n = 5, photodensity: 400 mW/cm2, 5 min); **c,** Semi-quantitative analysis of TUNEL staining of the tumor sections; **d,** Semi-quantitation of western-blot-determined BRD4 expression in the tumor tissues post-treatments.
